# Supplementary material for: DEclust: A statistical approach for obtaining differential expression profiles of multiple conditions
Source: PLoS One. 2017 Nov 21;12(11):e0188285. doi: 10.1371/journal.pone.0188285 (PMC5697878; doi:10.1371/journal.pone.0188285)
Supplement: S8 Table — A total of 6,584 genes were detected as DEGs by DESeq2. (XLSX) [file pone.0188285.s021.xlsx]

## Sheet: S8_Table
		Up-regulated
		Normal skin	Papillomas	Carcinomas	Metastasis
Down-regulated	Normal skin		1464	1535	1405
	Papillomas	1668		886	1428
	Carcinomas	1596	798		766
	Metastasis	1358	1139	579
