# Supplementary material for: DEclust: A statistical approach for obtaining differential expression profiles of multiple conditions
Source: PLoS One. 2017 Nov 21;12(11):e0188285. doi: 10.1371/journal.pone.0188285 (PMC5697878; doi:10.1371/journal.pone.0188285)
Supplement: S9 Table — (XLSX) [file pone.0188285.s022.xlsx]

## Sheet: Sheet1
tracking_id	SAMPLE_NORM	SAMPLE_PAPI	SAMPLE_CARC	SAMPLE_META	(NORM, PAPI)	(NORM, CARC)	(NORM, META)	(PAPI, CARC)	(PAPI, META)	(CARC, META)	cluster
ENSMUSG00000000028	148.021	350.27	197.505	46.5151	0	0	0	0	-1	-1	1
ENSMUSG00000019845	53.4391	111.593	79.1912	28.1037	0	0	0	0	-1	-1	1
ENSMUSG00000027811	148.898	296.262	238.014	83.4776	0	0	0	0	-1	-1	1
ENSMUSG00000028693	1233.67	2041.03	1513.52	581.05	0	0	0	0	-1	-1	1
ENSMUSG00000024800	602.303	966.76	835.153	419.513	0	0	0	0	-1	-1	1
ENSMUSG00000061458	939.294	1424.57	1196.48	611.04	0	0	0	0	-1	-1	1
ENSMUSG00000030521	1583.83	2706.86	2267.11	1024.91	0	0	0	0	-1	-1	1
ENSMUSG00000040034	571.111	1057.18	873.884	434.23	0	0	0	0	-1	-1	1
ENSMUSG00000038299	2034.95	2647.93	2229.92	1298.08	0	0	0	0	-1	-1	1
ENSMUSG00000027111	6171.31	7134.34	9670.6	2733.44	0	0	0	0	-1	-1	1
ENSMUSG00000054469	832.907	936.926	1156.7	500.549	0	0	0	0	-1	-1	1
ENSMUSG00000062127	1194.33	1444.93	1506.07	663.476	0	0	0	0	-1	-1	1
ENSMUSG00000035165	91.6107	156.9	179.527	42.623	0	0	0	0	-1	-1	1
ENSMUSG00000054115	141.798	319.583	285.266	94.4224	0	0	0	0	-1	-1	1
ENSMUSG00000027360	221.987	291.705	274.634	49.8131	0	0	0	0	-1	-1	1
ENSMUSG00000022755	5.58394	106.279	108.548	0	0	0	0	0	-1	-1	1
ENSMUSG00000048938	6.49269	92.8741	63.7507	3.45598	0	0	0	0	-1	-1	1
ENSMUSG00000054136	8.98811	91.6011	40.301	1.15199	0	0	0	0	-1	-1	1
ENSMUSG00000027398	344.57	998.431	1070.89	159.55	0	0	0	0	-1	-1	1
ENSMUSG00000074570	21.6433	75.4983	65.2364	2.87999	0	0	0	0	-1	-1	1
ENSMUSG00000075266	91.5683	329.882	257.831	37.1806	0	0	0	0	-1	-1	1
ENSMUSG00000097056	8.3847	38.4441	25.5936	3.31692	0	0	0	0	-1	-1	1
ENSMUSG00000031616	188.524	496.673	949.704	118.655	0	0	0	0	-1	-1	1
ENSMUSG00000048347	8.69003	22.2412	51.9595	1.15199	0	0	0	0	-1	-1	1
ENSMUSG00000000916	190.579	328.975	119.805	97.9746	0	0	0	0	-1	0	1
ENSMUSG00000071537	108.927	174.419	62.9954	59.0282	0	0	0	0	-1	0	1
ENSMUSG00000035834	1761.78	2949.48	926.23	705.896	0	0	0	0	-1	0	1
ENSMUSG00000040181	5082.91	8060.18	2789.33	1869.48	0	0	0	0	-1	0	1
ENSMUSG00000017418	1205.83	1804.91	717.682	486.96	0	0	0	0	-1	0	1
ENSMUSG00000097908	76.6194	110.91	47.6495	28.9578	0	0	0	0	-1	0	1
ENSMUSG00000028331	168.986	283.942	131.649	66.1582	0	0	0	0	-1	0	1
ENSMUSG00000032540	3281.17	5496.15	2302.66	1284.63	0	0	0	0	-1	0	1
ENSMUSG00000028381	2529.34	3899.18	1612.3	733.359	0	0	0	0	-1	0	1
ENSMUSG00000039646	304.661	523.439	199.066	75.8119	0	0	0	0	-1	0	1
ENSMUSG00000043219	52.3493	84.5833	32.9617	12.0161	0	0	0	0	-1	0	1
ENSMUSG00000020706	2467.23	3798.25	1990.85	1097.28	0	0	0	0	-1	0	1
ENSMUSG00000027883	499.239	784.44	410.909	269.419	0	0	0	0	-1	0	1
ENSMUSG00000042729	1117.02	1788.55	801.378	621.399	0	0	0	0	-1	0	1
ENSMUSG00000027804	1516.93	3002.57	1427.05	638.724	0	0	0	0	-1	0	1
ENSMUSG00000039987	806.67	1702.17	722.31	357.818	0	0	0	0	-1	0	1
ENSMUSG00000050410	203.246	436.733	199.091	119.468	0	0	0	0	-1	0	1
ENSMUSG00000029777	1188.94	2329.03	1202.08	662.798	0	0	0	0	-1	0	1
ENSMUSG00000047649	639.12	1175.48	649.191	349.858	0	0	0	0	-1	0	1
ENSMUSG00000043858	1018.68	2033.39	1052.65	661.012	0	0	0	0	-1	0	1
ENSMUSG00000048373	11010.9	21654.9	12756.2	3937.37	0	0	0	0	-1	0	1
ENSMUSG00000050737	5952.66	11950.7	6472.54	2450.9	0	0	0	0	-1	0	1
ENSMUSG00000030559	2237.32	3723.12	1914.28	600.602	0	0	0	0	-1	0	1
ENSMUSG00000035105	2157.6	3367.13	1747.98	598.187	0	0	0	0	-1	0	1
ENSMUSG00000033788	84.7837	125.805	78.2992	17.5975	0	0	0	0	-1	0	1
ENSMUSG00000004099	1353.81	1759.04	1098.04	687.862	0	0	0	0	-1	0	1
ENSMUSG00000010097	1546.67	2238.66	1229.03	899.477	0	0	0	0	-1	0	1
ENSMUSG00000026577	3404.55	4782.04	2600.83	1950.84	0	0	0	0	-1	0	1
ENSMUSG00000030347	454.393	609.771	356.053	267.613	0	0	0	0	-1	0	1
ENSMUSG00000016257	2959.55	4050.69	2115.87	1463.62	0	0	0	0	-1	0	1
ENSMUSG00000006998	10069.6	12858.3	6813.58	5423.6	0	0	0	0	-1	0	1
ENSMUSG00000037814	340.547	448.918	224.951	195.912	0	0	0	0	-1	0	1
ENSMUSG00000024120	519.863	644.388	319.98	294.78	0	0	0	0	-1	0	1
ENSMUSG00000013701	2091.68	2874.9	1848.61	1420.74	0	0	0	0	-1	0	1
ENSMUSG00000032601	991.436	1312.87	832.801	624.398	0	0	0	0	-1	0	1
ENSMUSG00000038374	1938.58	2774.03	1791.72	1425.07	0	0	0	0	-1	0	1
ENSMUSG00000063800	1503.93	1934.26	1187.05	1022.42	0	0	0	0	-1	0	1
ENSMUSG00000027774	1202.73	1481.75	979.161	729.127	0	0	0	0	-1	0	1
ENSMUSG00000059796	7687.06	9687.68	6743.38	4933.36	0	0	0	0	-1	0	1
ENSMUSG00000061062	390.791	518.378	356.375	264.432	0	0	0	0	-1	0	1
ENSMUSG00000056214	1694.7	1951.84	1348.53	961.011	0	0	0	0	-1	0	1
ENSMUSG00000022241	2772.38	3540.97	2607.17	1956.65	0	0	0	0	-1	0	1
ENSMUSG00000033285	1283.62	1781.1	1249.57	881.546	0	0	0	0	-1	0	1
ENSMUSG00000038518	1663.05	2192.13	1605.84	1000.58	0	0	0	0	-1	0	1
ENSMUSG00000030774	1563.61	1843.08	1508.06	921.116	0	0	0	0	-1	0	1
ENSMUSG00000032555	602.564	816.443	658.91	343.284	0	0	0	0	-1	0	1
ENSMUSG00000059119	2655.87	3779.66	3062.64	1846.85	0	0	0	0	-1	0	1
ENSMUSG00000007050	272.567	429.715	257.411	178.91	0	0	0	0	-1	0	1
ENSMUSG00000039130	597.704	980.636	569.49	378.698	0	0	0	0	-1	0	1
ENSMUSG00000027752	987.513	1621.02	1063.03	592.983	0	0	0	0	-1	0	1
ENSMUSG00000048078	780.051	1215.13	840.491	434.113	0	0	0	0	-1	0	1
ENSMUSG00000047766	204.314	328.665	237.151	113.229	0	0	0	0	-1	0	1
ENSMUSG00000085666	606.211	1008.92	737.443	369.484	0	0	0	0	-1	0	1
ENSMUSG00000024833	110.734	182.393	124.146	78.4911	0	0	0	0	-1	0	1
ENSMUSG00000030138	1162.22	1937.46	1385.68	903.06	0	0	0	0	-1	0	1
ENSMUSG00000049516	1471.29	2317.92	1640.12	1071.79	0	0	0	0	-1	0	1
ENSMUSG00000033991	952.323	1452.27	1082.06	606.331	0	0	0	0	-1	0	1
ENSMUSG00000033356	243.668	364.675	231.154	115.574	0	0	0	0	-1	0	1
ENSMUSG00000033792	1514.91	2556.14	1499.82	739.213	0	0	0	0	-1	0	1
ENSMUSG00000014859	255.109	489.667	308.334	245.426	0	0	0	0	-1	0	1
ENSMUSG00000028899	769.929	1372.49	891.596	743.91	0	0	0	0	-1	0	1
ENSMUSG00000024493	2456.09	3890.12	2526.63	1971.42	0	0	0	0	-1	0	1
ENSMUSG00000028902	1339.08	1988.04	1364.35	1050.05	0	0	0	0	-1	0	1
ENSMUSG00000026491	770.213	1193.83	863.146	629.093	0	0	0	0	-1	0	1
ENSMUSG00000030983	2538.29	3729.37	2739.5	1858.45	0	0	0	0	-1	0	1
ENSMUSG00000034321	815.921	1157.34	880.591	613.95	0	0	0	0	-1	0	1
ENSMUSG00000031634	970.8	1418.17	1046.87	856.163	0	0	0	0	-1	0	1
ENSMUSG00000044573	3023.83	4450.8	3294.95	2586.43	0	0	0	0	-1	0	1
ENSMUSG00000020917	7782.29	13247	7758.19	6189.6	0	0	0	0	-1	0	1
ENSMUSG00000027998	1256.21	2079.57	1167.33	916.011	0	0	0	0	-1	0	1
ENSMUSG00000034681	368.354	588.682	330.821	273.054	0	0	0	0	-1	0	1
ENSMUSG00000042814	311.93	567.303	312.306	275.397	0	0	0	0	-1	0	1
ENSMUSG00000028800	2052.75	3863.06	2288.78	1710.14	0	0	0	0	-1	0	1
ENSMUSG00000035585	409.957	753.696	444.932	331.601	0	0	0	0	-1	0	1
ENSMUSG00000066150	2367.59	4347.63	2657.46	1846.1	0	0	0	0	-1	0	1
ENSMUSG00000041632	520.216	1094.48	633.05	470.894	0	0	0	0	-1	0	1
ENSMUSG00000021079	315.363	504.439	393.675	267.016	0	0	0	0	-1	0	1
ENSMUSG00000037376	781.535	1290.01	1103.64	662.736	0	0	0	0	-1	0	1
ENSMUSG00000047379	738.595	1321.17	1076.14	635.503	0	0	0	0	-1	0	1
ENSMUSG00000026914	4298.77	8017.21	5711.93	3837.7	0	0	0	0	-1	0	1
ENSMUSG00000074925	160.782	288.857	217.16	136.905	0	0	0	0	-1	0	1
ENSMUSG00000020075	2325.06	4320.17	3603.66	1848.98	0	0	0	0	-1	0	1
ENSMUSG00000047832	1560.65	2738.25	2103.91	1018.26	0	0	0	0	-1	0	1
ENSMUSG00000022673	1511.23	3159.69	2131.05	1042.53	0	0	0	0	-1	0	1
ENSMUSG00000046434	3984.6	8470.27	5996.04	2665.14	0	0	0	0	-1	0	1
ENSMUSG00000025816	110.183	207.866	143.076	64.6088	0	0	0	0	-1	0	1
ENSMUSG00000031286	988.415	1735.96	1259.16	530.225	0	0	0	0	-1	0	1
ENSMUSG00000052798	836.869	1477.36	1108.38	474.828	0	0	0	0	-1	0	1
ENSMUSG00000025364	9521.17	18826.8	11865.2	5869.37	0	0	0	0	-1	0	1
ENSMUSG00000040250	826.511	1683.05	1064.86	594.991	0	0	0	0	-1	0	1
ENSMUSG00000032939	899.102	1655.48	1034.68	587.083	0	0	0	0	-1	0	1
ENSMUSG00000056209	57.1062	122.253	70.4122	40.0993	0	0	0	0	-1	0	1
ENSMUSG00000032279	4403.97	8921.08	6377.52	3413.68	0	0	0	0	-1	0	1
ENSMUSG00000047554	1178.97	2662.39	1766.32	972.896	0	0	0	0	-1	0	1
ENSMUSG00000042541	4392.54	9098.44	6191.72	3918.78	0	0	0	0	-1	0	1
ENSMUSG00000028645	4778.3	11812.5	8171.19	2940.26	0	0	0	0	-1	0	1
ENSMUSG00000005299	484.321	878.192	393.461	345.507	0	0	0	0	-1	0	1
ENSMUSG00000025228	5591.75	9258.32	4247.82	4035.09	0	0	0	0	-1	0	1
ENSMUSG00000007589	170.257	341.724	140.32	124.829	0	0	0	0	-1	0	1
ENSMUSG00000020549	361.124	794.946	344.417	314.861	0	0	0	0	-1	0	1
ENSMUSG00000024208	1615.79	3285.19	1586.94	1401.49	0	0	0	0	-1	0	1
ENSMUSG00000039356	617.935	1380.88	666.15	596.672	0	0	0	0	-1	0	1
ENSMUSG00000066043	1514.87	3057.08	1481.7	1457.56	0	0	0	0	-1	0	1
ENSMUSG00000015176	1376.55	3157.44	1517.06	1133.1	0	0	0	0	-1	0	1
ENSMUSG00000068394	127.936	175.671	138.33	52.2355	0	0	0	0	-1	0	1
ENSMUSG00000021595	1406.79	1751.07	1533.68	1112.98	0	0	0	0	-1	0	1
ENSMUSG00000028063	10150.2	11408.6	5383.18	4015.07	0	0	0	0	-1	0	1
ENSMUSG00000049327	2223.04	2481.23	1335.46	975.021	0	0	0	0	-1	0	1
ENSMUSG00000062867	3976.72	4638.87	2210.82	1956.42	0	0	0	0	-1	0	1
ENSMUSG00000028953	3054.96	3822.84	1759.33	1319.69	0	0	0	0	-1	0	1
ENSMUSG00000040010	440.703	471.349	234.053	108.385	0	0	0	0	-1	0	1
ENSMUSG00000049507	24.9481	29.4291	18.8638	5.91878	0	0	0	0	-1	0	1
ENSMUSG00000057751	173.91	201.543	57.5162	62.1048	0	0	0	0	-1	0	1
ENSMUSG00000002332	2087.56	5463.2	1506.5	1518.91	0	0	0	0	-1	0	1
ENSMUSG00000026202	10059.7	29974.5	8040.01	6905.84	0	0	0	0	-1	0	1
ENSMUSG00000044502	157.726	502.896	171.012	138.155	0	0	0	0	-1	0	1
ENSMUSG00000023988	503.347	1078.78	351.742	302.728	0	0	0	0	-1	0	1
ENSMUSG00000021553	739.266	1841.24	650.927	259.813	0	0	0	0	-1	0	1
ENSMUSG00000021868	565.52	1333.14	430.828	164.791	0	0	0	0	-1	0	1
ENSMUSG00000024891	213.947	458.871	128.498	46.4163	0	0	0	0	-1	0	1
ENSMUSG00000036564	209.007	421.257	133.128	65.0045	0	0	0	0	-1	0	1
ENSMUSG00000079018	3664.46	7662.3	3116.34	768.69	0	0	0	0	-1	0	1
ENSMUSG00000024526	822.433	2171.94	461.462	118.675	0	0	0	0	-1	0	1
ENSMUSG00000025889	101.379	355.829	76.8621	35.2732	0	0	0	0	-1	0	1
ENSMUSG00000028978	15.1755	55.125	12.691	5.77972	0	0	0	0	-1	0	1
ENSMUSG00000029188	302.917	1191.62	268.87	52.2767	0	0	0	0	-1	0	1
ENSMUSG00000085337	27.22	102.22	18.5512	4.60798	0	0	0	0	-1	0	1
ENSMUSG00000037904	31.3415	128.526	19.8083	10.6856	0	0	0	0	-1	0	1
ENSMUSG00000026278	555.716	1741.96	651.421	193.99	0	0	0	0	-1	0	1
ENSMUSG00000028896	438.539	1227	452.366	198.437	0	0	0	0	-1	0	1
ENSMUSG00000028524	5367.81	19496.8	7912.06	2810.79	0	0	0	0	-1	0	1
ENSMUSG00000028587	69.0586	275.959	116.179	47.0919	0	0	0	0	-1	0	1
ENSMUSG00000053716	881.4	2786.93	1194.98	551.818	0	0	0	0	-1	0	1
ENSMUSG00000097815	37550.3	129699	54144.8	24132.1	0	0	0	0	-1	0	1
ENSMUSG00000049932	86.8858	255.976	130.238	70.4477	0	0	0	0	-1	0	1
ENSMUSG00000012443	149.392	1051.3	648.133	121.873	0	0	0	0	-1	0	1
ENSMUSG00000038943	555.742	3568.91	2007.76	456.665	0	0	0	0	-1	0	1
ENSMUSG00000027699	308.116	1428.63	868.18	179.173	0	0	0	0	-1	0	1
ENSMUSG00000032400	69.1477	330.829	196.117	42.8213	0	0	0	0	-1	0	1
ENSMUSG00000024379	95.7746	895.074	504.31	61.5519	0	0	0	0	-1	0	1
ENSMUSG00000025650	91.2381	305.857	204.032	22.7618	0	0	0	0	-1	0	1
ENSMUSG00000044005	7.52563	27.0448	17.4044	2.16493	0	0	0	0	-1	0	1
ENSMUSG00000033031	252.671	957.974	629.592	159.41	0	0	0	0	-1	0	1
ENSMUSG00000097028	2.72624	11.5986	6.42368	0	0	0	0	0	-1	0	1
ENSMUSG00000049511	0.429534	9.971	6.50512	0	0	0	0	0	-1	0	1
ENSMUSG00000021391	81.3909	192.851	103.658	24.8469	0	0	0	0	-1	0	1
ENSMUSG00000033644	71.9018	194.651	117.913	18.1538	0	0	0	0	-1	0	1
ENSMUSG00000058427	767.476	1709.76	1180.93	131.723	0	0	0	0	-1	0	1
ENSMUSG00000050944	14.2491	31.8368	15.183	0	0	0	0	0	-1	0	1
ENSMUSG00000089453	4.84907	9.11172	3.28672	0	0	0	0	0	-1	0	1
ENSMUSG00000036777	897.643	2046.83	1716.72	247.38	0	0	0	0	-1	0	1
ENSMUSG00000024378	2233.47	2988.89	672.711	366.532	0	0	0	0	-1	0	1
ENSMUSG00000046070	36.3892	46.3153	10.2608	2.30399	0	0	0	0	-1	0	1
ENSMUSG00000093598	30.3758	45.0689	7.95143	3.89292	0	0	0	0	-1	0	1
ENSMUSG00000026930	186.211	358.941	66.0378	47.6086	0	0	0	0	-1	0	1
ENSMUSG00000032715	243.617	462.408	109.951	59.2479	0	0	0	0	-1	0	1
ENSMUSG00000054065	5582.98	11678.6	2817.76	2002.08	0	0	0	0	-1	0	1
ENSMUSG00000046490	1287.91	2353.76	425.567	173.117	0	0	0	0	-1	0	1
ENSMUSG00000036731	8997.85	21670.1	2955.32	2716.74	0	0	0	0	-1	0	1
ENSMUSG00000024114	3.00674	30.2943	29.0235	1.58893	0	0	0	0	-1	0	1
ENSMUSG00000016346	2.27187	49.4971	6.09133	0	0	0	0	0	-1	0	1
ENSMUSG00000026984	204.184	6785.37	772.293	132.777	0	0	0	0	-1	0	1
ENSMUSG00000054958	0.908747	16.4932	2.4854	0	0	0	0	0	-1	0	1
ENSMUSG00000066108	2.27187	23.4934	2.88606	0	0	0	0	0	-1	0	1
ENSMUSG00000023047	11.5902	77.4922	15.828	0.436935	0	0	0	0	-1	0	1
ENSMUSG00000050445	8.12905	46.4062	8.99052	1.15199	0	0	0	0	-1	0	1
ENSMUSG00000026985	676.38	3310.99	728.944	85.6845	0	0	0	0	-1	0	1
ENSMUSG00000026669	46.8295	408.77	118.799	32.5537	0	0	0	0	-1	0	1
ENSMUSG00000034773	21.693	206.614	70.8522	22.9008	0	0	0	0	-1	0	1
ENSMUSG00000022935	9.51701	34.4322	2.88606	0.436935	0	0	0	0	-1	0	1
ENSMUSG00000025020	4.77455	22.8218	2.89262	0	0	0	0	0	-1	0	1
ENSMUSG00000029410	3.58531	18.0182	6.58657	0	0	0	0	0	-1	0	1
ENSMUSG00000044021	3.43627	23.294	8.50841	0	0	0	0	0	-1	0	1
ENSMUSG00000000308	5659.04	12224.3	2555.83	3259.9	0	0	0	-1	-1	0	1
ENSMUSG00000038046	290.021	620.26	150.955	194.74	0	0	0	-1	-1	0	1
ENSMUSG00000021273	5348.26	12407.4	2537.86	4107.13	0	0	0	-1	-1	0	1
ENSMUSG00000042549	66.3676	161.169	34.4277	53.1884	0	0	0	-1	-1	0	1
ENSMUSG00000008035	1103.69	2043.68	608.63	663.051	0	0	0	-1	-1	0	1
ENSMUSG00000018932	3413.63	7070.95	2130.4	2350.15	0	0	0	-1	-1	0	1
ENSMUSG00000020513	177.055	314.154	99.9151	122.624	0	0	0	-1	-1	0	1
ENSMUSG00000032612	5189.16	9043.96	3263.66	3767.98	0	0	0	-1	-1	0	1
ENSMUSG00000002658	865.198	1810.08	722.092	754.196	0	0	0	-1	-1	0	1
ENSMUSG00000028811	1352.03	2641.09	1045.96	1102.48	0	0	0	-1	-1	0	1
ENSMUSG00000032264	615.75	1209.24	473.447	524.494	0	0	0	-1	-1	0	1
ENSMUSG00000030533	1340.36	2932.82	1091.59	984.07	0	0	0	-1	-1	0	1
ENSMUSG00000051627	190.635	466.564	153.393	152.537	0	0	0	-1	-1	0	1
ENSMUSG00000002129	1433.04	2614.6	1203.86	1293.02	0	0	0	-1	-1	0	1
ENSMUSG00000031171	427.899	731.132	371.676	346.144	0	0	0	-1	-1	0	1
ENSMUSG00000020532	1173.89	1959.55	874.071	868.051	0	0	0	-1	-1	0	1
ENSMUSG00000049091	166.633	266.965	121.756	136.843	0	0	0	-1	-1	0	1
ENSMUSG00000030316	477.154	871.471	461.349	465.87	0	0	0	-1	-1	0	1
ENSMUSG00000006392	1492.95	2098.93	1176.28	1090.56	0	0	0	-1	-1	0	1
ENSMUSG00000020495	270.756	415.395	213.723	200.024	0	0	0	-1	-1	0	1
ENSMUSG00000033769	1625.82	2388.16	1310.02	1063.81	0	0	0	-1	-1	0	1
ENSMUSG00000020739	735.218	1083.6	488.783	431.747	0	0	0	-1	-1	0	1
ENSMUSG00000032508	1359.52	1998.99	888.071	794.161	0	0	0	-1	-1	0	1
ENSMUSG00000030741	769.922	1087.9	445.423	417.703	0	0	0	-1	-1	0	1
ENSMUSG00000021458	919.53	1496.45	736.71	553.48	0	0	0	-1	-1	0	1
ENSMUSG00000030341	4226.4	6760.66	3145.62	2311.66	0	0	0	-1	-1	0	1
ENSMUSG00000033075	1177.23	1821	1125.9	1105.62	0	0	0	-1	-1	0	1
ENSMUSG00000032897	1050.29	1229.23	622.523	637.21	0	0	0	-1	-1	0	1
ENSMUSG00000042719	2627.72	3251.22	1335.32	1457.74	0	0	0	-1	-1	0	1
ENSMUSG00000001552	20379.6	29616.6	7189.13	7519.78	0	0	0	-1	-1	0	1
ENSMUSG00000051375	1862.73	3294.56	654.94	760.844	0	0	0	-1	-1	0	1
ENSMUSG00000022938	302.477	434.126	75.8335	59.8041	0	0	0	-1	-1	0	1
ENSMUSG00000004931	183.825	275.61	90.5594	102.444	0	0	0	-1	-1	0	1
ENSMUSG00000024037	331.774	450.557	157.955	183.797	0	0	0	-1	-1	0	1
ENSMUSG00000063904	2613.65	3508.65	1085.01	1264.96	0	0	0	-1	-1	0	1
ENSMUSG00000018347	521.469	699.381	263.519	242.569	0	0	0	-1	-1	0	1
ENSMUSG00000066441	1104.65	1698.41	545.639	502.627	0	0	0	-1	-1	0	1
ENSMUSG00000005994	12.4565	115.555	2.00329	0	0	0	0	-1	-1	0	1
ENSMUSG00000032978	1.31344	10.6426	0	0	0	0	0	-1	-1	0	1
ENSMUSG00000086254	1.33828	10.9271	0	0	0	0	0	-1	-1	0	1
ENSMUSG00000024502	6.87254	45.6379	0	0	0	0	0	-1	-1	0	1
ENSMUSG00000085742	4.03968	23.5668	0	0	0	0	0	-1	-1	0	1
ENSMUSG00000090840	0.429534	8.34337	0	0	0	0	0	-1	-1	0	1
ENSMUSG00000032807	6789.15	35620.1	2381.58	859.984	0	0	0	-1	-1	0	1
ENSMUSG00000064177	6.26187	35.2798	2.81118	1.01293	0	0	0	-1	-1	0	1
ENSMUSG00000078504	7.12094	28.1652	0	0	0	0	0	-1	-1	0	1
ENSMUSG00000086854	3.05642	13.7101	0	0.575997	0	0	0	-1	-1	0	1
ENSMUSG00000021203	240.678	742.842	94.8825	143.059	0	0	0	-1	-1	0	1
ENSMUSG00000069917	112.671	353.747	54.3858	60.1991	0	0	0	-1	-1	0	1
ENSMUSG00000022947	467.784	1209.97	235.485	248.944	0	0	0	-1	-1	0	1
ENSMUSG00000052305	8194.51	19732.4	2981.84	3234.24	0	0	0	-1	-1	0	1
ENSMUSG00000070604	652.25	1662.94	198.473	203.525	0	0	0	-1	-1	0	1
ENSMUSG00000071113	9.6733	24.2618	2.08474	2.18467	0	0	0	-1	-1	0	1
ENSMUSG00000030930	722.538	1605.92	477.169	313.596	0	0	0	-1	-1	0	1
ENSMUSG00000035049	795.964	1718.92	418.285	313.29	0	0	0	-1	-1	0	1
ENSMUSG00000032537	55.8673	162.518	54.3989	22.7017	0	0	0	-1	-1	0	1
ENSMUSG00000029321	974.854	3230.17	467.151	194.858	0	0	0	-1	-1	0	1
ENSMUSG00000037577	3052.65	11111.2	1104.45	735.924	0	0	0	-1	-1	0	1
ENSMUSG00000055809	15.1755	43.7374	3.85026	4.05173	0	0	0	-1	-1	0	1
ENSMUSG00000066583	7.2203	17.244	0	0	0	0	0	-1	-1	0	1
ENSMUSG00000024387	5933.09	7487.3	2655.91	3418.52	0	-1	0	-1	-1	0	1
ENSMUSG00000066838	1213.61	1416.28	404.686	534.754	0	-1	0	-1	-1	0	1
ENSMUSG00000030126	606.573	945.432	213.719	328.787	0	-1	0	-1	-1	0	1
ENSMUSG00000030556	5262.03	7181.29	1302.7	2520.88	0	-1	0	-1	-1	0	1
ENSMUSG00000027456	2637.86	5607.72	785.324	1320.38	0	-1	0	-1	-1	0	1
ENSMUSG00000061126	1995.33	4152.28	572.363	791.581	0	-1	0	-1	-1	0	1
ENSMUSG00000041939	911.075	2104.56	334.776	619.457	0	-1	0	-1	-1	0	1
ENSMUSG00000047797	17.6781	210.394	0.400659	8.30176	0	-1	0	-1	-1	0	1
ENSMUSG00000000031	106.125	94.1672	55.8032	0.575997	0	0	-1	0	-1	-1	1
ENSMUSG00000097736	53.1556	53.8786	28.7436	0.436935	0	0	-1	0	-1	-1	1
ENSMUSG00000030050	19.2472	16.5841	8.02631	0	0	0	-1	0	-1	-1	1
ENSMUSG00000025082	84.0457	70.0873	18.9124	0	0	0	-1	0	-1	-1	1
ENSMUSG00000022144	58.874	37.1919	39.3854	1.72799	0	0	-1	0	-1	-1	1
ENSMUSG00000029314	1259.39	706.797	750.421	209.004	0	0	-1	0	-1	-1	1
ENSMUSG00000051314	96.4162	40.8342	71.3383	5.75997	0	0	-1	0	-1	-1	1
ENSMUSG00000035493	16450.1	6447.82	8092.81	2046.15	0	0	-1	0	-1	-1	1
ENSMUSG00000021118	2142.53	3280.71	2190.21	982.738	0	0	-1	0	-1	-1	1
ENSMUSG00000023953	292.633	347.545	244.437	104.014	0	0	-1	0	-1	-1	1
ENSMUSG00000040177	719.476	790.48	581.055	226.38	0	0	-1	0	-1	-1	1
ENSMUSG00000040760	1778.49	1835.36	1636.61	930.545	0	0	-1	0	-1	-1	1
ENSMUSG00000021196	8183.14	7491.08	6674.29	2057.36	0	0	-1	0	-1	-1	1
ENSMUSG00000029802	1187.67	975.466	1224.71	209.343	0	0	-1	0	-1	-1	1
ENSMUSG00000031749	372.036	359.053	427.47	106.458	0	0	-1	0	-1	-1	1
ENSMUSG00000025757	1852.25	2586.72	2833.63	777.915	0	0	-1	0	-1	-1	1
ENSMUSG00000035245	888.395	980.109	1242.25	474.787	0	0	-1	0	-1	-1	1
ENSMUSG00000042029	419.219	789.187	645.042	116.548	0	0	-1	0	-1	-1	1
ENSMUSG00000055407	194.062	499.172	306.575	24.9259	0	0	-1	0	-1	-1	1
ENSMUSG00000058290	79.1966	205.828	116.74	13.7046	0	0	-1	0	-1	-1	1
ENSMUSG00000073988	67.0673	101.672	60.7569	2.76067	0	0	-1	0	-1	-1	1
ENSMUSG00000007080	163.637	484.23	192.957	51.1041	0	0	-1	0	-1	-1	1
ENSMUSG00000096965	200.168	841.617	348.408	14.4197	0	0	-1	0	-1	-1	1
ENSMUSG00000030713	35986.3	61813.9	12615.9	299.24	0	0	-1	0	-1	-1	1
ENSMUSG00000040127	8262	12727.8	1683.26	96.0525	0	0	-1	0	-1	-1	1
ENSMUSG00000033765	77045.4	190532	17830.3	563.663	0	0	-1	0	-1	-1	1
ENSMUSG00000070465	294.304	1088.99	114.45	2.18467	0	0	-1	0	-1	-1	1
ENSMUSG00000025221	97.1905	17.5402	29.3361	0.436935	0	0	-1	0	-1	-1	1
ENSMUSG00000026166	243.949	76.3017	59.6364	0	0	0	-1	0	-1	-1	1
ENSMUSG00000031737	309.643	86.0174	102.733	1.72799	0	0	-1	0	-1	-1	1
ENSMUSG00000031757	297.041	18.6898	36.1407	0	0	0	-1	0	-1	-1	1
ENSMUSG00000071847	590.852	60.0254	123.516	8.71895	-1	0	-1	0	-1	-1	1
ENSMUSG00000017204	5350.67	16935.8	1073.44	189.99	0	0	-1	-1	-1	-1	1
ENSMUSG00000027919	2249.4	6798.07	219.285	1.72799	0	0	-1	-1	-1	-1	1
ENSMUSG00000091340	885.655	2581.86	286.755	4.60798	0	0	-1	-1	-1	-1	1
ENSMUSG00000042244	575.569	1299.58	188.382	5.18398	0	0	-1	-1	-1	-1	1
ENSMUSG00000024409	970.555	5671.36	644.256	27.6479	0	0	-1	-1	-1	-1	1
ENSMUSG00000081977	2769.23	13906.2	1300.17	13.8239	0	0	-1	-1	-1	-1	1
ENSMUSG00000038751	2001.2	2279.59	354.035	43.9346	0	0	-1	-1	-1	-1	1
ENSMUSG00000045566	324.747	301.916	99.5801	0.575997	0	0	-1	-1	-1	-1	1
ENSMUSG00000000552	241.207	230.016	109.055	77.8172	0	0	-1	0	-1	0	1
ENSMUSG00000014547	240.277	217.28	101.43	70.2297	0	0	-1	0	-1	0	1
ENSMUSG00000029178	2990.82	2935.64	1284.99	1133.16	0	0	-1	0	-1	0	1
ENSMUSG00000007379	2581.2	2617.13	1485.81	754.478	0	0	-1	0	-1	0	1
ENSMUSG00000032344	153.601	157.213	85.0513	49.5744	0	0	-1	0	-1	0	1
ENSMUSG00000024528	577.823	631.754	403.897	240.081	0	0	-1	0	-1	0	1
ENSMUSG00000025139	6941.76	6894.04	4722.36	2653.39	0	0	-1	0	-1	0	1
ENSMUSG00000053617	798.945	833.901	546.912	252.402	0	0	-1	0	-1	0	1
ENSMUSG00000020654	94.2873	114.496	73.3311	25.4821	0	0	-1	0	-1	0	1
ENSMUSG00000052516	542.669	605.293	354.046	139.013	0	0	-1	0	-1	0	1
ENSMUSG00000015748	806.45	912.549	633.074	425.947	0	0	-1	0	-1	0	1
ENSMUSG00000032215	1630.73	1869.72	1433.64	899.26	0	0	-1	0	-1	0	1
ENSMUSG00000058325	2522.41	2841	2134.85	1478.37	0	0	-1	0	-1	0	1
ENSMUSG00000028149	1109.75	1077.42	838.505	534.212	0	0	-1	0	-1	0	1
ENSMUSG00000028907	1674.72	1653.24	1450.21	897.728	0	0	-1	0	-1	0	1
ENSMUSG00000006542	13.4573	20.5168	9.71039	0.436935	0	0	-1	0	-1	0	1
ENSMUSG00000029026	259.847	305.614	110.749	28.223	0	0	-1	0	-1	0	1
ENSMUSG00000029377	2767.65	3478.77	1215.9	398.309	0	0	-1	0	-1	0	1
ENSMUSG00000043155	21.4373	30.6813	6.01645	1.8868	0	0	-1	0	-1	0	1
ENSMUSG00000050296	9583.33	11982.2	2055.12	274.334	0	0	-1	0	-1	0	1
ENSMUSG00000074199	198556	226010	47764.7	6500.19	0	0	-1	0	-1	0	1
ENSMUSG00000032198	258.24	280.971	89.6149	78.6516	0	0	-1	0	-1	0	1
ENSMUSG00000000861	354.466	384.417	66.2597	41.7697	0	0	-1	0	-1	0	1
ENSMUSG00000028072	13.9935	15.1559	0.882763	0	0	0	-1	0	-1	0	1
ENSMUSG00000056880	960.124	1014.81	10.4171	0	0	0	-1	0	-1	0	1
ENSMUSG00000028148	7384.87	9770.54	337.736	50.1118	0	0	-1	0	-1	0	1
ENSMUSG00000030483	4026.05	5374.25	133.082	31.1039	0	0	-1	0	-1	0	1
ENSMUSG00000006724	19.0485	16.8628	5.13369	0	0	0	-1	0	-1	0	1
ENSMUSG00000053522	11746.7	11471.6	2863.76	530.096	0	0	-1	0	-1	0	1
ENSMUSG00000060962	128640	132807	30499.1	9089.13	0	0	-1	0	-1	0	1
ENSMUSG00000040280	5876.2	4769.06	1584.13	375.451	0	0	-1	0	-1	0	1
ENSMUSG00000050108	7845.71	5560.77	1668.4	302.934	0	0	-1	0	-1	0	1
ENSMUSG00000086319	22.0232	16.3906	4.01316	0.873869	0	0	-1	0	-1	0	1
ENSMUSG00000024936	538.87	463.449	67.0768	48.2645	0	0	-1	0	-1	0	1
ENSMUSG00000055994	292.201	230.283	45.415	31.8387	0	0	-1	0	-1	0	1
ENSMUSG00000053909	21.1889	18.5989	2.81118	0	0	0	-1	0	-1	0	1
ENSMUSG00000087110	22.8822	17.0563	2.00329	0	0	0	-1	0	-1	0	1
ENSMUSG00000005705	26.187	19.1737	9.30973	0.873869	0	0	-1	0	-1	0	1
ENSMUSG00000015709	48.9554	39.2066	20.004	3.75386	0	0	-1	0	-1	0	1
ENSMUSG00000019851	275577	239282	139859	47540.5	0	0	-1	0	-1	0	1
ENSMUSG00000051335	323.986	277.607	205.811	55.573	0	0	-1	0	-1	0	1
ENSMUSG00000063564	356.974	264.375	219.131	26.9328	0	0	-1	0	-1	0	1
ENSMUSG00000007646	100.343	85.0997	26.0757	16.9417	0	0	-1	0	-1	0	1
ENSMUSG00000024235	1196.8	948.384	355.189	211.884	0	0	-1	0	-1	0	1
ENSMUSG00000037933	3930.2	3379.18	1479.77	783.296	0	0	-1	0	-1	0	1
ENSMUSG00000086320	7038.46	5752.22	3099.7	1864.76	0	0	-1	0	-1	0	1
ENSMUSG00000022090	3585.25	2517	1138.25	554.52	0	0	-1	0	-1	0	1
ENSMUSG00000030852	3809.04	2900.37	1324.22	752.302	0	0	-1	0	-1	0	1
ENSMUSG00000030189	9902.24	6559.47	4525.5	2182.31	0	0	-1	0	-1	0	1
ENSMUSG00000051379	10007.2	7217.94	5158.69	2466.34	0	0	-1	0	-1	0	1
ENSMUSG00000053113	681.204	517.471	425.331	176.964	0	0	-1	0	-1	0	1
ENSMUSG00000024846	31286.5	10914.8	4772.88	1293.17	0	0	-1	0	-1	0	1
ENSMUSG00000030366	135.565	41.6026	18.4631	4.03198	0	0	-1	0	-1	0	1
ENSMUSG00000031734	69.307	25.0301	15.1015	1.15199	0	0	-1	0	-1	0	1
ENSMUSG00000028836	39.662	17.1648	5.7038	0	0	0	-1	0	-1	0	1
ENSMUSG00000030353	709.587	285.323	121.544	35.7316	0	0	-1	0	-1	0	1
ENSMUSG00000078507	80.7088	16.1912	9.46606	0	0	0	-1	0	-1	0	1
ENSMUSG00000036411	248.201	136.526	24.8185	11.9363	0	0	-1	0	-1	0	1
ENSMUSG00000002057	141.56	448.047	42.5158	14.8566	0	0	-1	-1	-1	0	1
ENSMUSG00000090637	16.0915	89.9768	6.41711	0	0	0	-1	-1	-1	0	1
ENSMUSG00000005413	6909.21	10711.2	2444.91	2046.64	0	0	-1	-1	-1	0	1
ENSMUSG00000025037	1017.08	1702.31	655.7	407.023	0	0	-1	-1	-1	0	1
ENSMUSG00000038412	3798.8	7043.49	2341.88	1182.21	0	0	-1	-1	-1	0	1
ENSMUSG00000079254	619.144	1389.04	374.844	166.638	0	0	-1	-1	-1	0	1
ENSMUSG00000025348	273.474	464.455	65.1616	17.1598	0	0	-1	-1	-1	0	1
ENSMUSG00000039518	33411.2	68553.8	2442.64	644.124	0	0	-1	-1	-1	0	1
ENSMUSG00000043286	2495.39	5210.26	497.894	86.8563	0	0	-1	-1	-1	0	1
ENSMUSG00000032553	689.281	948.732	426.846	378.635	0	0	-1	-1	-1	0	1
ENSMUSG00000000538	1744.86	2583.79	1027.56	1250.37	0	0	0	-1	0	0	2
ENSMUSG00000022391	1460.21	2207.76	928.015	1094.25	0	0	0	-1	0	0	2
ENSMUSG00000006021	204.332	316.409	121.844	156.963	0	0	0	-1	0	0	2
ENSMUSG00000024875	1944.6	3050.17	1183.3	1492.77	0	0	0	-1	0	0	2
ENSMUSG00000020708	5827.83	9538.94	3794.43	4314.41	0	0	0	-1	0	0	2
ENSMUSG00000024312	128.316	203.848	73.243	105.384	0	0	0	-1	0	0	2
ENSMUSG00000025153	1725.94	2570.14	992.197	1389.62	0	0	0	-1	0	0	2
ENSMUSG00000002280	463.372	633.478	278.995	367.138	0	0	0	-1	0	0	2
ENSMUSG00000020536	643.094	908.924	375.34	514.962	0	0	0	-1	0	0	2
ENSMUSG00000025332	1285.23	1784.17	882.346	1033.23	0	0	0	-1	0	0	2
ENSMUSG00000025353	644.975	841.274	425.578	488.567	0	0	0	-1	0	0	2
ENSMUSG00000028455	1128.42	1628.13	797.903	874.571	0	0	0	-1	0	0	2
ENSMUSG00000033589	1343.34	1790.78	743.395	919.055	0	0	0	-1	0	0	2
ENSMUSG00000071657	2184.77	2891.31	1319.97	1478.08	0	0	0	-1	0	0	2
ENSMUSG00000048832	624.61	766.119	316.171	417.464	0	0	0	-1	0	0	2
ENSMUSG00000064302	2325.91	2964.37	1121.92	1343.53	0	0	0	-1	0	0	2
ENSMUSG00000024096	2558.42	3839.68	1136.38	1974.39	0	0	0	-1	0	0	2
ENSMUSG00000073705	128.668	203.314	53.9852	90.2299	0	0	0	-1	0	0	2
ENSMUSG00000056228	36.9751	51.5852	11.7951	21.7085	0	0	0	-1	0	0	2
ENSMUSG00000001415	237.903	436.114	182.191	222.03	0	0	0	-1	0	0	2
ENSMUSG00000003072	3070.23	5226.95	2265.47	2712.29	0	0	0	-1	0	0	2
ENSMUSG00000078440	290.383	537.583	203.23	276.369	0	0	0	-1	0	0	2
ENSMUSG00000031787	437.381	856.388	342.498	387.573	0	0	0	-1	0	0	2
ENSMUSG00000055762	4224.91	8358.07	3383.14	3953.18	0	0	0	-1	0	0	2
ENSMUSG00000048897	249.145	446.425	172.826	182.05	0	0	0	-1	0	0	2
ENSMUSG00000002052	1604.6	3216.62	1427.84	1831.51	0	0	0	-1	0	0	2
ENSMUSG00000003309	2482.62	5472.37	2018.33	2734.68	0	0	0	-1	0	0	2
ENSMUSG00000025651	6036.43	12818.5	4924.6	6217.61	0	0	0	-1	0	0	2
ENSMUSG00000008140	324.349	758.757	265.388	341.356	0	0	0	-1	0	0	2
ENSMUSG00000042148	284.021	620.724	202.892	274.745	0	0	0	-1	0	0	2
ENSMUSG00000041949	275.079	631.686	211.901	253.529	0	0	0	-1	0	0	2
ENSMUSG00000003235	729.78	1371.44	390.168	784.571	0	0	0	-1	0	0	2
ENSMUSG00000038055	48.086	81.7035	21.6684	50.0904	0	0	0	-1	0	0	2
ENSMUSG00000040767	499.557	851.872	222.887	491.565	0	0	0	-1	0	0	2
ENSMUSG00000018921	231.829	400.714	137.848	228.643	0	0	0	-1	0	0	2
ENSMUSG00000039041	1073.27	1849.18	741.454	1054.04	0	0	0	-1	0	0	2
ENSMUSG00000040356	593.51	998.487	382.636	581.275	0	0	0	-1	0	0	2
ENSMUSG00000019362	1514.73	2307.33	1038.44	1452.98	0	0	0	-1	0	0	2
ENSMUSG00000060032	931.268	1433.43	683.826	921.156	0	0	0	-1	0	0	2
ENSMUSG00000037509	783.849	1195.44	554.7	715.666	0	0	0	-1	0	0	2
ENSMUSG00000025728	823.936	1371.33	586.612	883.849	0	0	0	-1	0	0	2
ENSMUSG00000022463	1233.62	1823.7	696.994	1179.99	0	0	0	-1	0	0	2
ENSMUSG00000029387	1013.5	1455.52	562.2	938.659	0	0	0	-1	0	0	2
ENSMUSG00000024319	587.923	900.7	299.849	550.094	0	0	0	-1	0	0	2
ENSMUSG00000074923	424.684	658.874	235.533	387.788	0	0	0	-1	0	0	2
ENSMUSG00000007721	394.077	890.759	333.022	532.978	0	0	0	-1	0	0	2
ENSMUSG00000021252	1698.64	3414.83	1369.33	2376.45	0	0	0	-1	0	0	2
ENSMUSG00000045062	47.6244	129.031	43.1739	86.0589	0	0	0	-1	0	0	2
ENSMUSG00000005514	2643.65	5731.45	1750.15	3823.23	0	0	0	-1	0	0	2
ENSMUSG00000034634	27747.7	56661.2	15040	37157	0	0	0	-1	0	0	2
ENSMUSG00000037188	3929.52	9192.07	1939.03	5970.99	0	0	0	-1	0	0	2
ENSMUSG00000024065	143.976	301.377	64.2919	228.367	0	0	0	-1	0	0	2
ENSMUSG00000018974	264.427	342.304	164.773	241.215	0	0	0	-1	0	0	2
ENSMUSG00000068663	403.804	512.072	245.578	356.651	0	0	0	-1	0	0	2
ENSMUSG00000024797	208.095	242.981	115.677	216.466	0	0	0	-1	0	0	2
ENSMUSG00000049755	976.746	1084.98	461.508	864.002	0	0	0	-1	0	0	2
ENSMUSG00000059409	450.058	489.535	233.01	390.158	0	0	0	-1	0	0	2
ENSMUSG00000020782	223.924	276.93	77.4414	228.881	0	0	0	-1	0	0	2
ENSMUSG00000019578	819.562	1026.85	422.997	999.15	0	0	0	-1	0	0	2
ENSMUSG00000031155	97.9895	141.131	48.5651	124.332	0	0	0	-1	0	0	2
ENSMUSG00000032583	168.106	243.967	84.4681	207.607	0	0	0	-1	0	0	2
ENSMUSG00000030602	333.028	550.718	204.76	434.959	0	0	0	-1	0	0	2
ENSMUSG00000031708	6447.55	9595.34	2843.48	7081.21	0	0	0	-1	0	0	2
ENSMUSG00000084128	1254.93	1892.39	538.108	1315.92	0	0	0	-1	0	0	2
ENSMUSG00000041000	185.01	345.167	109.456	298.949	0	0	0	-1	0	0	2
ENSMUSG00000024812	1303.84	1993.31	1037.27	1550.79	0	0	0	-1	0	0	2
ENSMUSG00000001211	820.973	1451.77	316.476	434.183	0	0	0	-1	0	0	2
ENSMUSG00000003200	1076.17	1940.98	571.547	786.32	0	0	0	-1	0	0	2
ENSMUSG00000005148	746	1541.2	465.924	624.875	0	0	0	-1	0	0	2
ENSMUSG00000024773	238.804	454.035	138.59	227.57	0	0	0	-1	0	0	2
ENSMUSG00000028555	617.003	1403.61	229.248	514.914	0	0	0	-1	0	0	2
ENSMUSG00000042675	169.568	406.121	77.4585	152.875	0	0	0	-1	0	0	2
ENSMUSG00000074489	150.193	291.772	57.8065	122.822	0	0	0	-1	0	0	2
ENSMUSG00000035671	412.472	938.376	217.329	285.135	0	0	0	-1	0	0	2
ENSMUSG00000030340	403.355	685.174	93.4257	365.536	0	0	0	-1	0	0	2
ENSMUSG00000004270	1548.68	4760.23	1216.99	2337.71	0	0	0	-1	0	0	2
ENSMUSG00000020471	262.754	687.438	252.033	255.258	0	0	0	-1	0	0	2
ENSMUSG00000028792	2112.82	5119.36	1580.21	1663.4	0	0	0	-1	0	0	2
ENSMUSG00000004748	37.3725	132.412	16.7791	36.9017	0	0	0	-1	0	0	2
ENSMUSG00000072572	58.3306	207.312	42.0665	44.4094	0	0	0	-1	0	0	2
ENSMUSG00000029838	202.607	479.394	50.617	93.5099	0	0	0	-1	0	0	2
ENSMUSG00000032323	44.5607	103.062	10.9255	16.4653	0	0	0	-1	0	0	2
ENSMUSG00000032091	1359.41	3168.21	299.141	805.196	0	0	0	-1	0	0	2
ENSMUSG00000073940	840.211	1832.79	320.493	377.716	0	0	0	-1	0	0	2
ENSMUSG00000071112	32.0018	90.8769	4.00659	9.17563	0	0	0	-1	0	0	2
ENSMUSG00000097138	4.77455	10.449	0	3.89292	0	0	0	-1	0	0	2
ENSMUSG00000097467	4.89875	9.68652	0	3.19761	0	0	0	-1	0	0	2
ENSMUSG00000003863	157.531	190.252	34.8153	54.6992	0	0	0	-1	0	0	2
ENSMUSG00000037681	844.532	1143.42	217.111	358.449	0	0	0	-1	0	0	2
ENSMUSG00000029512	729.774	753.309	284.635	364.04	0	0	0	-1	0	0	2
ENSMUSG00000031134	1109.09	1208.12	634.027	687.283	0	0	0	-1	0	0	2
ENSMUSG00000074647	132.891	568.74	72.3668	359.084	0	0	0	-1	0	0	2
ENSMUSG00000095026	5.90686	37.7783	2.72973	26.5749	0	0	0	-1	0	0	2
ENSMUSG00000093651	1.79265	9.00911	0	4.3496	0	0	0	-1	0	0	2
ENSMUSG00000010342	3.61015	26.3791	0.482104	2.32374	0	0	0	-1	0	0	2
ENSMUSG00000079563	14.0111	67.3952	6.10446	9.79195	0	0	0	-1	0	0	2
ENSMUSG00000000915	846.108	1447.19	293.696	1545.93	0	0	0	-1	0	1	3
ENSMUSG00000040703	543.83	1038.24	240.675	1166.56	0	0	0	-1	0	1	3
ENSMUSG00000005986	57.3867	113.757	29.4241	107.27	0	0	0	-1	0	1	3
ENSMUSG00000031813	333.233	601.756	206.622	565.548	0	0	0	-1	0	1	3
ENSMUSG00000015478	160.147	365.291	119.411	365.684	0	0	0	-1	0	1	3
ENSMUSG00000026447	45.484	104.49	28.9617	111.044	0	0	0	-1	0	1	3
ENSMUSG00000022546	393.725	956.665	161.291	739.719	0	0	0	-1	0	1	3
ENSMUSG00000030800	1483.14	3811.95	694.084	3178.73	0	0	0	-1	0	1	3
ENSMUSG00000025885	665.809	1259.96	320.112	939.036	0	0	0	-1	0	1	3
ENSMUSG00000019302	2472.64	2954.44	1274.83	3492.46	0	0	0	-1	0	1	3
ENSMUSG00000022964	4337.89	6182.76	2265.82	6683	0	0	0	-1	0	1	3
ENSMUSG00000041444	1622.67	2181.37	859.325	2512.76	0	0	0	-1	0	1	3
ENSMUSG00000034282	971.938	1329.17	363.175	1154.43	0	0	0	-1	0	1	3
ENSMUSG00000045775	1.71813	8.53692	0	18.4508	0	0	0	-1	0	1	3
ENSMUSG00000074075	0.908747	8.91817	0	13.0488	0	0	0	-1	0	1	3
ENSMUSG00000075296	1192.83	4199.63	724.237	5301.48	0	0	0	-1	0	1	3
ENSMUSG00000086962	8.96327	27.8924	4.41381	30.6068	0	0	0	-1	0	1	3
ENSMUSG00000003378	0.908747	0	0	9.8512	0	0	0	0	0	1	3
ENSMUSG00000003379	21.6857	2.01472	3.37473	295.348	0	0	0	0	0	1	3
ENSMUSG00000020672	2.27187	0.574801	0	21.6484	0	0	0	0	0	1	3
ENSMUSG00000050447	36.0094	15.7307	0	356.976	0	0	0	0	0	1	3
ENSMUSG00000032827	19.8682	9.77161	0	256.223	0	0	0	0	0	1	3
ENSMUSG00000060212	3.53563	1.1496	0.482104	45.2627	0	0	0	0	0	1	3
ENSMUSG00000032053	16.8118	13.2321	0.482104	190.079	0	0	0	0	0	1	3
ENSMUSG00000039865	74.7771	48.682	51.0597	809.564	0	0	0	0	0	1	3
ENSMUSG00000024353	15.8782	5.5603	0.482104	879.548	0	0	0	0	0	1	3
ENSMUSG00000076550	0.454374	0	0	12.6719	0	0	0	0	0	1	3
ENSMUSG00000024366	5.75782	4.02945	0	162.54	0	0	0	0	0	1	3
ENSMUSG00000073207	0.908747	1.1496	0	28.1029	0	0	0	0	0	1	3
ENSMUSG00000027457	2.27187	0	0	12.1749	0	0	0	0	0	1	3
ENSMUSG00000031760	2.27187	0.574801	0	15.5519	0	0	0	0	0	1	3
ENSMUSG00000071636	5.8075	3.2611	1.20198	43.1578	0	0	0	0	0	1	3
ENSMUSG00000042118	51.4726	8.24076	8.26408	217.117	0	0	0	0	0	1	3
ENSMUSG00000028909	36.8115	119.288	24.7857	463.768	0	0	0	0	0	1	3
ENSMUSG00000040412	2.22219	9.29943	1.20198	21.3111	0	0	0	0	0	1	3
ENSMUSG00000007659	3280.35	2945.7	2299.19	5605.53	0	0	0	0	0	1	3
ENSMUSG00000019338	118.369	98.4695	85.4191	217.38	0	0	0	0	0	1	3
ENSMUSG00000026979	745.101	808.859	586.43	1489.18	0	0	0	0	0	1	3
ENSMUSG00000030319	118.6	125.781	107.563	262.09	0	0	0	0	0	1	3
ENSMUSG00000036617	1469.82	1488.23	1096.31	3263.4	0	0	0	0	0	1	3
ENSMUSG00000094686	65.1069	56.2395	38.7246	138.219	0	0	0	0	0	1	3
ENSMUSG00000010358	484.554	508.999	283.787	825.381	0	0	0	0	0	1	3
ENSMUSG00000025578	57.6672	46.1217	27.7597	86.6151	0	0	0	0	0	1	3
ENSMUSG00000022214	2147.79	1488.07	1043.15	3870.91	0	0	0	0	0	1	3
ENSMUSG00000026307	187.324	128.359	112.639	316.693	0	0	0	0	0	1	3
ENSMUSG00000022791	137.112	205.892	145.075	385.324	0	0	0	0	0	1	3
ENSMUSG00000025731	238.839	301.18	92.3709	528.281	0	0	0	0	0	1	3
ENSMUSG00000026860	605.741	743.449	314.497	1469.94	0	0	0	0	0	1	3
ENSMUSG00000028378	8743.74	10842.2	5448.46	19190.3	0	0	0	0	0	1	3
ENSMUSG00000057411	403.427	523.662	314.706	869.044	0	0	0	0	0	1	3
ENSMUSG00000009647	877.425	564.517	437.719	1857.12	0	0	0	0	0	1	3
ENSMUSG00000048240	41.4194	25.5991	22.6326	87.6289	0	0	0	0	0	1	3
ENSMUSG00000020538	616.333	437.873	321.705	1465.21	0	0	0	0	0	1	3
ENSMUSG00000024646	5205.71	3436.75	2575.6	12082.8	0	0	0	0	0	1	3
ENSMUSG00000024892	658.891	405.371	281.261	1517.97	0	0	0	0	0	1	3
ENSMUSG00000028089	457.846	283.258	168.621	1025.37	0	0	0	0	0	1	3
ENSMUSG00000024132	757.427	575.802	454.7	1983.63	0	0	0	0	0	1	3
ENSMUSG00000030882	18.058	17.2557	11.7137	50.8647	0	0	0	0	0	1	3
ENSMUSG00000028031	40.1981	34.2211	17.1666	104.271	0	0	0	0	0	1	3
ENSMUSG00000027950	16.8688	6.51636	5.86013	33.2679	0	0	0	0	0	1	3
ENSMUSG00000017412	19.0485	22.1444	7.61908	51.6192	0	0	0	0	0	1	3
ENSMUSG00000028621	140.37	127.626	48.8449	320.931	0	0	0	0	0	1	3
ENSMUSG00000030246	1220.17	1868.69	577.052	4474.97	0	0	0	0	0	1	3
ENSMUSG00000086390	96.3853	146.703	61.796	359.52	0	0	0	0	0	1	3
ENSMUSG00000045259	3.51079	4.50747	0.482104	11.4599	0	0	0	0	0	1	3
ENSMUSG00000020599	20.4292	5.36675	5.13369	53.6442	0	0	0	0	0	1	3
ENSMUSG00000037224	10.8304	3.64235	2.24763	27.6273	0	0	0	0	0	1	3
ENSMUSG00000020810	70.1443	33.9483	17.4175	206.682	0	0	0	0	0	1	3
ENSMUSG00000029772	1600.75	797.343	398.25	5113.5	0	0	0	0	0	1	3
ENSMUSG00000022756	247.626	137.573	82.5265	716.436	0	0	0	0	0	1	3
ENSMUSG00000032513	312.257	160.879	156.049	882.534	0	0	0	0	0	1	3
ENSMUSG00000071064	93.7687	57.3216	55.6403	278.649	0	0	0	0	0	1	3
ENSMUSG00000049295	44.9799	31.74	24.2221	127.904	0	0	0	0	0	1	3
ENSMUSG00000037110	416.989	238.768	142.926	1026.09	0	0	0	0	0	1	3
ENSMUSG00000021120	302.857	226.782	239.348	1513	0	0	0	0	0	1	3
ENSMUSG00000036775	1707.92	1359.61	775.017	7286.51	0	0	0	0	0	1	3
ENSMUSG00000049690	61.444	41.7169	9.94816	234.674	0	0	0	0	0	1	3
ENSMUSG00000084862	9.11957	5.08227	1.76553	36.2261	0	0	0	0	0	1	3
ENSMUSG00000061013	13.7875	7.18793	0.964208	44.2901	0	0	0	0	0	1	3
ENSMUSG00000064202	13.6064	9.58975	0	49.2165	0	0	0	0	0	1	3
ENSMUSG00000025207	19.0164	18.8892	4.89592	115.728	0	0	0	0	0	1	3
ENSMUSG00000031790	50.2834	58.1191	30.2386	366.729	0	0	0	0	0	1	3
ENSMUSG00000033059	608.992	863.887	507.796	4902.85	0	0	0	0	0	1	3
ENSMUSG00000028801	8.53374	6.23188	0	50.5256	0	0	0	0	0	1	3
ENSMUSG00000026959	3.15578	3.8359	0	12.9492	0	0	0	0	0	1	3
ENSMUSG00000048096	77.3501	58.779	8.59643	244.089	0	0	0	0	0	1	3
ENSMUSG00000032278	2774.44	542.086	77.7738	8829.42	0	0	0	0	0	1	3
ENSMUSG00000087424	9.46733	1.1496	0.801318	28.0239	0	0	0	0	0	1	3
ENSMUSG00000063529	4.54374	0	0	13.3072	0	0	0	0	0	1	3
ENSMUSG00000066964	11.5902	0	0	27.0719	0	0	0	0	0	1	3
ENSMUSG00000010797	92.1748	11.496	2.80461	143.656	0	0	0	0	0	1	3
ENSMUSG00000025576	14.4903	1.1496	0	27.0505	0	0	0	0	0	1	3
ENSMUSG00000026443	9.36797	0.574801	0	15.8687	0	0	0	0	0	1	3
ENSMUSG00000026888	20.0742	4.60425	2.24763	41.271	0	0	0	0	0	1	3
ENSMUSG00000058945	8.66519	2.49275	0.400659	12.9097	0	0	0	0	0	1	3
ENSMUSG00000035129	1.2886	5.08227	0	7.68627	0	0	0	0	0	1	3
ENSMUSG00000017307	125.046	142.702	40.7634	179.307	0	0	0	0	0	1	3
ENSMUSG00000026991	1204.58	1157.14	653.976	1408.31	0	0	0	0	0	1	3
ENSMUSG00000060477	1118.82	1105.76	610.924	1326.42	0	0	0	0	0	1	3
ENSMUSG00000031862	231.499	244.894	145.753	303.002	0	0	0	0	0	1	3
ENSMUSG00000069631	413.296	438.827	275.858	524.217	0	0	0	0	0	1	3
ENSMUSG00000043909	405.937	386.148	263.913	503.145	0	0	0	0	0	1	3
ENSMUSG00000028906	1952.13	1980.7	861.604	2329.11	0	0	0	0	0	1	3
ENSMUSG00000029705	1640.36	1635.19	1283.71	2545.57	0	0	0	0	0	1	3
ENSMUSG00000045211	263.65	265.683	213.537	420.82	0	0	0	0	0	1	3
ENSMUSG00000037847	169.04	199.347	153.962	303.003	0	0	0	0	0	1	3
ENSMUSG00000034951	692.408	846.529	514.865	1099.53	0	0	0	0	0	1	3
ENSMUSG00000023939	983.106	1615.69	925.976	1984.26	0	0	0	0	0	1	3
ENSMUSG00000062729	172.191	312.209	134.03	394.086	0	0	0	0	0	1	3
ENSMUSG00000032609	44.806	29.6344	11.313	58.2522	0	0	0	0	0	1	3
ENSMUSG00000032657	53.5312	25.121	10.5932	68.2227	0	0	0	0	0	1	3
ENSMUSG00000042419	14.068	10.3581	3.76882	23.7936	0	0	0	0	0	1	3
ENSMUSG00000036879	1627.83	592.906	532.244	1825.51	0	0	0	0	0	1	3
ENSMUSG00000052911	299.225	86.6656	66.3832	364.189	0	0	0	0	0	1	3
ENSMUSG00000097284	40.0812	13.0386	9.79184	54.5782	0	0	0	0	0	1	3
ENSMUSG00000087303	115.892	29.9188	11.4693	140.738	0	0	0	0	0	1	3
ENSMUSG00000079344	66.2476	14.672	4.25092	60.339	0	0	0	0	0	1	3
ENSMUSG00000000088	795.964	1864.77	986.104	1365.72	1	0	0	0	0	0	4
ENSMUSG00000018286	2628.64	6587.42	3103.41	4634.83	1	0	0	0	0	0	4
ENSMUSG00000030432	3397.51	9097.02	4335.39	6491.33	1	0	0	0	0	0	4
ENSMUSG00000022711	1315.8	3693.61	1823.4	2510.15	1	0	0	0	0	0	4
ENSMUSG00000007338	502.049	1074.22	579.393	712.062	1	0	0	0	0	0	4
ENSMUSG00000026127	1042.59	2168.78	1229.83	1331.7	1	0	0	0	0	0	4
ENSMUSG00000044894	2176.47	4874.62	2686.34	2837.06	1	0	0	0	0	0	4
ENSMUSG00000052738	1871.85	4251.38	2263.25	2439.36	1	0	0	0	0	0	4
ENSMUSG00000022841	6495.15	14326.3	8707.25	8941.25	1	0	0	0	0	0	4
ENSMUSG00000060288	512.5	1123.05	712.722	711.871	1	0	0	0	0	0	4
ENSMUSG00000027671	829.057	1792.21	1169.23	1066.35	1	0	0	0	0	0	4
ENSMUSG00000033940	4309.71	9458.45	6408.94	6047.06	1	0	0	0	0	0	4
ENSMUSG00000014959	1769.07	3208.83	1968.7	2213.11	1	0	0	0	0	0	4
ENSMUSG00000037419	2684.95	4989.98	3019.09	3061.15	1	0	0	0	0	0	4
ENSMUSG00000002014	2693.3	7837.88	4624.47	5515.55	1	0	0	0	0	0	4
ENSMUSG00000019188	468.944	1303.8	750.344	884.215	1	0	0	0	0	0	4
ENSMUSG00000022174	1949.9	4984.16	3014.92	3602.01	1	0	0	0	0	0	4
ENSMUSG00000027429	2258.52	5436.83	3323.31	3906.08	1	0	0	0	0	0	4
ENSMUSG00000031077	144.688	357.751	220.68	255.198	1	0	0	0	0	0	4
ENSMUSG00000034880	223.177	600.304	388.634	424.414	1	0	0	0	0	0	4
ENSMUSG00000004849	1206.76	3675.62	1961.29	2247.73	1	0	0	0	0	0	4
ENSMUSG00000032802	428.688	1255.06	690.263	760.417	1	0	0	0	0	0	4
ENSMUSG00000071866	12066.3	32118.1	17923.6	20061.6	1	0	0	0	0	0	4
ENSMUSG00000079426	3943.23	10730.3	6424.06	6846.86	1	0	0	0	0	0	4
ENSMUSG00000022193	1001.31	2550.21	1352.87	1630.81	1	0	0	0	0	0	4
ENSMUSG00000059363	88.0109	211.423	112.512	137.023	1	0	0	0	0	0	4
ENSMUSG00000037461	633.023	1604.27	881.662	1073.22	1	0	0	0	0	0	4
ENSMUSG00000025747	556.598	1620.79	783.42	982.859	1	0	0	0	0	0	4
ENSMUSG00000033021	515.054	1506.35	647.777	908.8	1	0	0	0	0	0	4
ENSMUSG00000039640	393.228	1218.39	521.991	721.043	1	0	0	0	0	0	4
ENSMUSG00000007476	1189.57	2965.56	1853.61	1729.22	1	0	0	0	0	0	4
ENSMUSG00000025157	158.873	400.121	245.356	233.131	1	0	0	0	0	0	4
ENSMUSG00000020219	949.244	2446.16	1525.96	1398.26	1	0	0	0	0	0	4
ENSMUSG00000059552	1725.81	4104.45	2645.1	2485	1	0	0	0	0	0	4
ENSMUSG00000021474	828.715	2202.55	1406.3	1338.91	1	0	0	0	0	0	4
ENSMUSG00000035498	1143.82	3067.65	1930.9	1887.81	1	0	0	0	0	0	4
ENSMUSG00000032059	187.619	492.649	303.54	310.63	1	0	0	0	0	0	4
ENSMUSG00000041870	349.091	872.773	553.209	559.597	1	0	0	0	0	0	4
ENSMUSG00000019432	2518.78	6394.62	4404.38	3767.27	1	0	0	0	0	0	4
ENSMUSG00000025102	278.669	700.806	528.443	419.67	1	0	0	0	0	0	4
ENSMUSG00000022234	10216.1	21842.5	14740.5	12018.9	1	0	0	0	0	0	4
ENSMUSG00000037531	255.161	534.147	373.825	289.457	1	0	0	0	0	0	4
ENSMUSG00000030738	6211.34	14087.9	9612.23	7979.97	1	0	0	0	0	0	4
ENSMUSG00000010376	1854.49	3657.3	2525.29	2428.78	1	0	0	0	0	0	4
ENSMUSG00000023072	257.423	500.679	346.697	330.194	1	0	0	0	0	0	4
ENSMUSG00000078974	2290.87	4542.86	3184.55	2833.96	1	0	0	0	0	0	4
ENSMUSG00000015120	2063.89	3675	2727.14	2587.39	1	0	0	0	0	0	4
ENSMUSG00000035227	4903.92	8764.68	7057.38	6522.49	1	0	0	0	0	0	4
ENSMUSG00000034729	662.328	1273.22	928.6	945.215	1	0	0	0	0	0	4
ENSMUSG00000040112	765.41	1490.13	1114.35	1044.96	1	0	0	0	0	0	4
ENSMUSG00000049299	1008.72	2112.53	1556.87	1480.6	1	0	0	0	0	0	4
ENSMUSG00000020922	1407.49	2697.22	2134.15	1776.29	1	0	0	0	0	0	4
ENSMUSG00000034345	1262.32	2651.04	2105.85	1730.03	1	0	0	0	0	0	4
ENSMUSG00000037152	1382.28	2892.21	2221.86	1922.32	1	0	0	0	0	0	4
ENSMUSG00000020736	515.498	1080.08	732.025	793.281	1	0	0	0	0	0	4
ENSMUSG00000021494	355.828	808.621	532.177	576.196	1	0	0	0	0	0	4
ENSMUSG00000039771	400.185	811.616	536.13	558.261	1	0	0	0	0	0	4
ENSMUSG00000036850	626.889	1249.32	936.476	1000.81	1	0	0	0	0	0	4
ENSMUSG00000055041	399.146	793.656	608.933	633.759	1	0	0	0	0	0	4
ENSMUSG00000000399	4137.15	8839.57	4361.25	4913.78	1	0	0	0	0	0	4
ENSMUSG00000022956	5076.04	11600.6	5247.85	6302.26	1	0	0	0	0	0	4
ENSMUSG00000025817	1807.52	4210.01	1920.18	2511.13	1	0	0	0	0	0	4
ENSMUSG00000063511	409.846	1038.4	509.139	616.439	1	0	0	0	0	0	4
ENSMUSG00000001924	4317.21	11575.4	5392.7	5629.47	1	0	0	0	0	0	4
ENSMUSG00000040688	669.485	1847.26	867.255	922.954	1	0	0	0	0	0	4
ENSMUSG00000021951	572.648	1533.59	755.912	755.696	1	0	0	0	0	0	4
ENSMUSG00000022748	225.9	578.984	289.734	294.623	1	0	0	0	0	0	4
ENSMUSG00000035754	548.55	1572.24	761.978	771.23	1	0	0	0	0	0	4
ENSMUSG00000014856	609.473	1590.61	800.825	846.945	1	0	0	0	0	0	4
ENSMUSG00000034330	262.243	719.973	339.026	388.111	1	0	0	0	0	0	4
ENSMUSG00000030847	1033	2805.92	1518.92	1427.43	1	0	0	0	0	0	4
ENSMUSG00000002343	90.8541	283.901	140.782	129.318	1	0	0	0	0	0	4
ENSMUSG00000071644	17138.3	48039.2	22394.1	21074.3	1	0	0	0	0	0	4
ENSMUSG00000006024	4596.34	15006.9	6422.88	6806.24	1	0	0	0	0	0	4
ENSMUSG00000057440	1203.45	3629.67	1563.83	1668.88	1	0	0	0	0	0	4
ENSMUSG00000012535	2174.32	5323.89	2778.64	2404.84	1	0	0	0	0	0	4
ENSMUSG00000031960	1218.42	3099.68	1613.84	1423.98	1	0	0	0	0	0	4
ENSMUSG00000030007	7090.26	18398.2	9827.06	7366.63	1	0	0	0	0	0	4
ENSMUSG00000014867	3538.55	8408.64	4666.92	4357.49	1	0	0	0	0	0	4
ENSMUSG00000032498	216.239	493.45	295.063	263.139	1	0	0	0	0	0	4
ENSMUSG00000024816	377.766	965.307	541.827	538.025	1	0	0	0	0	0	4
ENSMUSG00000031879	274.778	663.203	354.58	368.786	1	0	0	0	0	0	4
ENSMUSG00000043866	109.942	281.722	150.832	155.852	1	0	0	0	0	0	4
ENSMUSG00000029198	2472.91	6124.7	3428	3676.27	1	0	0	0	0	0	4
ENSMUSG00000029715	247.564	586.444	326.455	355.737	1	0	0	0	0	0	4
ENSMUSG00000039183	774.102	1895.19	994.974	1116.67	1	0	0	0	0	0	4
ENSMUSG00000028910	392.813	784.199	444.153	410.236	1	0	0	0	0	0	4
ENSMUSG00000002308	124.148	364.323	150.646	200.699	1	0	0	0	0	0	4
ENSMUSG00000026201	388.387	1132.74	478.848	579.341	1	0	0	0	0	0	4
ENSMUSG00000023272	366.024	1281.34	519.75	727.809	1	0	0	0	0	0	4
ENSMUSG00000078695	214.587	766.275	280.677	390.072	1	0	0	0	0	0	4
ENSMUSG00000030612	670.7	2139.94	1053.25	1168.87	1	0	0	0	0	0	4
ENSMUSG00000024121	541.868	2120.95	791.57	1294.69	1	0	0	0	0	0	4
ENSMUSG00000045319	50.39	218.391	76.6401	122.444	1	0	0	0	0	0	4
ENSMUSG00000053644	254.674	1272.95	501.144	666.983	1	0	0	0	0	0	4
ENSMUSG00000054836	46.9961	212.391	89.4323	107.349	1	0	0	0	0	0	4
ENSMUSG00000001039	80.4532	306.934	193.537	184.493	1	0	0	0	0	0	4
ENSMUSG00000018293	6241.3	24050.1	14875.9	15290.3	1	0	0	0	0	0	4
ENSMUSG00000036751	4842.27	15496.6	9111.36	9220.38	1	0	0	0	0	0	4
ENSMUSG00000071014	318.199	952.709	614.959	614.985	1	0	0	0	0	0	4
ENSMUSG00000020089	1179.04	5381.71	3160.5	3519.94	1	0	0	0	0	0	4
ENSMUSG00000020277	1781.45	7848.58	4044.18	4680.45	1	0	0	0	0	0	4
ENSMUSG00000021773	15.5553	65.9669	34.6524	38.809	1	0	0	0	0	0	4
ENSMUSG00000056394	337.178	1554.3	758.867	893.118	1	0	0	0	0	0	4
ENSMUSG00000027224	919.265	4663.25	2523.44	2646.11	1	0	0	0	0	0	4
ENSMUSG00000030611	274.745	1102.14	508.269	652.805	1	0	0	0	0	0	4
ENSMUSG00000079478	138.379	519.87	236.519	290.353	1	0	0	0	0	0	4
ENSMUSG00000030689	95.7849	385.637	185.872	201.076	1	0	0	0	0	0	4
ENSMUSG00000046157	192.173	780.448	348.392	400.79	1	0	0	0	0	0	4
ENSMUSG00000024066	1066.83	3771.71	1856.42	2416.54	1	0	0	0	0	0	4
ENSMUSG00000030339	438.272	1451.08	784.887	951.936	1	0	0	0	0	0	4
ENSMUSG00000003444	332.029	1075.58	595.304	580.986	1	0	0	0	0	0	4
ENSMUSG00000032026	703.995	2406.75	1308.79	1285.94	1	0	0	0	0	0	4
ENSMUSG00000030058	2127.12	6942.06	3840.19	3573.76	1	0	0	0	0	0	4
ENSMUSG00000008036	509.028	1949.87	1090.92	1088.85	1	0	0	0	0	0	4
ENSMUSG00000076441	1169.6	4982.04	2602.08	2675.83	1	0	0	0	0	0	4
ENSMUSG00000023104	456.653	1689.43	880.644	816.093	1	0	0	0	0	0	4
ENSMUSG00000030752	31.1924	141.905	75.3015	69.7532	1	0	0	0	0	0	4
ENSMUSG00000030978	1829.42	7788.65	4117.37	3658.22	1	0	0	0	0	0	4
ENSMUSG00000048677	92.7037	391.092	203.452	186.122	1	0	0	0	0	0	4
ENSMUSG00000040824	1405.41	6019.42	3020.52	2864.92	1	0	0	0	0	0	4
ENSMUSG00000021486	3381.42	12611.1	7672.41	6498.49	1	0	0	0	0	0	4
ENSMUSG00000034789	80.5919	291.106	187.309	152.159	1	0	0	0	0	0	4
ENSMUSG00000030225	785.325	2557.4	1562.67	1317.02	1	0	0	0	0	0	4
ENSMUSG00000024906	70.961	305.42	181.979	164.292	1	0	0	0	0	0	4
ENSMUSG00000026864	12815.2	47160	28740.8	26164.9	1	0	0	0	0	0	4
ENSMUSG00000023982	27.6247	186.569	111.717	104.294	1	0	0	0	0	0	4
ENSMUSG00000026271	69.5482	616.199	391.655	291.454	1	0	0	0	0	0	4
ENSMUSG00000083836	1.74297	27.7106	17.1048	12.9896	1	0	0	0	0	0	4
ENSMUSG00000041920	189.941	1685.8	936.811	788.455	1	0	0	0	0	0	4
ENSMUSG00000055313	20.8412	133.048	70.5461	59.3441	1	0	0	0	0	0	4
ENSMUSG00000001525	4403.18	12127	8284.09	6100.06	1	0	0	0	0	0	4
ENSMUSG00000042694	563.749	1645.31	1082.28	764.091	1	0	0	0	0	0	4
ENSMUSG00000021890	712.647	1758.96	1232.16	916.628	1	0	0	0	0	0	4
ENSMUSG00000030435	278.264	703.419	460.299	359.769	1	0	0	0	0	0	4
ENSMUSG00000047721	378.181	947.218	619.28	503.066	1	0	0	0	0	0	4
ENSMUSG00000006728	1877.04	5619.36	4056.77	3035.84	1	0	0	0	0	0	4
ENSMUSG00000037104	420.907	1193.36	875.178	640.697	1	0	0	0	0	0	4
ENSMUSG00000053460	270.287	745.843	534.714	389.399	1	0	0	0	0	0	4
ENSMUSG00000032383	1719.04	5030.75	3403.55	2700.47	1	0	0	0	0	0	4
ENSMUSG00000030530	322.892	1058.25	733.919	529.046	1	0	0	0	0	0	4
ENSMUSG00000039745	1132.82	4010.92	2751.52	2205.87	1	0	0	0	0	0	4
ENSMUSG00000021116	3887.58	9661.99	7776.51	4630.91	1	0	0	0	0	0	4
ENSMUSG00000028261	558.3	1518.12	1213.57	692.144	1	0	0	0	0	0	4
ENSMUSG00000042487	567.143	1220.32	1042.07	627.044	1	0	0	0	0	0	4
ENSMUSG00000068039	6592.71	13967.2	10708.7	6956.97	1	0	0	0	0	0	4
ENSMUSG00000024145	291.001	746.673	606.394	432.361	1	0	0	0	0	0	4
ENSMUSG00000031167	6975.05	15016.5	12773.9	9056.11	1	0	0	0	0	0	4
ENSMUSG00000062580	2485.37	4955.13	4129.29	3165.14	1	0	0	0	0	0	4
ENSMUSG00000020803	6071.11	16857.8	11724.3	6664.5	1	0	0	0	0	0	4
ENSMUSG00000084159	158.929	387.11	243.158	172.655	1	0	0	0	0	0	4
ENSMUSG00000027698	619.201	1835.26	1620.63	914.038	1	0	0	0	0	0	4
ENSMUSG00000041836	622.401	1887.52	1594.38	828.767	1	0	0	0	0	0	4
ENSMUSG00000062070	4987.99	19426.4	18030.7	8351.63	1	0	0	0	0	0	4
ENSMUSG00000092074	16.2902	100.587	97.8698	45.4437	1	0	0	0	0	0	4
ENSMUSG00000001082	350.889	892.92	625.079	672.681	1	0	0	0	0	0	4
ENSMUSG00000032018	2156.05	5508.64	4052.76	4198.7	1	0	0	0	0	0	4
ENSMUSG00000006095	1220.57	2958.12	2014.56	2304.32	1	0	0	0	0	0	4
ENSMUSG00000028843	2221.72	5371.14	3878.35	4272.1	1	0	0	0	0	0	4
ENSMUSG00000025470	163.647	433.164	330.664	349.603	1	0	0	0	0	0	4
ENSMUSG00000028164	218.79	643.435	479.089	500.479	1	0	0	0	0	0	4
ENSMUSG00000040158	446.229	1270.57	964.252	1016.16	1	0	0	0	0	0	4
ENSMUSG00000031622	1123.6	2587.19	2118.01	2347.9	1	0	0	0	0	0	4
ENSMUSG00000006736	1106.29	2784.32	2313.29	1969.04	1	0	0	0	0	0	4
ENSMUSG00000030469	337.507	863.094	707.29	616.3	1	0	0	0	0	0	4
ENSMUSG00000020267	5178.17	12206.8	9872.83	9160.79	1	0	0	0	0	0	4
ENSMUSG00000021290	1276.38	2663.42	2149.28	1972.27	1	0	0	0	0	0	4
ENSMUSG00000021361	1837.43	3881.5	3146.49	2849.06	1	0	0	0	0	0	4
ENSMUSG00000018770	2866.19	8759.09	6909.64	6447.21	1	0	0	0	0	0	4
ENSMUSG00000031328	3368.81	10104.2	7871.89	6726.24	1	0	0	0	0	0	4
ENSMUSG00000006050	1361.72	2649.96	2241.97	2179.57	1	0	0	0	0	0	4
ENSMUSG00000015289	588.04	1049.64	936.967	946.132	1	0	0	0	0	0	4
ENSMUSG00000030990	1705.86	4426.66	4153.72	3057.4	1	0	0	0	0	0	4
ENSMUSG00000053317	1363.27	3820.24	3444.83	2687.04	1	0	0	0	0	0	4
ENSMUSG00000021493	184.952	799.515	665.063	579.772	1	0	0	0	0	0	4
ENSMUSG00000048911	32.126	122.925	95.8336	89.9724	1	0	0	0	0	0	4
ENSMUSG00000024168	76.6474	278.965	240.771	240.327	1	0	0	0	0	0	4
ENSMUSG00000025959	241.193	984.756	749.736	609.623	1	0	0	0	0	0	4
ENSMUSG00000038463	51.5502	220.374	175.726	131.248	1	0	0	0	0	0	4
ENSMUSG00000034023	73.5806	335.201	238.509	178.352	1	0	0	0	0	0	4
ENSMUSG00000036678	583.134	2501.18	1654.84	1191.7	1	0	0	0	0	0	4
ENSMUSG00000097148	86.6478	308.567	243.841	163.937	1	0	0	0	0	0	4
ENSMUSG00000024810	1393.25	7429.94	6143.72	4175.94	1	0	0	0	0	0	4
ENSMUSG00000087213	23.3935	230.413	176.966	115.973	1	0	0	0	0	0	4
ENSMUSG00000000594	2431.69	13405.8	5699.86	6251.52	1	0	0	0	0	0	4
ENSMUSG00000032294	20890	132880	59221.4	59505.8	1	0	0	0	0	0	4
ENSMUSG00000025403	801.408	5017.96	1993.81	2199.95	1	0	0	0	0	0	4
ENSMUSG00000033268	247.306	1123.84	420.464	511.616	1	0	0	0	0	0	4
ENSMUSG00000063856	5277.72	22398.2	8917.3	9460.99	1	0	0	0	0	0	4
ENSMUSG00000035842	56.6767	232.11	71.1517	98.1162	1	0	0	0	0	0	4
ENSMUSG00000027333	94.0419	1411.39	547.038	591.865	1	0	0	0	0	0	4
ENSMUSG00000058498	6.18735	65.8643	25.1115	25.3825	1	0	0	0	0	0	4
ENSMUSG00000059040	620.656	5710.98	2149.23	1956.57	1	0	0	0	0	0	4
ENSMUSG00000063524	8912.27	68470.2	29008.5	21692.3	1	0	0	0	0	0	4
ENSMUSG00000036814	102.125	2240.97	672.508	732.807	1	0	0	0	0	0	4
ENSMUSG00000087135	1.36312	47.8344	17.2677	14.0815	1	0	0	0	0	0	4
ENSMUSG00000005575	162.912	1063.59	504.642	408.156	1	0	0	0	0	0	4
ENSMUSG00000057666	5822.56	45650.5	21231.2	17408.6	1	0	0	0	0	0	4
ENSMUSG00000083773	1679.38	12606.1	5502.71	4834.39	1	0	0	0	0	0	4
ENSMUSG00000079311	4.06452	30.3001	14.6878	10.4074	1	0	0	0	0	0	4
ENSMUSG00000035683	96.3356	1000.67	520.531	372.707	1	0	0	0	0	0	4
ENSMUSG00000040543	20.511	178.147	104.563	72.7139	1	0	0	0	0	0	4
ENSMUSG00000006442	95.728	466.135	230.322	182.745	1	0	0	0	0	0	4
ENSMUSG00000014633	199.681	934.35	480.177	380.034	1	0	0	0	0	0	4
ENSMUSG00000013629	308.916	1105.63	604.53	442.964	1	0	0	0	0	0	4
ENSMUSG00000042035	952.01	3664.28	1922.17	1582.88	1	0	0	0	0	0	4
ENSMUSG00000025269	90.2931	273.422	154.952	118.116	1	0	0	0	0	0	4
ENSMUSG00000062797	705.917	2464.78	1512.02	1099.85	1	0	0	0	0	0	4
ENSMUSG00000014837	23.8407	105.772	60.1093	34.559	1	0	0	0	0	0	4
ENSMUSG00000027454	80.4004	294.411	145.636	87.2915	1	0	0	0	0	0	4
ENSMUSG00000020866	0	11.5986	6.41711	6.05785	1	0	0	0	0	0	4
ENSMUSG00000021485	0	34.9043	18.8572	14.9759	1	0	0	0	0	0	4
ENSMUSG00000022227	1.2886	57.3625	22.4369	30.1485	1	0	0	0	0	0	4
ENSMUSG00000032744	5.45248	158.8	56.8515	92.1793	1	0	0	0	0	0	4
ENSMUSG00000065265	0.883907	29.6227	12.5964	13.9827	1	0	0	0	0	0	4
ENSMUSG00000027639	853.782	7527.44	2433.07	4159.78	1	0	0	0	0	0	4
ENSMUSG00000042216	66.8965	604.738	228.054	358.143	1	0	0	0	0	0	4
ENSMUSG00000053038	7.62499	53.8903	23.5154	32.4336	1	0	0	0	0	0	4
ENSMUSG00000075245	0.908747	14.1882	6.09789	8.95758	1	0	0	0	0	0	4
ENSMUSG00000097928	0	9.58975	3.44961	6.49478	1	0	0	0	0	0	4
ENSMUSG00000052565	5.45248	74.3779	20.473	35.7316	1	0	0	0	0	0	4
ENSMUSG00000018585	3385.48	8092.33	3989.72	7325.1	1	0	0	0	0	0	4
ENSMUSG00000019428	613.836	1691.89	755.976	1393.3	1	0	0	0	0	0	4
ENSMUSG00000031924	1540.89	4545.99	2542.05	4414.86	1	0	0	0	0	0	4
ENSMUSG00000027944	938.367	2096.55	1280.66	1714.23	1	0	0	0	0	0	4
ENSMUSG00000033938	842.77	1844.82	1041.8	1537.58	1	0	0	0	0	0	4
ENSMUSG00000036398	1109.86	2238.19	1364.6	2014.41	1	0	0	0	0	0	4
ENSMUSG00000030682	976.447	2151.71	1443.52	1897.4	1	0	0	0	0	0	4
ENSMUSG00000051256	861.04	1674.2	1185	1480.21	1	0	0	0	0	0	4
ENSMUSG00000045948	65.1856	172.313	103.345	141.253	1	0	0	0	0	0	4
ENSMUSG00000059278	141.883	420.539	254.852	339.526	1	0	0	0	0	0	4
ENSMUSG00000034520	12.1687	55.779	31.3039	48.0258	1	0	0	0	0	0	4
ENSMUSG00000057789	28.3596	143.556	90.1916	120.481	1	0	0	0	0	0	4
ENSMUSG00000001403	143.396	2385.9	753.584	391.022	1	0	0	0	0	0	4
ENSMUSG00000030677	101.905	1739.5	583.559	260.51	1	0	0	0	0	0	4
ENSMUSG00000087113	7.80613	101.81	29.8313	14.0025	1	0	0	0	0	0	4
ENSMUSG00000017716	83.5883	1840.26	688.973	256.358	1	0	0	0	0	0	4
ENSMUSG00000017697	62.7502	1895.93	602.873	377.496	1	0	0	0	0	0	4
ENSMUSG00000045876	0.454374	13.6075	4.33237	3.0388	1	0	0	0	0	0	4
ENSMUSG00000058354	7162.11	462002	131547	100834	1	0	0	0	0	0	4
ENSMUSG00000024786	0.454374	24.0624	6.58657	4.03198	1	0	0	0	0	0	4
ENSMUSG00000023505	74.2876	981.53	344.834	211.569	1	0	0	0	0	0	4
ENSMUSG00000025574	201.336	1444.33	555.133	288.552	1	0	0	0	0	0	4
ENSMUSG00000039187	39.9642	312.987	99.6931	57.4006	1	0	0	0	0	0	4
ENSMUSG00000003779	122.136	1650.86	691.779	307.304	1	0	0	0	0	0	4
ENSMUSG00000029177	98.6644	1176.81	508.048	214.529	1	0	0	0	0	0	4
ENSMUSG00000044338	12.4492	169.487	67.1491	30.4085	1	0	0	0	0	0	4
ENSMUSG00000037628	35.406	496.289	212.358	106.44	1	0	0	0	0	0	4
ENSMUSG00000040084	108.43	1217.95	565.079	240.627	1	0	0	0	0	0	4
ENSMUSG00000023015	226.856	1951.3	900.614	303.371	1	0	0	0	0	0	4
ENSMUSG00000023940	78.6471	535.282	259.337	105.742	1	0	0	0	0	0	4
ENSMUSG00000031004	424.931	4262.73	2221.51	704.622	1	0	0	0	0	0	4
ENSMUSG00000014786	0	16.2996	7.05554	1.74774	1	0	0	0	0	0	4
ENSMUSG00000046203	18.9243	18995.8	7731.31	1226.58	1	0	0	0	0	0	4
ENSMUSG00000022445	0	11.3141	3.53105	0.575997	1	0	0	0	0	0	4
ENSMUSG00000074357	0	11.1206	3.6125	0.436935	1	0	0	0	0	0	4
ENSMUSG00000046259	32.332	56631	14637.9	2499.11	1	0	0	0	0	0	4
ENSMUSG00000030867	34.8347	1476.98	372.561	155.996	1	0	0	0	0	0	4
ENSMUSG00000064023	1904.45	64725.6	16242.6	7974.83	1	0	0	0	0	0	4
ENSMUSG00000032783	3.8658	118.69	33.5319	10.8049	1	0	0	0	0	0	4
ENSMUSG00000049971	3.03158	103.056	30.5512	10.368	1	0	0	0	0	0	4
ENSMUSG00000095419	1.36312	29.2473	8.1892	3.17786	1	0	0	0	0	0	4
ENSMUSG00000002835	23.6171	226.614	54.3306	58.1946	1	0	0	0	0	0	4
ENSMUSG00000045667	46.0232	285.848	87.5078	74.5784	1	0	0	0	0	0	4
ENSMUSG00000060860	18.4379	144.398	47.8873	43.5363	1	0	0	0	0	0	4
ENSMUSG00000009185	960.495	6422.04	2155.09	2287.6	1	0	0	0	0	0	4
ENSMUSG00000017861	28.8709	187.179	56.1645	65.8019	1	0	0	0	0	0	4
ENSMUSG00000013155	10.582	64.2484	24.1472	17.637	1	0	0	0	0	0	4
ENSMUSG00000052005	483.191	2856.34	1090.29	811.576	1	0	0	0	0	0	4
ENSMUSG00000023456	6580.2	37869.3	16242.7	11624	1	0	0	0	0	0	4
ENSMUSG00000027737	321.266	1711.82	725.17	566.022	1	0	0	0	0	0	4
ENSMUSG00000026547	3976.4	21879.1	10356.5	7188.55	1	0	0	0	0	0	4
ENSMUSG00000028369	79.7783	426.911	200.19	156.688	1	0	0	0	0	0	4
ENSMUSG00000024050	182.38	731.44	313.591	242.15	1	0	0	0	0	0	4
ENSMUSG00000028886	412.369	1491.65	691.942	598.59	1	0	0	0	0	0	4
ENSMUSG00000022557	544.265	1662.85	678.829	643.327	1	0	0	0	0	0	4
ENSMUSG00000003573	38.0898	233.82	118.143	59.3458	1	0	0	0	0	0	4
ENSMUSG00000021569	99.5483	711.871	436.746	191.845	1	0	0	0	0	0	4
ENSMUSG00000034906	121.795	917.713	552.499	261.004	1	0	0	0	0	0	4
ENSMUSG00000021965	38.2212	281.526	180.572	69.2974	1	0	0	0	0	0	4
ENSMUSG00000051220	108.447	691.563	398.159	168.468	1	0	0	0	0	0	4
ENSMUSG00000026880	2003.86	15198.8	10421.3	4709.68	1	0	0	0	0	0	4
ENSMUSG00000024664	92.6146	570.262	370.659	221.539	1	0	0	0	0	0	4
ENSMUSG00000032436	19.0909	97.2114	64.8161	36.3668	1	0	0	0	0	0	4
ENSMUSG00000027314	9.51701	109.191	73.9274	44.8085	1	0	0	0	0	0	4
ENSMUSG00000017146	64.696	326.999	258.766	92.6541	1	0	0	0	0	0	4
ENSMUSG00000030498	15.0264	76.7855	61.4939	22.3635	1	0	0	0	0	0	4
ENSMUSG00000067586	46.2043	257.369	205.584	96.1315	1	0	0	0	0	0	4
ENSMUSG00000091255	2.7014	31.3412	25.8642	8.97733	1	0	0	0	0	0	4
ENSMUSG00000019942	229.892	2986.53	1807.48	500.482	1	0	0	0	0	0	4
ENSMUSG00000070443	0.883907	13.9037	7.86342	1.8868	1	0	0	0	0	0	4
ENSMUSG00000044022	20.9902	207.353	144.204	28.66	1	0	0	0	0	0	4
ENSMUSG00000045328	146.847	1912.63	1243.09	275.902	1	0	0	0	0	0	4
ENSMUSG00000023902	0	15.0533	8.01974	3.45598	1	0	0	0	0	0	4
ENSMUSG00000077563	0	17.6486	9.54093	4.90585	1	0	0	0	0	0	4
ENSMUSG00000036306	4.49406	108.76	54.487	33.7255	1	0	0	0	0	0	4
ENSMUSG00000046213	0	7.2847	3.93171	0	1	0	0	0	0	0	4
ENSMUSG00000075027	0	18.1208	9.69726	1.74774	1	0	0	0	0	0	4
ENSMUSG00000087383	0	22.816	11.9449	2.30399	1	0	0	0	0	0	4
ENSMUSG00000019214	8.61551	138.462	23.8215	30.0308	1	0	0	0	0	0	4
ENSMUSG00000033256	9.6733	92.4487	19.9909	16.1477	1	0	0	0	0	0	4
ENSMUSG00000041372	11.3169	134.831	27.9778	20.954	1	0	0	0	0	0	4
ENSMUSG00000023041	858.684	449592	70469.8	76490	1	0	0	0	0	0	4
ENSMUSG00000095241	1.33828	72.3014	12.9222	13.2479	1	0	0	0	0	0	4
ENSMUSG00000049539	4.54374	169.375	28.4993	25.3439	1	0	0	0	0	0	4
ENSMUSG00000097519	0.429534	24.9275	4.17605	3.45598	1	0	0	0	0	0	4
ENSMUSG00000046295	0	24.3585	4.73303	3.45598	1	0	0	0	0	0	4
ENSMUSG00000055748	0.429534	120.732	25.7078	25.0246	1	0	0	0	0	0	4
ENSMUSG00000087278	0	32.787	6.41711	8.63996	1	0	0	0	0	0	4
ENSMUSG00000035183	0	13.4256	1.68408	3.31692	1	0	0	0	0	0	4
ENSMUSG00000045539	0.429534	27089.7	2046.21	5663.38	1	0	0	0	0	0	4
ENSMUSG00000022176	2.24703	69.8145	9.61581	4.05173	1	0	0	0	0	0	4
ENSMUSG00000069300	0	13.1353	1.92842	0.436935	1	0	0	0	0	0	4
ENSMUSG00000081056	0	9.58975	1.76553	0.436935	1	0	0	0	0	0	4
ENSMUSG00000087477	0	15.1442	3.04895	0.873869	1	0	0	0	0	0	4
ENSMUSG00000096001	93.0048	9118.18	1934.3	799.365	1	0	0	0	0	0	4
ENSMUSG00000031621	0	44.3915	3.77539	2.18467	1	0	0	0	0	0	4
ENSMUSG00000044430	11.2103	14197.3	1083.63	673.917	1	0	0	0	0	0	4
ENSMUSG00000025197	2.27187	34.6023	4.16948	17.6963	1	0	0	0	0	0	4
ENSMUSG00000085745	0	23.6694	3.53105	8.06396	1	0	0	0	0	0	4
ENSMUSG00000097561	3.51079	55.6205	5.2217	19.1659	1	0	0	0	0	0	4
ENSMUSG00000037977	3.96516	78.6184	11.401	63.6139	1	0	0	0	0	0	4
ENSMUSG00000062148	0	10.6367	2.32907	8.5009	1	0	0	0	0	0	4
ENSMUSG00000097391	0	11.5077	2.16618	8.00389	1	0	0	0	0	0	4
ENSMUSG00000086813	0	22.816	7.21186	23.7335	1	0	0	0	0	0	4
ENSMUSG00000056481	18.9843	86.0967	122.014	46.576	1	0	0	0	0	0	4
ENSMUSG00000010660	731.608	2362.24	413.783	1486.1	1	0	0	-1	0	1	4
ENSMUSG00000034278	80.684	182.933	98.5371	259.687	1	0	1	0	0	1	4
ENSMUSG00000041361	265.333	630.261	350.387	1086.45	1	0	1	0	0	1	4
ENSMUSG00000085704	18.9916	62.6883	29.8642	104.193	1	0	1	0	0	1	4
ENSMUSG00000049588	5.78266	58.0048	12.1958	358.071	1	0	1	0	0	1	4
ENSMUSG00000078664	2.17251	82.4251	16.6227	952.856	1	0	1	0	0	1	4
ENSMUSG00000057816	0.429534	14.1882	5.53435	38.4708	1	0	1	0	0	1	4
ENSMUSG00000018740	76.4528	496.005	103.391	450.471	1	0	1	-1	0	1	4
ENSMUSG00000032815	64.4259	269.997	74.5882	202.267	1	0	1	-1	0	1	4
ENSMUSG00000019039	97.1625	234.439	93.6018	222.743	1	0	1	-1	0	1	4
ENSMUSG00000028159	350.397	767.981	321.449	767.443	1	0	1	-1	0	1	4
ENSMUSG00000039195	279.074	786.873	352.923	819.194	1	0	1	-1	0	1	4
ENSMUSG00000042745	1336.6	3413.82	1098.66	2819.44	1	0	1	-1	0	1	4
ENSMUSG00000056724	165.099	546.047	184.998	479.293	1	0	1	-1	0	1	4
ENSMUSG00000039050	1244.25	3740.97	1061.73	4858.87	1	0	1	-1	0	1	4
ENSMUSG00000000889	0	23.0096	0.400659	2.87999	1	0	0	-1	0	0	4
ENSMUSG00000072944	6.18735	611.702	11.2184	55.1344	1	0	0	-1	0	0	4
ENSMUSG00000090066	9.46733	347.874	15.8963	43.7758	1	0	0	-1	0	0	4
ENSMUSG00000031876	0	7.38148	0	0.436935	1	0	0	-1	0	0	4
ENSMUSG00000022342	10.4827	231.582	6.82433	39.8804	1	0	0	-1	0	0	4
ENSMUSG00000031997	3.18062	62.6708	3.77539	10.9637	1	0	0	-1	0	0	4
ENSMUSG00000047150	8.00485	132.793	10.6812	25.2048	1	0	0	-1	0	0	4
ENSMUSG00000028539	1.36312	52.7524	2.32907	10.7251	1	0	0	-1	0	0	4
ENSMUSG00000074577	15.7365	102.522	12.1078	25.9388	1	0	0	-1	0	0	4
ENSMUSG00000086108	0	10.3581	0	4.50841	1	0	0	-1	0	0	4
ENSMUSG00000006456	284.171	743.092	369.101	393.533	1	0	0	-1	0	0	4
ENSMUSG00000030120	1314.15	3487.23	1700.89	1991.83	1	0	0	-1	0	0	4
ENSMUSG00000016319	22171.9	52778.9	27766.9	30214.4	1	0	0	-1	0	0	4
ENSMUSG00000027404	1647.61	3280.29	1633.84	1968.29	1	0	0	-1	0	0	4
ENSMUSG00000044533	4283.67	8816.65	4028.27	4765.13	1	0	0	-1	0	0	4
ENSMUSG00000017210	607.02	1340.53	535.95	631.411	1	0	0	-1	0	0	4
ENSMUSG00000025137	470.05	1195.61	413.48	629.878	1	0	0	-1	0	0	4
ENSMUSG00000025277	1314.16	3674.65	1223.71	1614.05	1	0	0	-1	0	0	4
ENSMUSG00000063802	306.443	876.89	321.071	364.276	1	0	0	-1	0	0	4
ENSMUSG00000028536	358.016	929.168	349.227	419.333	1	0	0	-1	0	0	4
ENSMUSG00000017288	1401.3	4540.47	1786.15	2090.2	1	0	0	-1	0	0	4
ENSMUSG00000035198	421.722	1416.8	531.171	640.609	1	0	0	-1	0	0	4
ENSMUSG00000031848	164.521	650.531	221.622	276.609	1	0	0	-1	0	0	4
ENSMUSG00000007833	110.868	317.878	123.14	234.165	1	0	0	-1	0	0	4
ENSMUSG00000015133	1024.57	2781.4	1072.13	1880.05	1	0	0	-1	0	0	4
ENSMUSG00000025533	700.056	1973.74	673.803	1232.6	1	0	0	-1	0	0	4
ENSMUSG00000048371	225.854	698.829	227.909	498.296	1	0	0	-1	0	0	4
ENSMUSG00000016253	607.005	1446.58	614.963	945.834	1	0	0	-1	0	0	4
ENSMUSG00000079469	106.555	236.316	98.4294	149.595	1	0	0	-1	0	0	4
ENSMUSG00000031060	321.305	822.352	366.395	516.353	1	0	0	-1	0	0	4
ENSMUSG00000054312	736.751	1928.67	890.483	1245.74	1	0	0	-1	0	0	4
ENSMUSG00000024181	965.524	2982.94	1271.43	1881.49	1	0	0	-1	0	0	4
ENSMUSG00000046691	97.0953	324.069	149.385	195.693	1	0	0	-1	0	0	4
ENSMUSG00000026798	192.777	668.623	217.263	537.739	1	0	0	-1	0	0	4
ENSMUSG00000008601	5757	15989.5	3502.3	6738.09	1	0	0	-1	0	0	4
ENSMUSG00000030510	5824.71	17791.4	4093.78	6434.37	1	0	0	-1	0	0	4
ENSMUSG00000029594	89.6969	279.417	80.9501	102.583	1	0	0	-1	0	0	4
ENSMUSG00000038644	68.4977	206.529	62.4804	80.7564	1	0	0	-1	0	0	4
ENSMUSG00000031349	1975.54	11024.8	2597.45	4784.92	1	0	0	-1	0	0	4
ENSMUSG00000044813	49.7866	219.039	53.2101	74.8771	1	0	0	-1	0	0	4
ENSMUSG00000002580	814.549	2161.8	1130.02	1658.33	1	0	1	0	0	0	4
ENSMUSG00000032126	495.355	1160.74	713.649	898.426	1	0	1	0	0	0	4
ENSMUSG00000013822	690.916	2344.3	1142.26	1631.74	1	0	1	0	0	0	4
ENSMUSG00000032590	252.744	845.813	419.625	667.4	1	0	1	0	0	0	4
ENSMUSG00000048668	114.354	371.666	193.022	305.663	1	0	1	0	0	0	4
ENSMUSG00000039307	628.813	1835.22	991.741	1510.07	1	0	1	0	0	0	4
ENSMUSG00000025227	28.5904	125.441	60.8975	103.635	1	0	1	0	0	0	4
ENSMUSG00000003873	308.484	1190.92	839.754	878.336	1	0	1	0	0	0	4
ENSMUSG00000048578	678.113	2378.65	1494.44	1789.56	1	0	1	0	0	0	4
ENSMUSG00000086130	307.153	949.554	577.662	721.646	1	0	1	0	0	0	4
ENSMUSG00000015944	218.403	1244.59	511.907	777.614	1	0	1	0	0	0	4
ENSMUSG00000040616	294.27	1514.89	604.231	930.594	1	0	1	0	0	0	4
ENSMUSG00000080242	283.283	1183.6	478.024	759.942	1	0	1	0	0	0	4
ENSMUSG00000030088	201.878	1657.83	721.976	937.454	1	0	1	0	0	0	4
ENSMUSG00000020733	1192.74	7888.59	2480.64	5414.08	1	0	1	0	0	0	4
ENSMUSG00000027605	213.373	1728.5	633.849	1320.19	1	0	1	0	0	0	4
ENSMUSG00000023243	36.3396	170.093	61.3468	138.771	1	0	1	0	0	0	4
ENSMUSG00000061286	290.397	1266.08	478.552	1028.92	1	0	1	0	0	0	4
ENSMUSG00000031400	1942.6	9663.42	4132.79	8494.79	1	0	1	0	0	0	4
ENSMUSG00000016344	323.798	1162.32	700.345	1616.97	1	0	1	0	0	0	4
ENSMUSG00000041926	68.5225	320.553	187.311	496.598	1	0	1	0	0	0	4
ENSMUSG00000057176	18.0828	55.0282	47.8321	92.0378	1	0	1	0	0	0	4
ENSMUSG00000022066	112.082	326.917	179.65	379.526	1	0	1	0	0	0	4
ENSMUSG00000051242	7.98001	35.7578	16.5347	37.4192	1	0	1	0	0	0	4
ENSMUSG00000071369	161.993	581.767	337.504	563.416	1	0	1	0	0	0	4
ENSMUSG00000071454	78.0643	214.315	115.821	207.273	1	0	1	0	0	0	4
ENSMUSG00000089832	179.433	473.784	293.276	450.477	1	0	1	0	0	0	4
ENSMUSG00000038167	273.56	1639.14	1043.16	1893.66	1	0	1	0	0	0	4
ENSMUSG00000071042	24.3871	116.192	73.1393	133.71	1	0	1	0	0	0	4
ENSMUSG00000022570	616.98	1855.25	1276	1946.91	1	0	1	0	0	0	4
ENSMUSG00000027327	303.573	767.154	548.606	749.607	1	0	1	0	0	0	4
ENSMUSG00000061518	1348.06	3294.78	2412.67	3175.66	1	0	1	0	0	0	4
ENSMUSG00000028745	2220.86	6351.83	5224.14	6468.54	1	0	1	0	0	0	4
ENSMUSG00000062963	1451.34	3784.42	3272.04	3990.11	1	0	1	0	0	0	4
ENSMUSG00000057933	152.188	540.334	436.868	558.868	1	0	1	0	0	0	4
ENSMUSG00000061758	80.8009	341.398	252.36	354.402	1	0	1	0	0	0	4
ENSMUSG00000037280	932.918	3574.72	3337.68	3575.03	1	0	1	0	0	0	4
ENSMUSG00000039159	1462.47	2870.36	1928.98	2971.2	1	0	1	0	0	0	4
ENSMUSG00000042207	1359.1	2668.7	2366.51	3585.31	1	0	1	0	0	0	4
ENSMUSG00000022303	3.18062	62.3012	60.6637	68.5832	1	0	1	0	0	0	4
ENSMUSG00000046337	3.99	40.1802	34.6038	48.7606	1	0	1	0	0	0	4
ENSMUSG00000043192	0.429534	17.5519	11.5574	16.1674	1	0	1	0	0	0	4
ENSMUSG00000056737	2961.37	18150.2	11262.1	15469.8	1	0	1	0	0	0	4
ENSMUSG00000022226	0	84.469	20.5347	34.5178	1	0	1	0	0	0	4
ENSMUSG00000032717	5.73298	131.28	41.7828	61.1742	1	0	1	0	0	0	4
ENSMUSG00000018387	0.429534	46.7758	8.49528	135.986	1	0	1	0	0	0	4
ENSMUSG00000074065	0	10.1645	3.20527	19.7221	1	0	1	0	0	0	4
ENSMUSG00000030587	206.507	969.078	852.599	2518.31	1	0	1	0	0	0	4
ENSMUSG00000023279	0	25.0068	2.81118	25.9199	1	0	1	0	0	0	4
ENSMUSG00000074637	0	141.192	39.5549	132.479	1	0	1	0	0	0	4
ENSMUSG00000092600	1.76781	32.8896	8.18263	27.9046	1	0	1	0	0	0	4
ENSMUSG00000079554	0	13.4256	2.40395	10.586	1	0	1	0	0	0	4
ENSMUSG00000028339	7.67467	190.707	75.0939	209.007	1	0	1	0	0	0	4
ENSMUSG00000029699	3.1061	24.7398	12.0329	28.0239	1	0	1	0	0	0	4
ENSMUSG00000039179	7.30207	65.1193	25.9745	86.2753	1	0	1	0	0	0	4
ENSMUSG00000092300	0	13.7101	6.49199	18.0542	1	0	1	0	0	0	4
ENSMUSG00000018677	430.185	2398.91	890.783	1187.78	1	0	1	-1	0	0	4
ENSMUSG00000020961	269.907	1591.12	568.484	1290.49	1	0	1	-1	0	0	4
ENSMUSG00000030688	179.969	762.432	270.834	658.516	1	0	1	-1	0	0	4
ENSMUSG00000093077	567.242	4805.11	1560.98	4311.52	1	0	1	-1	0	0	4
ENSMUSG00000034926	274.036	1856.47	608.387	1221.05	1	0	1	-1	0	0	4
ENSMUSG00000033161	952.126	3776.18	1841.44	3023.39	1	0	1	-1	0	0	4
ENSMUSG00000061666	2174.6	6101.35	2284.97	5185.26	1	0	1	-1	0	0	4
ENSMUSG00000035448	0	80.1609	7.14355	13.1286	1	0	1	-1	0	0	4
ENSMUSG00000000295	399.424	1012.51	950.017	572.937	1	1	0	0	0	0	4
ENSMUSG00000030417	718.877	1720.24	1709.17	1017.27	1	1	0	0	0	0	4
ENSMUSG00000078713	970.364	2267.32	2225.32	1218.31	1	1	0	0	0	0	4
ENSMUSG00000025613	6992.75	14689.4	13734.4	8588.37	1	1	0	0	0	0	4
ENSMUSG00000074781	5426.33	12206.2	11273.4	6975.3	1	1	0	0	0	0	4
ENSMUSG00000021036	1299.35	2509.41	2501.73	1622.62	1	1	0	0	0	0	4
ENSMUSG00000038079	294.199	523.665	541.019	331.009	1	1	0	0	0	0	4
ENSMUSG00000020042	360.674	769.981	674.791	522.135	1	1	0	0	0	0	4
ENSMUSG00000024414	527.742	1074.79	954.301	808.83	1	1	0	0	0	0	4
ENSMUSG00000024258	1191.85	2102.04	1947.39	1448.92	1	1	0	0	0	0	4
ENSMUSG00000030663	3246.62	6097.81	5941.33	4552.64	1	1	0	0	0	0	4
ENSMUSG00000031402	1523.36	3025.06	2908.03	2247.57	1	1	0	0	0	0	4
ENSMUSG00000025724	2364.15	5166.45	4966.12	3502.85	1	1	0	0	0	0	4
ENSMUSG00000030615	448.664	1033.44	961.838	724.719	1	1	0	0	0	0	4
ENSMUSG00000036323	3743.64	8107.35	7475.41	5890.17	1	1	0	0	0	0	4
ENSMUSG00000025439	1628.75	3743.69	3123.04	2173.91	1	1	0	0	0	0	4
ENSMUSG00000030869	1584.22	3649.14	2876.06	2201.36	1	1	0	0	0	0	4
ENSMUSG00000066979	2170.62	5679.53	4642.65	3551.76	1	1	0	0	0	0	4
ENSMUSG00000015671	4082.55	8129.76	8862.36	5788.93	1	1	0	0	0	0	4
ENSMUSG00000028643	339.723	680.935	795.822	531.688	1	1	0	0	0	0	4
ENSMUSG00000031843	663.212	1432.78	1731.33	1160.72	1	1	0	0	0	0	4
ENSMUSG00000026281	612.347	1310.8	1447.66	1144.53	1	1	0	0	0	0	4
ENSMUSG00000090553	1846.79	4013.88	4485.55	3313.05	1	1	0	0	0	0	4
ENSMUSG00000029836	219.121	567.186	601.406	464.875	1	1	0	0	0	0	4
ENSMUSG00000051154	1620.68	4397.54	5300.29	4151.9	1	1	0	0	0	0	4
ENSMUSG00000027006	1619.23	2947.44	3015.16	2648.81	1	1	0	0	0	0	4
ENSMUSG00000001424	1366.73	4295.55	2850.75	2726.7	1	1	0	0	0	0	4
ENSMUSG00000029703	90.3894	410.218	236.114	210.809	1	1	0	0	0	0	4
ENSMUSG00000030879	1316.11	5097.31	3148.15	2699.84	1	1	0	0	0	0	4
ENSMUSG00000006589	979.537	4269.27	3690.78	1938.77	1	1	0	0	0	0	4
ENSMUSG00000033706	296.803	1405.02	1183.55	595.233	1	1	0	0	0	0	4
ENSMUSG00000025192	247.744	1267.38	985.811	529.066	1	1	0	0	0	0	4
ENSMUSG00000027959	62.5908	395.524	303.136	160.303	1	1	0	0	0	0	4
ENSMUSG00000030748	986.513	6024.41	4750.7	2678.72	1	1	0	0	0	0	4
ENSMUSG00000026827	1446.39	7029.65	5296.15	2483.94	1	1	0	0	0	0	4
ENSMUSG00000031161	290.769	1546.27	1219.55	579.7	1	1	0	0	0	0	4
ENSMUSG00000020899	279.127	925.321	737.895	468.61	1	1	0	0	0	0	4
ENSMUSG00000056131	247.249	892.636	625.705	463.918	1	1	0	0	0	0	4
ENSMUSG00000032777	601.475	1952.06	1592.21	1222.87	1	1	0	0	0	0	4
ENSMUSG00000026575	88.8348	433.208	309.381	245.311	1	1	0	0	0	0	4
ENSMUSG00000078249	252.798	1391.37	1092.61	836.435	1	1	0	0	0	0	4
ENSMUSG00000037762	30.9616	143.151	103.235	94.8585	1	1	0	0	0	0	4
ENSMUSG00000024854	251.402	880.257	843.846	538.106	1	1	0	0	0	0	4
ENSMUSG00000030929	120.268	430.593	407.663	263.621	1	1	0	0	0	0	4
ENSMUSG00000046841	967.229	3786.11	3586.72	2347.53	1	1	0	0	0	0	4
ENSMUSG00000048440	116.835	491.289	444.75	297.996	1	1	0	0	0	0	4
ENSMUSG00000070871	68.7388	311.365	285.035	172.539	1	1	0	0	0	0	4
ENSMUSG00000026708	188.578	536.49	558.278	364.58	1	1	0	0	0	0	4
ENSMUSG00000054400	75.3236	222.594	220.257	162.128	1	1	0	0	0	0	4
ENSMUSG00000025980	4547.59	13576	12369.2	6763.19	1	1	0	0	0	0	4
ENSMUSG00000039202	1553.06	7284.54	6965.71	3363.05	1	1	0	0	0	0	4
ENSMUSG00000031015	373.259	1294.68	1449.48	775.997	1	1	0	0	0	0	4
ENSMUSG00000073676	1247.86	4155.57	4761.54	2997.43	1	1	0	0	0	0	4
ENSMUSG00000002068	7.37659	199.426	106.251	46.5365	1	1	0	0	0	0	4
ENSMUSG00000027611	56.7222	1161.42	619.397	241.493	1	1	0	0	0	0	4
ENSMUSG00000039519	24.9906	510.454	295.641	103.718	1	1	0	0	0	0	4
ENSMUSG00000025746	0.454374	39.8606	18.6063	5.6604	1	1	0	0	0	0	4
ENSMUSG00000075042	0	28.7576	11.6388	5.18398	1	1	0	0	0	0	4
ENSMUSG00000027530	0	15.1442	8.50841	1.15199	1	1	0	0	0	0	4
ENSMUSG00000027859	2.27187	90.217	48.7963	9.79195	1	1	0	0	0	0	4
ENSMUSG00000045631	0	43.0366	24.6031	1.15199	1	1	0	0	0	0	4
ENSMUSG00000031927	0	25.3204	10.4237	1.15199	1	1	0	0	0	0	4
ENSMUSG00000025059	661.308	8974.57	3732.1	2819.46	1	1	0	0	0	0	4
ENSMUSG00000062991	28.1112	393.605	184.888	106.002	1	1	0	0	0	0	4
ENSMUSG00000074179	4.77455	84.0936	43.3368	23.2579	1	1	0	0	0	0	4
ENSMUSG00000003355	24.3126	312.254	211.254	82.7642	1	1	0	0	0	0	4
ENSMUSG00000029910	177.989	1851.81	1345.2	491.916	1	1	0	0	0	0	4
ENSMUSG00000024579	13.919	101.634	75.0966	30.2481	1	1	0	0	0	0	4
ENSMUSG00000017724	10.3016	265.923	197.171	56.8847	1	1	0	0	0	0	4
ENSMUSG00000024486	185.233	7178.79	5035.71	1445.47	1	1	0	0	0	0	4
ENSMUSG00000035365	31.1852	296.47	203.64	53.6862	1	1	0	0	0	0	4
ENSMUSG00000004098	1.76781	137.664	117.848	40.8958	1	1	0	0	0	0	4
ENSMUSG00000070858	0	18.6047	16.8408	5.6604	1	1	0	0	0	0	4
ENSMUSG00000032446	0	100.426	85.272	24.1919	1	1	0	0	0	0	4
ENSMUSG00000079262	12.7297	339.876	269.29	80.6791	1	1	0	0	0	0	4
ENSMUSG00000010760	19.5453	330.785	290.166	119.052	1	1	0	0	0	0	4
ENSMUSG00000023951	68.7315	599.579	537.437	229.024	1	1	0	0	0	0	4
ENSMUSG00000048012	3.94032	28.2854	27.0464	12.0161	1	1	0	0	0	0	4
ENSMUSG00000038067	3.00674	60.1222	59.9333	28.9982	1	1	0	0	0	0	4
ENSMUSG00000051225	5.83234	179.871	187.37	83.5196	1	1	0	0	0	0	4
ENSMUSG00000092920	3.53563	38.7169	41.503	17.1606	1	1	0	0	0	0	4
ENSMUSG00000024173	96.6077	792.733	736.656	418.975	1	1	0	0	0	0	4
ENSMUSG00000027397	370.013	2737.64	2487.43	1651.15	1	1	0	0	0	0	4
ENSMUSG00000021806	18.3809	230.99	151.643	81.4131	1	1	0	0	0	0	4
ENSMUSG00000047139	2454.02	21737.3	14273.7	7965.8	1	1	0	0	0	0	4
ENSMUSG00000054793	2.62688	62.7968	41.7762	23.6554	1	1	0	0	0	0	4
ENSMUSG00000062515	2542.6	70555.5	51935.4	27697.5	1	1	0	0	0	0	4
ENSMUSG00000037161	34.5221	627.92	370.508	273.443	1	1	0	0	0	0	4
ENSMUSG00000045007	4.41954	39.0247	21.499	18.9873	1	1	0	0	0	0	4
ENSMUSG00000015134	121.316	20977.5	22008.6	3108.2	1	1	0	0	0	0	4
ENSMUSG00000026726	0	8.8214	9.15341	0.873869	1	1	0	0	0	0	4
ENSMUSG00000025128	3.51079	115.315	121.313	26.4959	1	1	0	0	0	0	4
ENSMUSG00000042379	0	69.3131	65.8197	12.0959	1	1	0	0	0	0	4
ENSMUSG00000024207	0	12.8392	10.9124	0.575997	1	1	0	0	0	0	4
ENSMUSG00000073400	0	13.1353	11.4628	1.3108	1	1	0	0	0	0	4
ENSMUSG00000041700	2.27187	338.771	238.806	37.9163	1	1	0	0	0	0	4
ENSMUSG00000063804	0	92.93	68.464	11.6788	1	1	0	0	0	0	4
ENSMUSG00000068748	566.643	9173.39	7065.52	1254.2	1	1	0	0	0	0	4
ENSMUSG00000000753	99.5151	746.564	2609.13	711.793	1	1	0	0	0	0	4
ENSMUSG00000039934	24.2702	208.239	634.411	151.884	1	1	0	0	0	0	4
ENSMUSG00000019846	135.741	474.81	1595.02	308.929	1	1	0	0	0	0	4
ENSMUSG00000019960	1081.11	11101.1	28245.5	6334.55	1	1	0	0	0	0	4
ENSMUSG00000002688	1.81749	27.693	59.2069	18.4912	1	1	0	0	0	0	4
ENSMUSG00000034205	35.5053	293.711	637.183	207.318	1	1	0	0	0	0	4
ENSMUSG00000022367	8.43438	144.09	327.47	114.345	1	1	0	0	0	0	4
ENSMUSG00000036902	8.5089	91.4108	210.708	76.6463	1	1	0	0	0	0	4
ENSMUSG00000016494	468.315	2795.5	6714.47	2076.61	1	1	0	0	0	0	4
ENSMUSG00000036053	87.4468	459.159	1015.76	279.038	1	1	0	0	0	0	4
ENSMUSG00000024397	21.9165	186.904	374.241	175.301	1	1	0	0	0	0	4
ENSMUSG00000025469	0	47.0778	99.7627	42.0478	1	1	0	0	0	0	4
ENSMUSG00000025551	1.36312	29.2356	47.2265	20.1599	1	1	0	0	0	0	4
ENSMUSG00000037613	541.586	4918.16	7790.19	3517.55	1	1	0	0	0	0	4
ENSMUSG00000031628	365.86	1648.79	2844.98	1489.93	1	1	0	0	0	0	4
ENSMUSG00000041324	19.4956	221.588	795.595	373.445	1	1	0	0	0	0	4
ENSMUSG00000004952	67.5847	365.484	533.6	252.085	1	1	0	0	0	0	4
ENSMUSG00000026770	10.4009	74.1843	103.105	56.6065	1	1	0	0	0	0	4
ENSMUSG00000074361	9.89686	127.512	185.765	95.655	1	1	0	0	0	0	4
ENSMUSG00000032135	62.4024	453.81	571.618	348.933	1	1	0	0	0	0	4
ENSMUSG00000032381	1014.56	2812.34	3999.49	2419.89	1	1	0	0	0	0	4
ENSMUSG00000049538	0.454374	30.7606	34.6235	23.6159	1	1	0	0	0	0	4
ENSMUSG00000026196	12.7049	82.1523	82.0089	67.5102	1	1	0	0	0	0	4
ENSMUSG00000027378	62.2285	237.404	215.967	194.206	1	1	0	0	0	0	4
ENSMUSG00000027907	17715	74860.3	70213.4	62799.3	1	1	0	0	0	0	4
ENSMUSG00000041736	1043.14	2979.81	2731.67	2580.05	1	1	0	0	0	0	4
ENSMUSG00000031907	0.908747	19.7543	15.8832	12.2144	1	1	0	0	0	0	4
ENSMUSG00000072620	547.75	3456.54	4297.33	4480.59	1	1	0	0	0	0	4
ENSMUSG00000001985	3.00674	167.475	215.78	46.9734	1	1	0	0	0	0	4
ENSMUSG00000017737	126.739	1283	1503.51	414.241	1	1	0	0	0	0	4
ENSMUSG00000062248	255.827	1337.04	1518.15	406.126	1	1	0	0	0	0	4
ENSMUSG00000039476	0	7.2847	9.55407	3.47573	1	1	0	0	0	0	4
ENSMUSG00000054537	182.373	11028	13294.8	4915.48	1	1	0	0	0	0	4
ENSMUSG00000005087	4505.94	19997.4	25544.7	9399.32	1	1	0	0	0	0	4
ENSMUSG00000031434	80.5101	439.352	620.796	241.381	1	1	0	0	0	0	4
ENSMUSG00000038305	34.3482	164.874	248.747	103.576	1	1	0	0	0	0	4
ENSMUSG00000027603	13.9365	68.0609	97.3482	26.7139	1	1	0	0	0	0	4
ENSMUSG00000023000	0.454374	15.5313	23.652	4.90585	1	1	0	0	0	0	4
ENSMUSG00000027908	0	62.5123	105.962	8.63996	1	1	0	0	0	0	4
ENSMUSG00000028186	0.859067	193.206	326.599	31.6799	1	1	0	0	0	0	4
ENSMUSG00000029380	18.3137	400.351	807.917	97.0852	1	1	0	0	0	0	4
ENSMUSG00000067780	37.7845	766.707	1415.18	186.365	1	1	0	0	0	0	4
ENSMUSG00000030500	0	35.9338	82.9429	6.07759	1	1	0	0	0	0	4
ENSMUSG00000047261	0	82.34	185.548	21.3119	1	1	0	0	0	0	4
ENSMUSG00000028558	0	13.1353	17.5055	1.15199	1	1	0	0	0	0	4
ENSMUSG00000070866	0.429534	16.0093	68.7018	8.52064	1	1	0	0	0	0	4
ENSMUSG00000006642	0	411.01	51.66	49.5127	1	1	0	0	0	0	4
ENSMUSG00000029767	5579.34	12241.5	24012	7392.39	1	1	0	1	0	-1	4
ENSMUSG00000030187	6.16251	56.2512	520.843	27.2899	1	1	0	1	0	-1	4
ENSMUSG00000001870	161.662	1919.27	4250.84	464.316	1	1	0	0	0	-1	4
ENSMUSG00000035799	14.1922	89.6072	226.789	26.5354	1	1	0	0	0	-1	4
ENSMUSG00000027750	473.387	7245.45	20976.9	2976.69	1	1	0	0	0	-1	4
ENSMUSG00000010830	77.5137	265.443	668.078	176.293	1	1	0	0	0	-1	4
ENSMUSG00000032640	53.4391	393.714	1033.72	240.824	1	1	0	0	0	-1	4
ENSMUSG00000035373	72.7961	485.873	1131.27	217.646	1	1	0	0	0	-1	4
ENSMUSG00000004891	9.39281	123.447	546.148	72.5954	1	1	0	0	0	-1	4
ENSMUSG00000028370	26.5172	153.917	600.019	120.342	1	1	0	0	0	-1	4
ENSMUSG00000039329	0	9.10588	53.9825	2.30399	1	1	0	0	0	-1	4
ENSMUSG00000041620	0	13.9946	58.6013	1.72799	1	1	0	0	0	-1	4
ENSMUSG00000071470	3.46111	76.3017	289.295	6.65359	1	1	0	0	0	-1	4
ENSMUSG00000020674	111.411	538.722	887.96	251.987	1	1	0	0	0	-1	4
ENSMUSG00000070436	120.232	459.241	769.168	232.717	1	1	0	0	0	-1	4
ENSMUSG00000037892	61.089	240.266	380.81	80.2611	1	1	0	0	0	-1	4
ENSMUSG00000051855	29.4173	168.604	240.537	34.1616	1	1	0	0	0	-1	4
ENSMUSG00000024776	118.71	336.202	482.64	193.746	1	1	0	0	0	-1	4
ENSMUSG00000002250	37.0993	441.703	145.929	98.8905	1	1	0	0	-1	0	4
ENSMUSG00000011179	352.233	4850.61	1594.31	739.533	1	1	0	0	-1	0	4
ENSMUSG00000022221	93.009	1493.66	577.988	209.54	1	1	0	0	-1	0	4
ENSMUSG00000052551	16.6949	306.787	130.211	29.4746	1	1	0	0	-1	0	4
ENSMUSG00000056018	2.67656	140.145	58.9008	10.9439	1	1	0	0	-1	0	4
ENSMUSG00000027496	64.0036	1511.53	418.126	262.672	1	1	0	0	-1	0	4
ENSMUSG00000094845	7.0961	205.749	46.1349	32.7323	1	1	0	0	-1	0	4
ENSMUSG00000064193	837.958	7401.69	2946.26	2307.61	1	1	0	0	-1	0	4
ENSMUSG00000016756	191.713	4841.96	2806.12	678.876	1	1	0	0	-1	0	4
ENSMUSG00000032572	0	50.0369	26.5446	4.48866	1	1	0	0	-1	0	4
ENSMUSG00000097429	3.51079	166.583	87.4973	18.3513	1	1	0	0	-1	0	4
ENSMUSG00000071561	76.6236	14566	7303.04	484.155	1	1	0	0	-1	0	4
ENSMUSG00000087689	0	25.5932	11.6454	0.575997	1	1	0	0	-1	0	4
ENSMUSG00000027420	7.83097	171.932	83.6864	30.6266	1	1	0	0	-1	0	4
ENSMUSG00000031877	640.779	5426.06	2389.5	1125.95	1	1	0	0	-1	0	4
ENSMUSG00000032254	228.524	2275.71	1052.19	420.015	1	1	0	0	-1	0	4
ENSMUSG00000003099	341.007	1489.3	1061.99	471.072	1	1	0	0	-1	0	4
ENSMUSG00000036672	200.406	911.164	672.044	242.391	1	1	0	0	-1	0	4
ENSMUSG00000003868	463.863	2678.21	1594.53	854.82	1	1	0	0	-1	0	4
ENSMUSG00000011752	711.2	4284.48	2100.02	1387.66	1	1	0	0	-1	0	4
ENSMUSG00000020571	3949.72	16939.6	8594.42	6193.19	1	1	0	0	-1	0	4
ENSMUSG00000030298	2000.96	6972.44	3880.32	2793.68	1	1	0	0	-1	0	4
ENSMUSG00000022451	3946.75	14929.5	12297.7	7069.21	1	1	0	0	-1	0	4
ENSMUSG00000029066	995.883	2969.64	2309.35	1465.3	1	1	0	0	-1	0	4
ENSMUSG00000024587	3092.33	9954.44	6527.36	4552.29	1	1	0	0	-1	0	4
ENSMUSG00000027635	84.1523	283.763	194.853	116.586	1	1	0	0	-1	0	4
ENSMUSG00000073771	101.88	347.721	238.688	121.095	1	1	0	0	-1	0	4
ENSMUSG00000041084	1166.79	5305.34	3751.66	2191.87	1	1	0	0	-1	0	4
ENSMUSG00000026245	1889.94	4707.17	3201.97	2205.04	1	1	0	0	-1	0	4
ENSMUSG00000029447	3601.84	8779.73	5833.83	3968.51	1	1	0	0	-1	0	4
ENSMUSG00000030335	1232.62	3268.33	2123.24	1701.37	1	1	0	0	-1	0	4
ENSMUSG00000055319	1491.53	2782.93	2424.66	1680.87	1	1	0	0	-1	0	4
ENSMUSG00000071662	1143.96	2254.96	2087.89	1354.52	1	1	0	0	-1	0	4
ENSMUSG00000006403	20.8763	203.033	212.613	35.6518	1	1	0	0	-1	0	4
ENSMUSG00000019831	8.02969	49.0867	37.0012	8.40133	1	1	0	0	-1	0	4
ENSMUSG00000038242	0	553.239	50.8902	4.3496	1	1	0	0	-1	0	4
ENSMUSG00000059230	0	199.517	30.4277	16.1279	1	1	0	0	-1	0	4
ENSMUSG00000092500	16.3399	1472.04	296.669	71.185	1	1	0	0	-1	0	4
ENSMUSG00000048455	33.9187	90067.8	25607.7	2334.83	1	1	0	0	-1	0	4
ENSMUSG00000048776	91.1097	14669.3	3700.44	1266.7	1	1	0	0	-1	0	4
ENSMUSG00000079594	2.67656	230.216	61.976	18.4319	1	1	0	0	-1	0	4
ENSMUSG00000085705	0	41.4999	14.9255	2.30399	1	1	0	0	-1	0	4
ENSMUSG00000001020	298.749	1590.89	6829.22	544.047	1	1	0	1	-1	-1	4
ENSMUSG00000051323	22.9992	155.738	768.23	54.0442	1	1	0	1	-1	-1	4
ENSMUSG00000022055	0	14.672	136.167	0	1	1	0	1	-1	-1	4
ENSMUSG00000035131	0.429534	15.241	148.656	0.436935	1	1	0	1	-1	-1	4
ENSMUSG00000043089	0	13.4198	397.78	0	1	1	0	1	-1	-1	4
ENSMUSG00000026479	1549.07	4589.61	12485.3	2018.33	1	1	0	1	-1	-1	4
ENSMUSG00000003955	1086.34	14021	8500.01	2289.84	1	1	0	0	-1	-1	4
ENSMUSG00000042688	2053.75	24452.1	13964	3532.02	1	1	0	0	-1	-1	4
ENSMUSG00000028044	259.88	2479.86	1448.42	459.261	1	1	0	0	-1	-1	4
ENSMUSG00000030528	102.541	607.393	305.922	110.43	1	1	0	0	-1	-1	4
ENSMUSG00000020185	11.0364	444.243	254.632	26.9328	1	1	0	0	-1	-1	4
ENSMUSG00000027048	0.859067	59.4389	33.3558	4.21054	1	1	0	0	-1	-1	4
ENSMUSG00000020256	30.6387	754.901	448.433	45.3441	1	1	0	0	-1	-1	4
ENSMUSG00000039775	0	237.837	136.414	0.575997	1	1	0	0	-1	-1	4
ENSMUSG00000095319	0	44.4766	21.6132	0	1	1	0	0	-1	-1	4
ENSMUSG00000029019	3.94032	241.011	96.5863	6.33597	1	1	0	0	-1	-1	4
ENSMUSG00000064039	0	20.511	7.78197	0	1	1	0	0	-1	-1	4
ENSMUSG00000094733	6.21219	953.357	359.587	11.3809	1	1	0	0	-1	-1	4
ENSMUSG00000035041	9.41765	268.733	85.8067	7.9249	1	1	0	0	-1	-1	4
ENSMUSG00000054966	3.00674	290.555	88.7873	0	1	1	0	0	-1	-1	4
ENSMUSG00000070423	0	31.6257	10.023	0	1	1	0	0	-1	-1	4
ENSMUSG00000040663	29.0696	638.059	231.267	53.4476	1	1	0	0	-1	-1	4
ENSMUSG00000020723	1.74297	55.125	53.7671	2.60186	1	1	0	0	-1	-1	4
ENSMUSG00000024261	0.454374	43.3153	36.4048	0	1	1	0	0	-1	-1	4
ENSMUSG00000027261	0	33.532	29.6067	0	1	1	0	0	-1	-1	4
ENSMUSG00000054679	0.454374	37.6816	33.0366	0	1	1	0	0	-1	-1	4
ENSMUSG00000035385	54.6708	2331.41	1735.24	251.471	1	1	0	0	-1	-1	4
ENSMUSG00000050866	0	60.873	43.1253	0	1	1	0	0	-1	-1	4
ENSMUSG00000037239	0.859067	64.0665	75.4644	3.33667	1	1	0	0	-1	-1	4
ENSMUSG00000085560	0	9.49297	10.4303	0	1	1	0	0	-1	-1	4
ENSMUSG00000086644	0	21.5696	30.0757	1.15199	1	1	0	0	-1	-1	4
ENSMUSG00000043472	10.7632	36191.4	2968.75	29.3956	1	1	0	0	-1	-1	4
ENSMUSG00000050063	518.508	113520	23644.9	1314.54	1	1	0	0	-1	-1	4
ENSMUSG00000071562	0	76.0906	16.942	0.575997	1	1	0	0	-1	-1	4
ENSMUSG00000028683	1009.87	1875.82	1965.26	948.579	1	1	0	0	-1	-1	4
ENSMUSG00000034667	642.403	1211.27	1398.21	602.33	1	1	0	0	-1	-1	4
ENSMUSG00000033565	568.999	1496.42	1506.84	776.383	1	1	0	0	-1	-1	4
ENSMUSG00000039234	453.164	1083.26	1065.32	654.91	1	1	0	0	-1	-1	4
ENSMUSG00000030254	440.307	1485.18	1548.7	381.443	1	1	0	0	-1	-1	4
ENSMUSG00000092215	529.047	2000.59	1897.9	309.101	1	1	0	0	-1	-1	4
ENSMUSG00000032902	648.97	3127.33	2781.58	890.016	1	1	0	0	-1	-1	4
ENSMUSG00000035351	354.983	1781.1	1708.46	545.259	1	1	0	0	-1	-1	4
ENSMUSG00000047910	65.523	432.923	416.343	93.6868	1	1	0	0	-1	-1	4
ENSMUSG00000038679	251.126	2193.21	2542.12	615.352	1	1	0	0	-1	-1	4
ENSMUSG00000058013	597.74	2995.66	3189.1	1242.46	1	1	0	0	-1	-1	4
ENSMUSG00000030512	911.348	4481.97	2695.97	1263.23	1	1	0	0	-1	-1	4
ENSMUSG00000048007	132.956	492.192	339.325	148.801	1	1	0	0	-1	-1	4
ENSMUSG00000075229	293.01	978.827	740.905	314.881	1	1	0	0	-1	-1	4
ENSMUSG00000067367	495.78	1410.07	874.8	451.825	1	1	0	0	-1	-1	4
ENSMUSG00000004791	15.754	252.14	494.771	39.3464	1	1	0	0	-1	-1	4
ENSMUSG00000048126	96.2393	1438.46	2805.07	396.781	1	1	0	0	-1	-1	4
ENSMUSG00000015653	121.756	657.075	1333.59	279.253	1	1	0	0	-1	-1	4
ENSMUSG00000029338	341.663	1456.66	3075.61	410.404	1	1	0	0	-1	-1	4
ENSMUSG00000024538	318.384	1843.02	2948.43	535.665	1	1	0	0	-1	-1	4
ENSMUSG00000068566	1362.01	7799.26	12006.6	2644.24	1	1	0	0	-1	-1	4
ENSMUSG00000036743	0	22.3321	48.4219	0	1	1	0	0	-1	-1	4
ENSMUSG00000096209	0	7.95628	19.1896	0	1	1	0	0	-1	-1	4
ENSMUSG00000014813	58.1174	309.204	1195.16	82.9831	1	1	0	0	-1	-1	4
ENSMUSG00000055555	3.61015	38.057	138.864	4.03198	1	1	0	0	-1	-1	4
ENSMUSG00000027977	0	8.72463	65.377	0	1	1	0	0	-1	-1	4
ENSMUSG00000032291	10.7559	600.783	7933.97	46.0798	1	1	0	0	-1	-1	4
ENSMUSG00000028003	31.4657	567.464	265.923	4.36935	1	1	-1	0	-1	-1	4
ENSMUSG00000056270	9.16925	539.806	327.669	0	1	1	-1	0	-1	-1	4
ENSMUSG00000045475	156.824	67087.3	5752.46	150.792	1	1	0	-1	-1	-1	4
ENSMUSG00000074433	7.40143	37373.8	3412.38	71.3043	1	1	0	-1	-1	-1	4
ENSMUSG00000060201	0	1720.22	124.907	0	1	1	0	-1	-1	-1	4
ENSMUSG00000054905	14.9767	6343.9	829.617	51.9986	1	1	0	-1	-1	-1	4
ENSMUSG00000070719	5.65846	4322.99	152.882	0.575997	1	1	0	-1	-1	-1	4
ENSMUSG00000015652	2.27187	555.596	465.877	81.5925	1	1	1	0	-1	-1	4
ENSMUSG00000030560	1288.24	17884.9	19901.4	5515.09	1	1	1	0	-1	-1	4
ENSMUSG00000074305	335.142	3644.43	4134.97	1825.42	1	1	1	0	-1	-1	4
ENSMUSG00000028364	95.3802	1739.44	2813.89	644.389	1	1	1	0	-1	-1	4
ENSMUSG00000042834	29.467	709.021	1379.88	239.772	1	1	1	0	-1	-1	4
ENSMUSG00000062937	569.567	7068.19	13550.9	2776.87	1	1	1	0	-1	-1	4
ENSMUSG00000052316	25.1541	1408.94	1768.75	227.516	1	1	1	0	-1	-1	4
ENSMUSG00000046352	82.9207	96241.3	20350.1	2189.33	1	1	1	0	-1	-1	4
ENSMUSG00000055811	0	2206.18	761.848	32.1168	1	1	1	0	-1	-1	4
ENSMUSG00000000384	358.173	1243.23	445.921	437.091	1	0	0	0	-1	0	5
ENSMUSG00000003438	476.113	1351.45	519.825	481.659	1	0	0	0	-1	0	5
ENSMUSG00000021177	165.013	411.981	178.461	141.592	1	0	0	0	-1	0	5
ENSMUSG00000032306	315.174	858.433	377.419	303.56	1	0	0	0	-1	0	5
ENSMUSG00000004268	1632.35	5001.09	2528.52	1929.24	1	0	0	0	-1	0	5
ENSMUSG00000032575	2483.28	7882.37	3991.03	2867.78	1	0	0	0	-1	0	5
ENSMUSG00000063049	119.913	361.613	177.732	125.622	1	0	0	0	-1	0	5
ENSMUSG00000006315	1045.73	3236.41	1466.49	1104.73	1	0	0	0	-1	0	5
ENSMUSG00000025130	14981.4	56880.7	26463.6	19806.4	1	0	0	0	-1	0	5
ENSMUSG00000038279	1292.94	5236.53	2285.27	1596.08	1	0	0	0	-1	0	5
ENSMUSG00000041859	546.591	2018.74	849.691	558.394	1	0	0	0	-1	0	5
ENSMUSG00000053801	465.811	1677.85	681.314	461.36	1	0	0	0	-1	0	5
ENSMUSG00000019579	712.932	2321.93	1019.64	938.846	1	0	0	0	-1	0	5
ENSMUSG00000030603	3857.85	12009.9	5619.04	5030.01	1	0	0	0	-1	0	5
ENSMUSG00000020737	1764.58	5547.12	2871.36	2475.14	1	0	0	0	-1	0	5
ENSMUSG00000018848	2228.69	6181.48	3546.31	2095.11	1	0	0	0	-1	0	5
ENSMUSG00000038759	830.039	2351.74	1293.13	837.772	1	0	0	0	-1	0	5
ENSMUSG00000055760	259.685	713.868	387.676	254.802	1	0	0	0	-1	0	5
ENSMUSG00000029430	5158.85	16106.9	8867.51	6057.12	1	0	0	0	-1	0	5
ENSMUSG00000030172	793.498	2341.8	1390.63	918.399	1	0	0	0	-1	0	5
ENSMUSG00000061533	120.467	369.188	220.46	154.501	1	0	0	0	-1	0	5
ENSMUSG00000027405	2391.01	6133.77	3697.2	2432.84	1	0	0	0	-1	0	5
ENSMUSG00000061360	857.36	2125.2	1270.29	916.583	1	0	0	0	-1	0	5
ENSMUSG00000041355	2489.75	6472.82	3387.28	2679.76	1	0	0	0	-1	0	5
ENSMUSG00000041958	776.432	2024.34	1051.54	949.368	1	0	0	0	-1	0	5
ENSMUSG00000042709	434.24	1069.68	547.381	527.417	1	0	0	0	-1	0	5
ENSMUSG00000018882	822.214	2201.44	1230.58	1055.14	1	0	0	0	-1	0	5
ENSMUSG00000030045	615.781	1621.91	944.329	767.222	1	0	0	0	-1	0	5
ENSMUSG00000046432	344.607	868.779	501.673	418.419	1	0	0	0	-1	0	5
ENSMUSG00000022757	2870.31	7090.1	4250.89	3560.66	1	0	0	0	-1	0	5
ENSMUSG00000021131	2372.25	5952.01	3856.67	3012	1	0	0	0	-1	0	5
ENSMUSG00000030079	552.19	1525.39	1039.39	761.043	1	0	0	0	-1	0	5
ENSMUSG00000026019	840.722	1986.85	1380.42	1109.16	1	0	0	0	-1	0	5
ENSMUSG00000003808	1205.84	2739	1308.34	1157.3	1	0	0	0	-1	0	5
ENSMUSG00000063888	2598.24	5831.94	2781.52	2284.29	1	0	0	0	-1	0	5
ENSMUSG00000028318	402.929	920.32	408.156	390.434	1	0	0	0	-1	0	5
ENSMUSG00000004460	1503.78	3326.94	1694.64	1343.94	1	0	0	0	-1	0	5
ENSMUSG00000020526	214.676	467.737	243.112	202.764	1	0	0	0	-1	0	5
ENSMUSG00000020873	1604.36	3675.53	1888.79	1609.5	1	0	0	0	-1	0	5
ENSMUSG00000021468	2498.52	5706.72	2993.11	2504.91	1	0	0	0	-1	0	5
ENSMUSG00000033294	453.671	1028.44	542.266	446.98	1	0	0	0	-1	0	5
ENSMUSG00000040385	5165.53	13225	6011.26	5757.48	1	0	0	0	-1	0	5
ENSMUSG00000024683	577.748	1140.22	691.398	609.745	1	0	0	0	-1	0	5
ENSMUSG00000030286	2766	5939.89	3361.72	2837.54	1	0	0	0	-1	0	5
ENSMUSG00000074088	790.052	1613.42	947.663	777.864	1	0	0	0	-1	0	5
ENSMUSG00000038482	698.659	1552.97	989.645	761.562	1	0	0	0	-1	0	5
ENSMUSG00000003549	495.441	2063.63	1179.38	771.978	1	0	0	0	-1	0	5
ENSMUSG00000020415	380.616	1621.13	933.435	663.318	1	0	0	0	-1	0	5
ENSMUSG00000049553	673.528	2678.57	1389.76	941.153	1	0	0	0	-1	0	5
ENSMUSG00000022111	1042.41	3974.05	2459.3	1366.22	1	0	0	0	-1	0	5
ENSMUSG00000038563	1079.99	3503.1	2267.55	1255.03	1	0	0	0	-1	0	5
ENSMUSG00000063694	2123.17	6488.92	4118.21	2350.65	1	0	0	0	-1	0	5
ENSMUSG00000063884	951.409	3185.14	2040	1220.36	1	0	0	0	-1	0	5
ENSMUSG00000005470	221.367	835.4	451.444	189.243	1	0	0	0	-1	0	5
ENSMUSG00000019849	771.354	2476.17	1384.57	643.727	1	0	0	0	-1	0	5
ENSMUSG00000041438	1334.48	4223.77	2351.48	1147.19	1	0	0	0	-1	0	5
ENSMUSG00000034663	1097.44	3534.74	1916.66	1113.66	1	0	0	0	-1	0	5
ENSMUSG00000021115	805.772	2112.23	1179.75	639.618	1	0	0	0	-1	0	5
ENSMUSG00000028614	426.509	1186.68	610.252	323.045	1	0	0	0	-1	0	5
ENSMUSG00000023036	2013.49	5905.63	2731.34	1300.7	1	0	0	0	-1	0	5
ENSMUSG00000002870	349.06	1428.81	658.762	345.711	1	0	0	0	-1	0	5
ENSMUSG00000005481	1421.22	6757.79	2854.53	1705.54	1	0	0	0	-1	0	5
ENSMUSG00000015112	359.157	1738.14	810.071	477.78	1	0	0	0	-1	0	5
ENSMUSG00000030835	543.137	2521.05	1253.5	621.242	1	0	0	0	-1	0	5
ENSMUSG00000025481	6138.46	24498	9867.98	4914.45	1	0	0	0	-1	0	5
ENSMUSG00000037313	452.228	2254.87	879.623	443.911	1	0	0	0	-1	0	5
ENSMUSG00000038252	154.351	806.903	321.813	151.465	1	0	0	0	-1	0	5
ENSMUSG00000032373	777	6059.36	2825.08	1495.11	1	0	0	0	-1	0	5
ENSMUSG00000063229	21389.7	202909	78101.7	49141.6	1	0	0	0	-1	0	5
ENSMUSG00000003814	9158.48	47671.5	22039	17614.5	1	0	0	0	-1	0	5
ENSMUSG00000028179	62.8961	219.793	96.2146	27.5672	1	0	0	0	-1	0	5
ENSMUSG00000004885	1934.98	19541.7	8148.51	1935.9	1	0	0	0	-1	0	5
ENSMUSG00000034813	74.9903	780.65	340.263	70.8073	1	0	0	0	-1	0	5
ENSMUSG00000023087	11388	105587	49506.1	11525.9	1	0	0	0	-1	0	5
ENSMUSG00000028678	94.3866	1139.69	514.396	136.888	1	0	0	0	-1	0	5
ENSMUSG00000005667	239.532	2012.38	747.021	322.457	1	0	0	0	-1	0	5
ENSMUSG00000024660	73.354	694.756	263.486	102.03	1	0	0	0	-1	0	5
ENSMUSG00000063060	89.1287	918.623	337.335	133.77	1	0	0	0	-1	0	5
ENSMUSG00000072082	117.855	1168.98	423.24	202.967	1	0	0	0	-1	0	5
ENSMUSG00000031561	21.693	219.271	87.8467	42.2247	1	0	0	0	-1	0	5
ENSMUSG00000029516	63.0628	447.513	195.482	82.8415	1	0	0	0	-1	0	5
ENSMUSG00000030659	800.97	6121.11	2586.34	1143.24	1	0	0	0	-1	0	5
ENSMUSG00000037544	93.865	714.739	296.328	121.733	1	0	0	0	-1	0	5
ENSMUSG00000031756	61.6996	558.661	249.225	85.3858	1	0	0	0	-1	0	5
ENSMUSG00000039748	51.0255	511.536	216.414	73.6478	1	0	0	0	-1	0	5
ENSMUSG00000028438	183.87	1003.83	338.608	122.645	1	0	0	0	-1	0	5
ENSMUSG00000068686	12.4741	82.0672	26.8704	12.0161	1	0	0	0	-1	0	5
ENSMUSG00000027469	164.219	1611.37	934.57	289.287	1	0	0	0	-1	0	5
ENSMUSG00000044712	5983.19	31898.7	16069.9	5201.9	1	0	0	0	-1	0	5
ENSMUSG00000001305	460.658	922.414	683.827	444.081	1	0	0	0	-1	0	5
ENSMUSG00000039231	391.996	790.912	593.98	405.095	1	0	0	0	-1	0	5
ENSMUSG00000002477	1329.67	2776.02	2235.06	1480.98	1	0	0	0	-1	0	5
ENSMUSG00000033386	1388.16	2681.6	2185.96	1427.24	1	0	0	0	-1	0	5
ENSMUSG00000034211	1149.67	2154.13	1631.1	1222.49	1	0	0	0	-1	0	5
ENSMUSG00000051391	1638.56	3016.8	2480.56	1780.81	1	0	0	0	-1	0	5
ENSMUSG00000041891	1448.97	3313.09	2729.28	1699.04	1	0	0	0	-1	0	5
ENSMUSG00000005732	2095.34	4819.3	3292.37	2058.43	1	0	0	0	-1	0	5
ENSMUSG00000034192	1027.48	2484.5	1766.27	1090.08	1	0	0	0	-1	0	5
ENSMUSG00000024527	293.884	746.177	534.481	300.026	1	0	0	0	-1	0	5
ENSMUSG00000025869	849.49	2074.11	1548.68	893.165	1	0	0	0	-1	0	5
ENSMUSG00000056962	254.263	682.823	500.496	240.223	1	0	0	0	-1	0	5
ENSMUSG00000091625	759.972	2216.44	1708.45	791.578	1	0	0	0	-1	0	5
ENSMUSG00000020180	1561.89	3013.66	2885.94	1607.18	1	0	0	0	-1	0	5
ENSMUSG00000005410	428.064	3426.01	776.734	389.491	1	0	0	0	-1	0	5
ENSMUSG00000057454	7152.35	70124	15458.8	9492.75	1	0	0	0	-1	0	5
ENSMUSG00000079553	8.2605	79.5628	19.4076	10.5663	1	0	0	0	-1	0	5
ENSMUSG00000086414	6.11283	60.1105	14.0428	7.50771	1	0	0	0	-1	0	5
ENSMUSG00000006398	81.4758	1338.34	284.666	147.534	1	0	0	0	-1	0	5
ENSMUSG00000074476	34.0004	420.747	93.8172	44.2325	1	0	0	0	-1	0	5
ENSMUSG00000039055	15.7613	185.733	46.8679	15.7502	1	0	0	0	-1	0	5
ENSMUSG00000020676	179.542	1438	424.388	162.331	1	0	0	0	-1	0	5
ENSMUSG00000028873	120.141	1453.48	449.845	185.649	1	0	0	0	-1	0	5
ENSMUSG00000046079	2277.59	32660.9	10558.9	3569.25	1	0	0	0	-1	0	5
ENSMUSG00000058360	159.106	3222.7	1047.43	274.888	1	0	0	0	-1	0	5
ENSMUSG00000080950	3.48595	64.1399	18.2871	4.62773	1	0	0	0	-1	0	5
ENSMUSG00000058773	40.5955	844.944	149.856	136.809	1	0	0	0	-1	0	5
ENSMUSG00000091952	13.358	233.744	47.2423	33.328	1	0	0	0	-1	0	5
ENSMUSG00000011632	158.737	11952	1529.72	730.285	1	0	0	0	-1	0	5
ENSMUSG00000038026	0.429534	87.9295	13.0102	7.20984	1	0	0	0	-1	0	5
ENSMUSG00000022468	532.481	26806.2	4760.3	1375.68	1	0	0	0	-1	0	5
ENSMUSG00000047810	12.3002	246.937	45.6528	10.2289	1	0	0	0	-1	0	5
ENSMUSG00000068349	9.14441	203.523	35.8938	3.45598	1	0	0	0	-1	0	5
ENSMUSG00000069272	7.45111	137.245	22.6129	12.6917	1	0	0	0	-1	0	5
ENSMUSG00000029161	19.446	394.887	89.159	19.0277	1	0	0	0	-1	0	5
ENSMUSG00000047884	1087.35	43119.8	9086.26	2656.54	1	0	0	0	-1	0	5
ENSMUSG00000026114	0.429534	89.8533	13.4989	0	1	0	0	0	-1	0	5
ENSMUSG00000063661	0	13.2321	1.76553	0	1	0	0	0	-1	0	5
ENSMUSG00000068008	0	13.1295	1.60264	0	1	0	0	0	-1	0	5
ENSMUSG00000053797	374.553	267139	30851.5	8628.76	1	0	0	0	-1	0	5
ENSMUSG00000057074	0	78.6067	14.4631	0	1	0	0	0	-1	0	5
ENSMUSG00000061762	0	29.344	5.13369	0	1	0	0	0	-1	0	5
ENSMUSG00000058017	0	29.3382	5.69067	0	1	0	0	0	-1	0	5
ENSMUSG00000068885	5.60878	28413.7	5734.65	173.117	1	0	0	0	-1	0	5
ENSMUSG00000045657	4.08936	52.3419	9.07853	0	1	0	0	0	-1	0	5
ENSMUSG00000030693	1259.66	162197	12347.8	5210.23	1	0	0	0	-1	0	5
ENSMUSG00000038641	8.48406	5153.39	372.539	43.1998	1	0	0	0	-1	0	5
ENSMUSG00000042031	1.2886	21469	1451.81	42.9217	1	0	0	0	-1	0	5
ENSMUSG00000044737	0	7690.25	447.463	107.572	1	0	0	0	-1	0	5
ENSMUSG00000084257	0	17.4493	0.964208	0	1	0	0	0	-1	0	5
ENSMUSG00000047441	0.454374	20.4142	0.801318	0.575997	1	0	0	0	-1	0	5
ENSMUSG00000050201	14.9767	406.681	38.9624	14.9759	1	0	0	0	-1	0	5
ENSMUSG00000079434	280.544	1541.6	354.928	39.3653	1	0	0	0	-1	0	5
ENSMUSG00000022902	45.1435	1550.16	498.199	51.1247	1	0	0	0	-1	0	5
ENSMUSG00000033805	0.859067	20.989	7.14355	0.873869	1	0	0	0	-1	0	5
ENSMUSG00000039200	0	18.6898	6.49855	0	1	0	0	0	-1	0	5
ENSMUSG00000078365	0	17.9273	6.57343	0	1	0	0	0	-1	0	5
ENSMUSG00000086494	0	22.4406	11.4076	0	1	0	0	0	-1	0	5
ENSMUSG00000097755	0	10.8303	6.17934	0	1	0	0	0	-1	0	5
ENSMUSG00000021411	95.7528	657.212	634.927	110.373	1	0	0	0	-1	0	5
ENSMUSG00000020435	17.6036	216.212	30.0271	0	1	0	-1	0	-1	-1	5
ENSMUSG00000006599	1287.76	2493.06	2105.12	1057.2	1	0	0	0	-1	-1	5
ENSMUSG00000031422	6385.39	12804.5	11085	5275.35	1	0	0	0	-1	-1	5
ENSMUSG00000030428	73.1904	197.666	178.562	68.2244	1	0	0	0	-1	-1	5
ENSMUSG00000028403	1721.58	5543.84	4174.66	1297.67	1	0	0	0	-1	-1	5
ENSMUSG00000060314	46.6235	150.128	125.436	27.9647	1	0	0	0	-1	-1	5
ENSMUSG00000019977	2571.27	5606.15	3346.1	1445.8	1	0	0	0	-1	-1	5
ENSMUSG00000031403	1560.49	3676.45	2495.22	1112.33	1	0	0	0	-1	-1	5
ENSMUSG00000052512	339.565	787.155	572.572	238.597	1	0	0	0	-1	-1	5
ENSMUSG00000030888	529.424	918.042	637.885	349.382	1	0	0	0	-1	-1	5
ENSMUSG00000018362	1402.9	5905.76	2819.29	1268.2	1	0	0	0	-1	-1	5
ENSMUSG00000027068	1388.45	8108.76	2963.22	505.086	1	0	0	0	-1	-1	5
ENSMUSG00000041064	3.53563	32.3031	13.717	1.15199	1	0	0	0	-1	-1	5
ENSMUSG00000052180	269.005	2880.51	1319.18	50.5487	1	0	0	0	-1	-1	5
ENSMUSG00000068600	2.65172	76.4043	31.0859	2.30399	1	0	0	0	-1	-1	5
ENSMUSG00000028613	33.7624	352.44	104.69	17.7555	1	0	0	0	-1	-1	5
ENSMUSG00000032487	161.983	1034.45	546.288	51.5394	1	0	0	0	-1	-1	5
ENSMUSG00000035095	492.779	2666.52	1527.5	284.004	1	0	0	0	-1	-1	5
ENSMUSG00000036875	36.322	172.751	105.579	20.4973	1	0	0	0	-1	-1	5
ENSMUSG00000035246	61.4046	208.16	121.909	29.4351	1	0	0	0	-1	-1	5
ENSMUSG00000091747	166.899	603.603	317.209	89.4565	1	0	0	0	-1	-1	5
ENSMUSG00000047894	16.0097	195.789	128.383	8.24252	1	0	0	0	-1	-1	5
ENSMUSG00000000628	710.41	6312.19	1810.52	666.854	1	0	0	-1	-1	0	5
ENSMUSG00000021591	4516.51	70564.8	16716.5	9225.36	1	0	0	-1	-1	0	5
ENSMUSG00000003541	1646.35	10896.4	2616.04	1707.24	1	0	0	-1	-1	0	5
ENSMUSG00000024952	821.389	3937.05	849.683	611.336	1	0	0	-1	-1	0	5
ENSMUSG00000046731	2856.39	14631.1	2997.32	1706.07	1	0	0	-1	-1	0	5
ENSMUSG00000025648	235.328	1216.51	246.405	253.632	1	0	0	-1	-1	0	5
ENSMUSG00000042606	98.2876	435.064	118.378	79.3864	1	0	0	-1	-1	0	5
ENSMUSG00000020828	678.357	2716.3	342.036	331.643	1	0	0	-1	-1	0	5
ENSMUSG00000037020	79.8673	406.887	45.5582	33.7246	1	0	0	-1	-1	0	5
ENSMUSG00000047281	15027.9	80559.7	11370.1	8657.98	1	0	0	-1	-1	0	5
ENSMUSG00000038524	160.672	981.43	145.236	132.436	1	0	0	-1	-1	0	5
ENSMUSG00000059900	2237.67	14518.9	1844.63	2168.15	1	0	0	-1	-1	0	5
ENSMUSG00000052273	13.862	88.8914	8.82763	11.8573	1	0	0	-1	-1	0	5
ENSMUSG00000068011	42.3955	273.103	19.1961	40.9156	1	0	0	-1	-1	0	5
ENSMUSG00000005892	0	26.8571	0.882763	0	1	0	0	-1	-1	0	5
ENSMUSG00000021953	2.17251	1761.42	30.8901	15.5519	1	0	0	-1	-1	0	5
ENSMUSG00000092216	0	26.8513	0.482104	0.575997	1	0	0	-1	-1	0	5
ENSMUSG00000033852	156.022	9831.83	356.762	136.189	1	0	0	-1	-1	0	5
ENSMUSG00000050211	187.894	7491.97	395.48	85.9824	1	0	0	-1	-1	0	5
ENSMUSG00000022871	65.6079	4157.25	70.064	131.94	1	0	0	-1	-1	0	5
ENSMUSG00000027401	871.765	35712.3	486.312	935.578	1	0	0	-1	-1	0	5
ENSMUSG00000024215	0	54.0663	0.482104	1.74774	1	0	0	-1	-1	0	5
ENSMUSG00000029236	0	61.4244	1.28342	2.30399	1	0	0	-1	-1	0	5
ENSMUSG00000064232	0.429534	211.617	6.26078	5.75997	1	0	0	-1	-1	0	5
ENSMUSG00000009093	0	9.29943	0	0	1	0	0	-1	-1	0	5
ENSMUSG00000026645	0	8.4343	0	0	1	0	0	-1	-1	0	5
ENSMUSG00000031073	0	20.2206	0	0	1	0	0	-1	-1	0	5
ENSMUSG00000042816	0	18.3144	0	0	1	0	0	-1	-1	0	5
ENSMUSG00000063903	0	7.8595	0	0	1	0	0	-1	-1	0	5
ENSMUSG00000066071	0	23.2031	0	0	1	0	0	-1	-1	0	5
ENSMUSG00000074113	0	17.9214	0	0	1	0	0	-1	-1	0	5
ENSMUSG00000085781	0	8.33753	0	0	1	0	0	-1	-1	0	5
ENSMUSG00000096276	0	7.38148	0	0	1	0	0	-1	-1	0	5
ENSMUSG00000097484	0	22.6108	0	0	1	0	0	-1	-1	0	5
ENSMUSG00000027484	0	2875.98	2.89262	3.05854	1	0	0	-1	-1	0	5
ENSMUSG00000027403	0.454374	289.083	2.56684	0	1	0	0	-1	-1	0	5
ENSMUSG00000049598	0	189.61	2.41052	0.436935	1	0	0	-1	-1	0	5
ENSMUSG00000031074	0.454374	46.6231	0	0	1	0	0	-1	-1	0	5
ENSMUSG00000092494	0.454374	31.916	0	0	1	0	0	-1	-1	0	5
ENSMUSG00000020891	64.9899	1117.47	34.6261	24.4486	1	0	0	-1	-1	0	5
ENSMUSG00000044294	10.9371	234.166	9.55407	4.03198	1	0	0	-1	-1	0	5
ENSMUSG00000021194	0.908747	21.4729	0.482104	0	1	0	0	-1	-1	0	5
ENSMUSG00000006019	59.6016	1151.55	144.806	141.83	1	0	0	-1	-1	0	5
ENSMUSG00000006575	7.52563	97.7186	10.8309	6.8124	1	0	0	-1	-1	0	5
ENSMUSG00000068762	26.7905	246.993	27.2711	19.9402	1	0	0	-1	-1	0	5
ENSMUSG00000029449	73.6127	713.126	86.0129	33.4868	1	0	0	-1	-1	0	5
ENSMUSG00000031372	2156.73	46879.6	4296.49	2155	1	0	0	-1	-1	0	5
ENSMUSG00000064246	333.488	7274.12	764.118	383.464	1	0	0	-1	-1	0	5
ENSMUSG00000060621	32.9851	472.487	40.565	7.22959	1	0	0	-1	-1	0	5
ENSMUSG00000086054	6.49269	84.117	5.54091	2.4628	1	0	0	-1	-1	0	5
ENSMUSG00000032908	76.9848	2834.04	342.589	39.0288	1	0	0	-1	-1	0	5
ENSMUSG00000079025	581.01	16343.4	1510.43	225.016	1	0	0	-1	-1	0	5
ENSMUSG00000081640	15.5056	161.624	8.1892	10.8641	1	0	0	-1	-1	0	5
ENSMUSG00000034206	2.60204	133.219	7.85685	15.7502	1	0	0	-1	-1	0	5
ENSMUSG00000049939	2.22219	71.2369	2.89262	6.05785	1	0	0	-1	-1	0	5
ENSMUSG00000039648	558.628	7887.21	540.536	1265.39	1	0	0	-1	-1	0	5
ENSMUSG00000001056	2233.8	5653.01	2085	2208.07	1	0	0	-1	-1	0	5
ENSMUSG00000022551	1323.18	3195.14	1177.25	1248.44	1	0	0	-1	-1	0	5
ENSMUSG00000029034	707.544	1701.61	667.107	668.639	1	0	0	-1	-1	0	5
ENSMUSG00000041346	172.178	451.194	175.943	180.142	1	0	0	-1	-1	0	5
ENSMUSG00000060862	94.0916	254.909	97.2865	102.326	1	0	0	-1	-1	0	5
ENSMUSG00000024158	987.48	2764.02	919.013	1027.32	1	0	0	-1	-1	0	5
ENSMUSG00000032115	679.927	1876.64	656.087	737.069	1	0	0	-1	-1	0	5
ENSMUSG00000038685	177.782	515.041	191.439	199.209	1	0	0	-1	-1	0	5
ENSMUSG00000031967	566.262	1720.67	668.999	771.35	1	0	0	-1	-1	0	5
ENSMUSG00000064068	478.023	1411.75	555.857	603.03	1	0	0	-1	-1	0	5
ENSMUSG00000037364	338.583	1212.27	439.175	517.883	1	0	0	-1	-1	0	5
ENSMUSG00000073838	607.601	2015.89	710.198	824.444	1	0	0	-1	-1	0	5
ENSMUSG00000004264	1434.79	3980.57	1766.37	1618.6	1	0	0	-1	-1	0	5
ENSMUSG00000024026	2981.48	7034.27	3185.3	2738.01	1	0	0	-1	-1	0	5
ENSMUSG00000001380	2624.9	6207.73	2511.2	1657.47	1	0	0	-1	-1	0	5
ENSMUSG00000021670	4065.89	10565.6	4179.36	3117.48	1	0	0	-1	-1	0	5
ENSMUSG00000030056	827.777	2208.87	902.911	737.593	1	0	0	-1	-1	0	5
ENSMUSG00000024966	2337.7	6996.15	2667.15	2204.05	1	0	0	-1	-1	0	5
ENSMUSG00000030082	5830.31	17952.1	6620.95	5887.15	1	0	0	-1	-1	0	5
ENSMUSG00000051000	923.205	2962.86	1059.83	918.119	1	0	0	-1	-1	0	5
ENSMUSG00000028741	573.129	1771.61	717.343	626.862	1	0	0	-1	-1	0	5
ENSMUSG00000027695	475.098	1441.43	556.946	395.085	1	0	0	-1	-1	0	5
ENSMUSG00000042462	425.876	1344.87	542.723	374.449	1	0	0	-1	-1	0	5
ENSMUSG00000078812	17239.6	56196.8	19114.9	14871.6	1	0	0	-1	-1	0	5
ENSMUSG00000010048	372.667	1482.2	438.816	415.616	1	0	0	-1	-1	0	5
ENSMUSG00000075391	150.953	651.54	217.32	183.4	1	0	0	-1	-1	0	5
ENSMUSG00000024774	999.525	3769.22	1258.08	1191.13	1	0	0	-1	-1	0	5
ENSMUSG00000031371	570.588	2094.55	645.962	691.234	1	0	0	-1	-1	0	5
ENSMUSG00000039616	346.971	1190	367.417	387.734	1	0	0	-1	-1	0	5
ENSMUSG00000027613	2408.5	8820.33	2415.98	2861.04	1	0	0	-1	-1	0	5
ENSMUSG00000031168	1834.09	7395.37	1838.74	2493.91	1	0	0	-1	-1	0	5
ENSMUSG00000028066	179.391	653.176	245.58	238.495	1	0	0	-1	-1	0	5
ENSMUSG00000031388	384.396	1244.7	389.142	449.402	1	0	0	-1	-1	0	5
ENSMUSG00000001420	437.445	1303.9	239.273	429.635	1	0	0	-1	-1	0	5
ENSMUSG00000033105	1464.06	4819.49	914.827	1576.06	1	0	0	-1	-1	0	5
ENSMUSG00000029482	1766.81	4807.41	1075.2	1689.67	1	0	0	-1	-1	0	5
ENSMUSG00000027412	799.182	2655.34	642.333	1017.27	1	0	0	-1	-1	0	5
ENSMUSG00000036856	392.63	1157.91	246.941	455.596	1	0	0	-1	-1	0	5
ENSMUSG00000006517	422.864	1867.03	349.395	632.621	1	0	0	-1	-1	0	5
ENSMUSG00000037151	164.74	732.892	114.365	222.206	1	0	0	-1	-1	0	5
ENSMUSG00000003123	244.231	860.946	188.286	186.817	1	0	0	-1	-1	0	5
ENSMUSG00000028680	417.134	1568.25	307.426	288.192	1	0	0	-1	-1	0	5
ENSMUSG00000028048	3587.92	12053.5	3051.56	2355	1	0	0	-1	-1	0	5
ENSMUSG00000050854	632.338	1898.53	405.779	315.751	1	0	0	-1	-1	0	5
ENSMUSG00000023832	1828.02	5747.53	1213.6	1524.37	1	0	0	-1	-1	0	5
ENSMUSG00000011034	1760.25	4656.77	1324.16	1139.04	1	0	0	-1	-1	0	5
ENSMUSG00000021385	622.431	1667.14	485.056	349.301	1	0	0	-1	-1	0	5
ENSMUSG00000022351	6928.6	15199	5070.25	4101.9	1	0	0	-1	-1	0	5
ENSMUSG00000024830	626.863	1663.76	265.285	245.885	1	0	0	-1	-1	0	5
ENSMUSG00000028655	105.313	316.142	37.7565	53.9224	1	0	0	-1	-1	0	5
ENSMUSG00000022070	129.115	471.772	188.273	88.2641	1	0	0	-1	-1	0	5
ENSMUSG00000029446	626.353	2911.5	1240.58	759.92	1	0	0	-1	-1	0	5
ENSMUSG00000041037	191.85	893.533	335.736	223.936	1	0	0	-1	-1	0	5
ENSMUSG00000030493	250.707	966.43	416.946	302.073	1	0	0	-1	-1	0	5
ENSMUSG00000037894	1701.7	7107.49	3163.86	2516.03	1	0	0	-1	-1	0	5
ENSMUSG00000029752	1685.76	10862.8	3861.12	2329.27	1	0	0	-1	-1	0	5
ENSMUSG00000037278	610.126	3368.64	1060.1	759.803	1	0	0	-1	-1	0	5
ENSMUSG00000019139	169.273	1085.03	316.197	420.182	1	0	0	-1	-1	0	5
ENSMUSG00000027597	224.782	1458.14	434.804	483.449	1	0	0	-1	-1	0	5
ENSMUSG00000028671	215.447	1262.61	364.99	413.475	1	0	0	-1	-1	0	5
ENSMUSG00000048087	118.908	646.623	214.886	222.012	1	0	0	-1	-1	0	5
ENSMUSG00000070284	357.375	1845.26	563.267	590.641	1	0	0	-1	-1	0	5
ENSMUSG00000064254	431.601	1888.54	614.554	648.415	1	0	0	-1	-1	0	5
ENSMUSG00000024925	82.8886	461.343	106.489	132.872	1	0	0	-1	-1	0	5
ENSMUSG00000046598	144.325	789.128	200.377	253.47	1	0	0	-1	-1	0	5
ENSMUSG00000059316	618.274	2618.25	590.532	730.484	1	0	0	-1	-1	0	5
ENSMUSG00000005378	421.063	894.927	415.383	465.034	1	0	0	-1	-1	0	5
ENSMUSG00000023051	318.604	764.262	327.156	353.096	1	0	0	-1	-1	0	5
ENSMUSG00000029363	441.826	1096.89	503.365	510.116	1	0	0	-1	-1	0	5
ENSMUSG00000038145	1076.63	2445.66	981.509	1111.64	1	0	0	-1	-1	0	5
ENSMUSG00000049751	2143.86	3917.58	1806.92	2013.41	1	0	0	-1	-1	0	5
ENSMUSG00000029073	1628.41	3008.29	1157.05	1218.45	1	0	0	-1	-1	0	5
ENSMUSG00000032193	2362.08	4815.2	1539.11	1797.96	1	0	0	-1	-1	0	5
ENSMUSG00000029145	875.528	1836.62	449.124	629.524	1	0	0	-1	-1	0	5
ENSMUSG00000008373	783.106	2770.23	1393.77	1159.54	1	0	0	-1	-1	0	5
ENSMUSG00000029063	2235	6497.64	3248.76	3113.34	1	0	0	-1	-1	0	5
ENSMUSG00000030062	3206.73	8307.32	4250.6	4161.24	1	0	0	-1	-1	0	5
ENSMUSG00000057130	591.756	1501.77	845.565	724.023	1	0	0	-1	-1	0	5
ENSMUSG00000021276	591.838	1198.83	658.339	451.907	1	0	0	-1	-1	0	5
ENSMUSG00000028729	1357.87	2869.57	1536.88	1162.32	1	0	0	-1	-1	0	5
ENSMUSG00000052962	1243.69	2557.67	1486.19	1113.37	1	0	0	-1	-1	0	5
ENSMUSG00000028330	1144.24	2435.36	1453.37	890.367	1	0	0	-1	-1	0	5
ENSMUSG00000024844	1754.47	4595.41	2513.89	1820.85	1	0	0	-1	-1	0	5
ENSMUSG00000057278	2666	6845.06	3927.18	2804.38	1	0	0	-1	-1	0	5
ENSMUSG00000061950	785.209	2060.96	1069.3	693.798	1	0	0	-1	-1	0	5
ENSMUSG00000062098	4197.52	9384.44	4122.38	2102.87	1	0	0	-1	-1	0	5
ENSMUSG00000024799	99.1291	439.243	62.3569	173.926	1	0	0	-1	-1	1	5
ENSMUSG00000059743	8852.69	22791.1	2535.76	5784.95	1	-1	0	-1	-1	1	5
ENSMUSG00000020840	8915.79	62376.2	12101	4027.04	1	0	0	-1	-1	-1	5
ENSMUSG00000024084	297.933	4633.52	612.899	112.735	1	0	0	-1	-1	-1	5
ENSMUSG00000042529	15.6547	1313.67	44.1578	1.72799	1	0	0	-1	-1	-1	5
ENSMUSG00000042845	3.03158	1667.49	9.37804	0	1	0	0	-1	-1	-1	5
ENSMUSG00000029999	2642.61	8548.85	4207.52	2187.55	1	0	0	-1	-1	-1	5
ENSMUSG00000014550	1021.28	2143.24	794.349	526.184	1	0	-1	-1	-1	0	5
ENSMUSG00000027579	96.5125	410.673	46.1546	13.4462	1	0	-1	-1	-1	0	5
ENSMUSG00000069808	11898.9	52196.3	4393.04	1720.48	1	0	-1	-1	-1	0	5
ENSMUSG00000037049	1649.76	9223.16	762.513	447.813	1	0	-1	-1	-1	0	5
ENSMUSG00000058672	1264.85	6199.5	901.784	515.08	1	0	-1	-1	-1	0	5
ENSMUSG00000053398	1042.34	3512.21	854.164	499.454	1	0	-1	-1	-1	0	5
ENSMUSG00000058260	14.7211	659.497	4.5767	0.575997	1	0	-1	-1	-1	0	5
ENSMUSG00000014551	450.899	2412.1	1050	767.141	1	1	0	-1	-1	0	5
ENSMUSG00000024007	410.808	1491.89	681.531	600.129	1	1	0	-1	-1	0	5
ENSMUSG00000037601	1172.4	4966.22	2718.99	1858.54	1	1	0	-1	-1	0	5
ENSMUSG00000071653	718.098	1962.6	1130.75	962.541	1	1	0	-1	-1	0	5
ENSMUSG00000023345	51.5968	606.486	145.454	71.3027	1	1	0	-1	-1	0	5
ENSMUSG00000027533	2715.81	224956	51983.5	16076.6	1	1	0	-1	-1	0	5
ENSMUSG00000074183	643.893	23558.9	4679.74	2370.59	1	1	0	-1	-1	0	5
ENSMUSG00000025196	2.24703	575.503	45.9982	20.0208	1	1	0	-1	-1	0	5
ENSMUSG00000046637	0	292.308	14.1308	6.09734	1	1	0	-1	-1	0	5
ENSMUSG00000005355	3813.9	46046.5	1932.15	73.8264	1	0	-1	-1	-1	-1	5
ENSMUSG00000039452	61.4264	620.941	27.6231	0	1	0	-1	-1	-1	-1	5
ENSMUSG00000059956	2122.1	21360.2	635.29	20.7359	1	0	-1	-1	-1	-1	5
ENSMUSG00000037469	729.116	6226.25	304.543	0.575997	1	0	-1	-1	-1	-1	5
ENSMUSG00000009356	14.9198	206.755	14.1176	0	1	0	-1	-1	-1	-1	5
ENSMUSG00000053675	378.003	1278.12	104.098	28.9982	1	0	-1	-1	-1	-1	5
ENSMUSG00000024640	2897.45	9460.55	3149.73	1182.53	1	0	-1	-1	-1	-1	5
ENSMUSG00000045136	365.064	1165.75	356.744	102.902	1	0	-1	-1	-1	-1	5
ENSMUSG00000048787	945.891	2584.33	962.397	354.862	1	0	-1	-1	-1	-1	5
ENSMUSG00000000056	1839.99	1144.44	750.478	894.638	0	-1	-1	0	0	0	6
ENSMUSG00000029190	1647.12	1012.15	681.833	706.742	0	-1	-1	0	0	0	6
ENSMUSG00000021518	2417.07	1473.91	1123.48	1186.43	0	-1	-1	0	0	0	6
ENSMUSG00000015750	698.176	380.663	257.476	319.667	0	-1	-1	0	0	0	6
ENSMUSG00000024981	7852.59	4342.34	2845.88	4017.19	0	-1	-1	0	0	0	6
ENSMUSG00000001441	3884.25	2075.71	1659.56	1259.05	0	-1	-1	0	0	0	6
ENSMUSG00000034617	839.683	475.45	379.036	263.061	0	-1	-1	0	0	0	6
ENSMUSG00000078202	1335.18	659.323	561.344	314.88	0	-1	-1	0	0	0	6
ENSMUSG00000015214	1285.07	659.365	438.159	354.388	0	-1	-1	0	0	0	6
ENSMUSG00000020919	449.234	194.367	151.679	178.572	0	-1	-1	0	0	0	6
ENSMUSG00000071646	3079.68	1375.28	1055.69	1189.26	0	-1	-1	0	0	0	6
ENSMUSG00000027954	3350.56	1587.55	1066.18	1181.42	0	-1	-1	0	0	0	6
ENSMUSG00000021027	1097.94	540.596	455.76	428.727	0	-1	-1	0	0	0	6
ENSMUSG00000032870	1067.45	510.996	428.868	410.856	0	-1	-1	0	0	0	6
ENSMUSG00000021189	3360.57	1492.65	1416.71	1215.89	0	-1	-1	0	0	0	6
ENSMUSG00000062210	7285.08	3059.4	2968.88	2495.17	0	-1	-1	0	0	0	6
ENSMUSG00000047030	564.604	288.385	239.808	248.188	0	-1	-1	0	0	0	6
ENSMUSG00000023088	4963.06	2628.39	1300.07	1864.57	0	-1	-1	0	0	0	6
ENSMUSG00000024594	2397.31	1310.78	739.098	984.145	0	-1	-1	0	0	0	6
ENSMUSG00000046962	737.24	422.715	254.751	267.39	0	-1	-1	0	0	0	6
ENSMUSG00000028042	382.612	249.788	113.775	166.2	0	-1	-1	0	0	0	6
ENSMUSG00000001105	4738.85	2240.86	1234.24	1198.67	0	-1	-1	0	0	0	6
ENSMUSG00000030207	1155.37	591.116	256.486	293.02	0	-1	-1	0	0	0	6
ENSMUSG00000032598	450.996	216.711	86.097	109.991	0	-1	-1	0	0	0	6
ENSMUSG00000033365	1024.38	532.102	171.93	244.156	0	-1	-1	0	0	0	6
ENSMUSG00000020806	1102.59	486.567	256.013	327.139	0	-1	-1	0	0	0	6
ENSMUSG00000092417	503.901	203.575	115.235	137.223	0	-1	-1	0	0	0	6
ENSMUSG00000074259	377.922	162.58	84.3866	91.5811	0	-1	-1	0	0	0	6
ENSMUSG00000026270	382.571	151.785	72.8161	94.201	0	-1	-1	0	0	0	6
ENSMUSG00000075590	272.46	104.912	49.7671	58.0144	0	-1	-1	0	0	0	6
ENSMUSG00000021930	3036.15	1006.65	861.64	731.087	0	-1	-1	0	0	0	6
ENSMUSG00000033542	8425.21	3087.74	2200.73	2346.84	0	-1	-1	0	0	0	6
ENSMUSG00000022883	1735.7	692.721	578.242	360.563	0	-1	-1	0	0	0	6
ENSMUSG00000019254	644.399	239.805	86.9377	115.95	0	-1	-1	0	0	0	6
ENSMUSG00000024901	143.647	55.0516	23.6651	23.9327	0	-1	-1	0	0	0	6
ENSMUSG00000071856	1931.91	798.396	280.933	322.098	0	-1	-1	0	0	0	6
ENSMUSG00000030643	471.176	214.94	71.6378	82.2672	0	-1	-1	0	0	0	6
ENSMUSG00000034957	1037.42	508.576	190.485	134.84	0	-1	-1	0	0	0	6
ENSMUSG00000020134	2815.12	956.745	477.169	661.473	0	-1	-1	0	0	0	6
ENSMUSG00000021250	4234.68	1484.77	739.611	885.33	0	-1	-1	0	0	0	6
ENSMUSG00000068036	9900.76	3281.95	1612.81	2092.78	0	-1	-1	0	0	0	6
ENSMUSG00000041842	2170.42	637.815	324.298	439.48	0	-1	-1	0	0	0	6
ENSMUSG00000057719	2641.41	801.032	297.854	565.043	0	-1	-1	0	0	0	6
ENSMUSG00000028040	467.818	150.248	95.6116	50.6672	0	-1	-1	0	0	0	6
ENSMUSG00000031671	319.587	112.886	69.888	42.6419	0	-1	-1	0	0	0	6
ENSMUSG00000032060	2307.93	733.258	330.566	322.688	0	-1	-1	0	0	0	6
ENSMUSG00000097296	105.167	25.7926	23.4208	15.1742	0	-1	-1	0	0	0	6
ENSMUSG00000032011	210.31	67.5887	63.5037	25.7405	0	-1	-1	0	0	0	6
ENSMUSG00000002320	881.415	766.295	415.067	454.982	0	-1	-1	0	0	0	6
ENSMUSG00000026933	814.713	669.849	426.185	435.76	0	-1	-1	0	0	0	6
ENSMUSG00000028960	1029.96	847.998	529.986	542.806	0	-1	-1	0	0	0	6
ENSMUSG00000025871	6292.76	4634.34	3083.57	2892.6	0	-1	-1	0	0	0	6
ENSMUSG00000018209	3049.97	2245.63	1640.31	1661.53	0	-1	-1	0	0	0	6
ENSMUSG00000060636	3028.22	2301.48	1665.57	1745.44	0	-1	-1	0	0	0	6
ENSMUSG00000015357	2229.27	1457.77	1251.63	969.983	0	-1	-1	0	0	0	6
ENSMUSG00000052812	379.413	222.292	199.824	197.323	0	-1	-1	0	0	0	6
ENSMUSG00000028010	150.783	114.394	56.6203	55.313	0	-1	-1	0	0	0	6
ENSMUSG00000030986	3567.3	2401.07	1375.58	1346.98	0	-1	-1	0	0	0	6
ENSMUSG00000032396	583.591	407.826	267.812	214.7	0	-1	-1	0	0	0	6
ENSMUSG00000033039	563.359	350.129	245.241	201.949	0	-1	-1	0	0	0	6
ENSMUSG00000028527	1083.49	655.617	338.336	263.715	0	-1	-1	0	0	0	6
ENSMUSG00000039768	2591.92	1673.07	765.034	791.551	0	-1	-1	0	0	0	6
ENSMUSG00000032584	619.596	480.271	181.793	154.342	0	-1	-1	0	0	0	6
ENSMUSG00000003555	83.0231	9.58391	2.40395	0	0	-1	-1	0	0	0	6
ENSMUSG00000028039	815.564	107.974	36.7174	11.5199	0	-1	-1	0	0	0	6
ENSMUSG00000081169	509.461	79.4368	6.8112	11.9363	0	-1	-1	0	0	0	6
ENSMUSG00000057215	29.0199	3.8359	2.24763	1.15199	0	-1	-1	0	0	0	6
ENSMUSG00000059327	135.32	19.464	6.89264	6.99096	0	-1	-1	0	0	0	6
ENSMUSG00000067049	296.972	47.5441	16.6976	8.06396	0	-1	-1	0	0	0	6
ENSMUSG00000020646	11935.4	1487.56	351.814	741.579	0	-1	-1	0	0	0	6
ENSMUSG00000031209	957.647	101.519	21.4503	62.6808	0	-1	-1	0	0	0	6
ENSMUSG00000039628	34.1991	3.16432	0	3.05854	0	-1	-1	0	0	0	6
ENSMUSG00000020882	95.6565	6.90345	6.50512	4.07148	0	-1	-1	0	0	0	6
ENSMUSG00000017211	14.1177	2.874	0	0	0	-1	-1	0	0	0	6
ENSMUSG00000053765	3953.75	770.876	13.6224	19.6621	0	-1	-1	0	0	0	6
ENSMUSG00000073656	33.3225	6.03833	0	0	0	-1	-1	0	0	0	6
ENSMUSG00000050505	68.5225	13.7952	0	1.72799	0	-1	-1	0	0	0	6
ENSMUSG00000030302	43.0061	9.77161	0.482104	0.436935	0	-1	-1	0	0	0	6
ENSMUSG00000042940	18.6863	4.9855	0	0	0	-1	-1	0	0	0	6
ENSMUSG00000014104	9.06989	0	0	0	0	-1	-1	0	0	0	6
ENSMUSG00000022441	8.21082	0	0	0	0	-1	-1	0	0	0	6
ENSMUSG00000025013	10.905	0	0	0	0	-1	-1	0	0	0	6
ENSMUSG00000035963	9.03779	0	0	0	0	-1	-1	0	0	0	6
ENSMUSG00000083168	9.51701	0	0	0	0	-1	-1	0	0	0	6
ENSMUSG00000089809	8.23566	0	0	0	0	-1	-1	0	0	0	6
ENSMUSG00000028589	10.5324	0.574801	0	0	0	-1	-1	0	0	0	6
ENSMUSG00000097624	14.0359	0.574801	0	0	0	-1	-1	0	0	0	6
ENSMUSG00000036123	91.5113	6.32281	0	0	0	-1	-1	0	0	0	6
ENSMUSG00000091176	9.24377	0.671574	0	0	0	-1	-1	0	0	0	6
ENSMUSG00000066704	1808.81	142.052	14.8244	0	0	-1	-1	0	0	0	6
ENSMUSG00000039481	15.5056	1.24638	0	0.436935	0	-1	-1	0	0	0	6
ENSMUSG00000038224	24.8239	2.49275	0	0	0	-1	-1	0	0	0	6
ENSMUSG00000055095	42.087	4.02945	0	0	0	-1	-1	0	0	0	6
ENSMUSG00000096879	14.3661	1.34315	0	0	0	-1	-1	0	0	0	6
ENSMUSG00000043811	30.3582	2.6863	0	0	0	-1	-1	0	0	0	6
ENSMUSG00000067597	115.213	13.2204	0	0	0	-1	-1	0	0	0	6
ENSMUSG00000081225	76.193	8.62201	0	0	0	-1	-1	0	0	0	6
ENSMUSG00000083172	14.8277	1.82118	0	0	0	-1	-1	0	0	0	6
ENSMUSG00000005947	492.72	140.066	42.3989	52.2767	0	-1	-1	0	0	0	6
ENSMUSG00000027932	185.72	51.2891	19.564	11.1028	0	-1	-1	0	0	0	6
ENSMUSG00000029168	50.8298	16.7777	5.05881	1.74774	0	-1	-1	0	0	0	6
ENSMUSG00000034607	56237	19091.8	5308.11	5079.18	0	-1	-1	0	0	0	6
ENSMUSG00000030771	294.362	119.931	27.6231	19.3444	0	-1	-1	0	0	0	6
ENSMUSG00000046623	8008.47	3783.55	724.587	858.433	0	-1	-1	0	0	0	6
ENSMUSG00000023328	24.9305	6.23188	2.9675	0.436935	0	-1	-1	0	0	0	6
ENSMUSG00000048939	251.583	83.1993	8.58986	24.7679	0	-1	-1	0	0	0	6
ENSMUSG00000096351	88.4653	29.6344	4.73303	6.7729	0	-1	-1	0	0	0	6
ENSMUSG00000006777	25998.2	4913.8	1901.97	4026.07	0	-1	-1	0	0	0	6
ENSMUSG00000037736	870.078	185.358	51.4091	102.843	0	-1	-1	0	0	0	6
ENSMUSG00000086968	408.343	76.1874	33.1864	47.0721	0	-1	-1	0	0	0	6
ENSMUSG00000015970	591.039	123.79	35.9752	49.5753	0	-1	-1	0	0	0	6
ENSMUSG00000021950	115547	24941.3	8179.57	8168.32	0	-1	-1	0	0	0	6
ENSMUSG00000070803	76.3286	18.2118	3.36816	6.79265	0	-1	-1	0	0	0	6
ENSMUSG00000018012	79.4626	15.5371	8.90251	6.2364	0	-1	-1	0	0	0	6
ENSMUSG00000042734	299.358	69.2956	31.2974	21.7875	0	-1	-1	0	0	0	6
ENSMUSG00000040680	63.6237	16.3964	9.78527	4.90585	0	-1	-1	0	0	0	6
ENSMUSG00000048251	2455.7	708.481	355.731	257.984	0	-1	-1	0	0	0	6
ENSMUSG00000024391	9.72298	3.54558	0	0	0	-1	-1	0	0	0	6
ENSMUSG00000031257	10.5572	3.64235	0	0	0	-1	-1	0	0	0	6
ENSMUSG00000087505	7.45111	3.06755	0	0	0	-1	-1	0	0	0	6
ENSMUSG00000022229	302.929	84.167	64.041	5.38228	0	-1	-1	0	-1	-1	6
ENSMUSG00000071019	9459.12	2731.44	1012.46	102.384	0	-1	-1	0	-1	-1	6
ENSMUSG00000090121	1082.55	453.587	104.74	6.91197	0	-1	-1	0	-1	-1	6
ENSMUSG00000051065	1460.17	1004.52	498.27	211.125	0	-1	-1	0	-1	-1	6
ENSMUSG00000055116	806.901	337.114	274.425	106.536	0	-1	-1	0	-1	-1	6
ENSMUSG00000002249	203.022	166.577	50.0403	87.647	0	-1	-1	-1	0	0	6
ENSMUSG00000028453	314.87	256.906	64.1159	134.341	0	-1	-1	-1	0	0	6
ENSMUSG00000044628	183.612	139.538	8.50185	51.936	0	-1	-1	-1	0	0	6
ENSMUSG00000048399	3099.8	2633.55	522.745	767.779	0	-1	-1	-1	0	0	6
ENSMUSG00000008435	1866.67	1018.51	434.928	638.555	0	-1	-1	-1	0	0	6
ENSMUSG00000018398	2147.27	1210.19	552.812	805.791	0	-1	-1	-1	0	0	6
ENSMUSG00000028974	2123.8	1211.11	407.5	729.657	0	-1	-1	-1	0	0	6
ENSMUSG00000013483	1006.66	384.977	108.882	206.395	0	-1	-1	-1	0	0	6
ENSMUSG00000020656	7858.69	3209.31	940.162	1366.45	0	-1	-1	-1	0	0	6
ENSMUSG00000013766	2789.08	1457.19	377.744	578.871	0	-1	-1	-1	0	0	6
ENSMUSG00000043782	895.938	457.542	117.69	179.704	0	-1	-1	-1	0	0	6
ENSMUSG00000032066	76.843	45.2449	7.78854	15.6507	0	-1	-1	-1	0	0	6
ENSMUSG00000021814	6426.36	5400.03	3313.09	3624.89	0	-1	-1	-1	0	0	6
ENSMUSG00000026788	1372.62	1046.35	587.232	775.663	0	-1	-1	-1	0	0	6
ENSMUSG00000029475	1021.04	791.709	391.232	438.2	0	-1	-1	-1	0	0	6
ENSMUSG00000037661	1588.47	1328.35	523.599	620.369	0	-1	-1	-1	0	0	6
ENSMUSG00000041765	1198.92	1048.99	410.181	487.3	0	-1	-1	-1	0	0	6
ENSMUSG00000039238	7195.29	5848.94	2062.42	2563.23	0	-1	-1	-1	0	0	6
ENSMUSG00000020327	27.1279	8.33753	0	0	0	-1	-1	-1	0	0	6
ENSMUSG00000036598	483.747	138.218	3.60593	46.3151	0	-1	-1	-1	0	0	6
ENSMUSG00000046338	41.4298	16.5841	1.84697	2.60186	0	-1	-1	-1	0	0	6
ENSMUSG00000031258	7512.54	1365.24	93.1761	223.177	0	-1	-1	-1	0	0	6
ENSMUSG00000043419	3446.51	548.543	63.1517	147.804	0	-1	-1	-1	0	0	6
ENSMUSG00000031981	145.706	28.9453	0.400659	7.86483	0	-1	-1	-1	0	0	6
ENSMUSG00000079722	14.6466	8.44015	0	0	0	-1	-1	-1	0	0	6
ENSMUSG00000000127	1959.17	1280.49	860.078	560.091	0	-1	-1	0	-1	0	6
ENSMUSG00000039960	1166	809.592	557.593	349.935	0	-1	-1	0	-1	0	6
ENSMUSG00000025538	1158.42	781.249	447.577	293.113	0	-1	-1	0	-1	0	6
ENSMUSG00000020895	442.154	237.096	183.745	113.546	0	-1	-1	0	-1	0	6
ENSMUSG00000001482	3171.63	2594.74	1096.99	971.556	0	-1	-1	0	-1	0	6
ENSMUSG00000021025	5970.34	4798.69	2269.04	1461.41	0	-1	-1	0	-1	0	6
ENSMUSG00000004127	777.791	548.147	270.291	143.278	0	-1	-1	0	-1	0	6
ENSMUSG00000095105	459.046	333.671	153.092	97.2423	0	-1	-1	0	-1	0	6
ENSMUSG00000042363	6797.98	6282.4	1909.4	949.178	0	-1	-1	0	-1	0	6
ENSMUSG00000002769	43.6095	30.9717	5.86013	4.48866	0	-1	-1	0	-1	0	6
ENSMUSG00000041025	1579.74	1082.99	248.697	163.661	0	-1	-1	0	-1	0	6
ENSMUSG00000047854	1094.46	756.251	253.675	128.227	0	-1	-1	0	-1	0	6
ENSMUSG00000003032	10854.5	6267.68	2157.49	1096.63	0	-1	-1	0	-1	0	6
ENSMUSG00000036960	4633.96	2396.39	1009.63	582.022	0	-1	-1	0	-1	0	6
ENSMUSG00000093930	33943.5	18660.4	7282.95	7026.59	0	-1	-1	0	-1	0	6
ENSMUSG00000049593	3180.45	2195.22	47.7572	19.0079	0	-1	-1	0	-1	0	6
ENSMUSG00000009900	151.674	41.6259	12.2772	2.30399	0	-1	-1	0	-1	0	6
ENSMUSG00000022754	31775.6	8955.54	2387.89	945.508	0	-1	-1	0	-1	0	6
ENSMUSG00000037185	12547	3526.53	659.926	716.775	0	-1	-1	0	-1	0	6
ENSMUSG00000041046	348.631	109.807	33.0563	18.3521	0	-1	-1	0	-1	0	6
ENSMUSG00000020838	932.726	210.303	114.193	38.8296	0	-1	-1	0	-1	0	6
ENSMUSG00000043068	580.579	148.33	93.1039	21.3514	0	-1	-1	0	-1	0	6
ENSMUSG00000032131	337.996	59.7292	10.3423	2.18467	0	-1	-1	0	-1	0	6
ENSMUSG00000069441	63435.5	10841.8	842.207	94.7614	0	-1	-1	0	-1	0	6
ENSMUSG00000050808	5033.78	864.595	440.112	119.131	0	-1	-1	0	-1	0	6
ENSMUSG00000044951	229.044	14.0004	5.7038	0.575997	0	-1	-1	0	-1	0	6
ENSMUSG00000023033	241.108	96.267	14.2188	1.74774	0	-1	-1	0	-1	0	6
ENSMUSG00000056656	99.3454	42.6671	9.63551	0.436935	0	-1	-1	0	-1	0	6
ENSMUSG00000083878	87.3154	49.1042	10.7495	2.60186	0	-1	-1	0	-1	0	6
ENSMUSG00000085649	48.5476	29.2356	3.13039	1.72799	0	-1	-1	0	-1	0	6
ENSMUSG00000039217	5256.48	2222.82	1115.24	329.605	0	-1	-1	0	-1	0	6
ENSMUSG00000055676	57.8587	20.5168	9.5475	2.32374	0	-1	-1	0	-1	0	6
ENSMUSG00000056078	9125.51	3144.29	1257.95	307.083	0	-1	-1	0	-1	0	6
ENSMUSG00000000142	247.672	32.787	26.8835	22.5034	-1	-1	-1	0	0	0	6
ENSMUSG00000031380	889.87	100.951	87.2963	82.8226	-1	-1	-1	0	0	0	6
ENSMUSG00000037071	20318.8	2137.79	1978.35	1848.12	-1	-1	-1	0	0	0	6
ENSMUSG00000052557	897.361	98.185	87.4487	69.9318	-1	-1	-1	0	0	0	6
ENSMUSG00000063415	3905.48	442.064	386.478	296.77	-1	-1	-1	0	0	0	6
ENSMUSG00000022629	15126	1339.55	1522.61	1465.88	-1	-1	-1	0	0	0	6
ENSMUSG00000091553	426.121	38.8253	41.6593	38.7893	-1	-1	-1	0	0	0	6
ENSMUSG00000014592	2272.84	242.592	183.605	128.224	-1	-1	-1	0	0	0	6
ENSMUSG00000021054	8402.34	1143.44	826.766	560.306	-1	-1	-1	0	0	0	6
ENSMUSG00000022512	37192.3	4797.17	4115.55	2025.65	-1	-1	-1	0	0	0	6
ENSMUSG00000057967	153.172	19.9478	16.9354	7.22959	-1	-1	-1	0	0	0	6
ENSMUSG00000001911	1543.73	210.752	199.46	206.857	-1	-1	-1	0	0	0	6
ENSMUSG00000020785	435.905	47.3389	59.9622	51.699	-1	-1	-1	0	0	0	6
ENSMUSG00000041481	850.458	97.8037	120.61	103.638	-1	-1	-1	0	0	0	6
ENSMUSG00000067242	60.3644	6.51636	7.14355	8.22277	-1	-1	-1	0	0	0	6
ENSMUSG00000020105	545.014	87.0469	66.1126	55.8314	-1	-1	-1	0	0	0	6
ENSMUSG00000023206	972.244	150.504	123.564	107.033	-1	-1	-1	0	0	0	6
ENSMUSG00000021678	1375.39	237.521	188.834	156.206	-1	-1	-1	0	0	0	6
ENSMUSG00000042608	1164.83	211.168	145.724	128.523	-1	-1	-1	0	0	0	6
ENSMUSG00000022508	1583.29	246.645	256.131	165.366	-1	-1	-1	0	0	0	6
ENSMUSG00000031467	6295.42	1136.67	1014.73	731.703	-1	-1	-1	0	0	0	6
ENSMUSG00000023918	9066.06	1822.15	1042.72	1278.52	-1	-1	-1	0	0	0	6
ENSMUSG00000025790	3449.34	602.577	344.746	538.672	-1	-1	-1	0	0	0	6
ENSMUSG00000038354	3436	633.355	320.398	513.739	-1	-1	-1	0	0	0	6
ENSMUSG00000026748	5822.4	964.619	608.025	752.296	-1	-1	-1	0	0	0	6
ENSMUSG00000032497	2587.66	391.157	252.897	395.361	-1	-1	-1	0	0	0	6
ENSMUSG00000056458	105.87	14.8539	10.3554	17.3194	-1	-1	-1	0	0	0	6
ENSMUSG00000035168	9247.63	1227.65	1042.81	1413.62	-1	-1	-1	0	0	0	6
ENSMUSG00000022096	2299.69	512.963	217.371	217.141	-1	-1	-1	0	0	0	6
ENSMUSG00000025577	343.429	70.4686	31.3657	35.1153	-1	-1	-1	0	0	0	6
ENSMUSG00000037617	1864.69	371.789	132.577	179.845	-1	-1	-1	0	0	0	6
ENSMUSG00000022865	22536.6	4145.51	2099.29	1769.41	-1	-1	-1	0	0	0	6
ENSMUSG00000024059	10305.9	1708.55	670.468	697.085	-1	-1	-1	0	0	0	6
ENSMUSG00000032186	182.425	31.4439	11.9646	11.4401	-1	-1	-1	0	0	0	6
ENSMUSG00000029126	426.549	63.0462	29.0629	19.7625	-1	-1	-1	0	0	0	6
ENSMUSG00000022456	168.549	25.4172	8.10119	21.8871	-1	-1	-1	0	0	0	6
ENSMUSG00000037887	1586.03	217.591	105.062	153.452	-1	-1	-1	0	0	0	6
ENSMUSG00000091971	517.412	57.2365	34.9099	57.7758	-1	-1	-1	0	0	0	6
ENSMUSG00000028532	506.825	124.975	30.5841	59.0076	-1	-1	-1	0	0	0	6
ENSMUSG00000032561	18925.5	4867.27	2159.71	2416.69	-1	-1	-1	0	0	0	6
ENSMUSG00000038987	231.026	54.4709	27.434	20.8346	-1	-1	-1	0	0	0	6
ENSMUSG00000040451	7668.58	1757.2	1080.22	724.419	-1	-1	-1	0	0	0	6
ENSMUSG00000044636	858.136	173.463	114.629	58.2136	-1	-1	-1	0	0	0	6
ENSMUSG00000003949	1465.23	238.814	155.77	274.808	-1	-1	-1	0	0	0	6
ENSMUSG00000047446	6457.65	1075.28	643.885	1220.67	-1	-1	-1	0	0	0	6
ENSMUSG00000079491	1409.29	207.467	132.588	312.237	-1	-1	-1	0	0	0	6
ENSMUSG00000009248	293.348	44.0219	44.7372	57.5964	-1	-1	-1	0	0	0	6
ENSMUSG00000061878	1026.37	151.295	139.8	216.687	-1	-1	-1	0	0	0	6
ENSMUSG00000022197	5166.51	604.548	374.391	922.225	-1	-1	-1	0	0	0	6
ENSMUSG00000091243	3679.68	409.879	243.443	650.129	-1	-1	-1	0	0	0	6
ENSMUSG00000030849	3187.88	337.574	266.095	518.613	-1	-1	-1	0	0	0	6
ENSMUSG00000051435	301.576	34.2328	34.7141	50.1883	-1	-1	-1	0	0	0	6
ENSMUSG00000020894	730.469	44.1979	104.668	144.171	-1	-1	-1	0	0	0	6
ENSMUSG00000032679	4738.09	314.829	576.432	873.037	-1	-1	-1	0	0	0	6
ENSMUSG00000032531	2704.52	228.717	284.875	576.619	-1	-1	-1	0	0	0	6
ENSMUSG00000018909	847.885	131.673	173.741	197.38	-1	-1	-1	0	0	0	6
ENSMUSG00000040389	1468.27	212.485	295.383	310.533	-1	-1	-1	0	0	0	6
ENSMUSG00000047205	2385.18	345.545	518.24	489.284	-1	-1	-1	0	0	0	6
ENSMUSG00000030096	24421.1	3159.84	4525.68	5445.84	-1	-1	-1	0	0	0	6
ENSMUSG00000033016	1174.87	189.563	243.644	221.32	-1	-1	-1	0	0	0	6
ENSMUSG00000057315	1646.22	320.85	330.317	313.727	-1	-1	-1	0	0	0	6
ENSMUSG00000064147	220.018	45.4443	42.1086	41.1525	-1	-1	-1	0	0	0	6
ENSMUSG00000026896	1591.89	210.159	343.786	421.179	-1	-1	-1	0	0	0	6
ENSMUSG00000020009	11188.7	1430.76	3363.16	2596.22	-1	-1	-1	0	0	0	6
ENSMUSG00000021360	4913.87	786.912	1493.66	1051.08	-1	-1	-1	0	0	0	6
ENSMUSG00000061536	529.494	90.9061	163.34	117.122	-1	-1	-1	0	0	0	6
ENSMUSG00000020272	636.548	128.831	204.001	138.377	-1	-1	-1	0	0	0	6
ENSMUSG00000035778	4775.72	927.339	1503.76	972.299	-1	-1	-1	0	0	0	6
ENSMUSG00000033392	2219.19	447.648	672.686	404.933	-1	-1	-1	0	0	0	6
ENSMUSG00000033720	442.231	66.4333	120.857	75.096	-1	-1	-1	0	0	0	6
ENSMUSG00000060733	2123.54	235.826	530.873	425.47	-1	-1	-1	0	0	0	6
ENSMUSG00000048027	749.328	138.462	271.937	121.293	-1	-1	-1	0	0	0	6
ENSMUSG00000019878	1361.83	153.433	306.931	139.129	-1	-1	-1	0	0	0	6
ENSMUSG00000066363	479.237	46.3887	98.8274	40.8357	-1	-1	-1	0	0	0	6
ENSMUSG00000038212	6645.41	834.966	1623.63	831.676	-1	-1	-1	0	0	0	6
ENSMUSG00000041153	674.134	105.44	135.486	76.8224	-1	-1	-1	0	0	0	6
ENSMUSG00000041762	1063.35	141.066	178.892	68.1059	-1	-1	-1	0	0	0	6
ENSMUSG00000027947	824.921	52.1659	138.448	87.8083	-1	-1	-1	0	0	0	6
ENSMUSG00000070576	474.494	33.3618	61.683	59.0084	-1	-1	-1	0	0	0	6
ENSMUSG00000003382	2947.27	748.183	611.731	640.348	-1	-1	-1	0	0	0	6
ENSMUSG00000040888	752.089	172.58	176.522	161.332	-1	-1	-1	0	0	0	6
ENSMUSG00000043154	3694.32	823.828	723.65	891.139	-1	-1	-1	0	0	0	6
ENSMUSG00000020275	617.913	121.45	155.265	128.901	-1	-1	-1	0	0	0	6
ENSMUSG00000004043	442.281	129.635	101.28	106.575	-1	-1	-1	0	0	0	6
ENSMUSG00000049940	1309.5	405.521	303.375	305.545	-1	-1	-1	0	0	0	6
ENSMUSG00000033902	466.823	136.72	107.472	86.198	-1	-1	-1	0	0	0	6
ENSMUSG00000047250	18515.9	5476.38	4103.89	3845.41	-1	-1	-1	0	0	0	6
ENSMUSG00000026817	5318.39	1515.81	1563.22	1083.86	-1	-1	-1	0	0	0	6
ENSMUSG00000041235	1395.7	373.578	403.469	247.83	-1	-1	-1	0	0	0	6
ENSMUSG00000018736	12479	3980.27	2388.75	1815.17	-1	-1	-1	0	0	0	6
ENSMUSG00000036943	9284.62	2880.73	2068.3	1333.22	-1	-1	-1	0	0	0	6
ENSMUSG00000029851	1674.98	465.514	252.056	328.64	-1	-1	-1	0	0	0	6
ENSMUSG00000030287	3046.37	922.132	505.543	565.757	-1	-1	-1	0	0	0	6
ENSMUSG00000053769	331.944	95.2142	56.3274	63.3572	-1	-1	-1	0	0	0	6
ENSMUSG00000047875	683.273	165.545	103.723	146.576	-1	-1	-1	0	0	0	6
ENSMUSG00000042644	3542.53	826.437	634.473	489.761	-1	-1	-1	0	0	0	6
ENSMUSG00000090257	62.7647	15.15	14.6063	8.54039	-1	-1	-1	0	0	0	6
ENSMUSG00000004085	4505.68	1852.74	1382.79	1002.18	-1	-1	-1	0	0	0	6
ENSMUSG00000024077	4645.51	1669.83	1355.76	1202.95	-1	-1	-1	0	0	0	6
ENSMUSG00000036580	2371.73	751.998	773.968	588.693	-1	-1	-1	0	0	0	6
ENSMUSG00000026556	885.923	315.18	208.72	182.267	-1	-1	-1	0	0	0	6
ENSMUSG00000032782	172.913	61.7615	39.5417	39.4048	-1	-1	-1	0	0	0	6
ENSMUSG00000029859	1974.32	803.445	445.652	402.346	-1	-1	-1	0	0	0	6
ENSMUSG00000029868	212.404	77.2519	32.8317	39.7035	-1	-1	-1	0	0	0	6
ENSMUSG00000066152	4819.55	1684.11	818.242	743.381	-1	-1	-1	0	0	0	6
ENSMUSG00000068015	1464.33	479.866	280.028	275.057	-1	-1	-1	0	0	0	6
ENSMUSG00000003534	545.226	143.175	114.876	201.214	-1	-1	-1	0	0	0	6
ENSMUSG00000012296	486.402	127.717	92.1817	168.361	-1	-1	-1	0	0	0	6
ENSMUSG00000022895	3334.37	980.736	792.263	1138.81	-1	-1	-1	0	0	0	6
ENSMUSG00000026171	419.599	109.687	94.5791	141.412	-1	-1	-1	0	0	0	6
ENSMUSG00000029427	1669.82	486.734	425.325	510.271	-1	-1	-1	0	0	0	6
ENSMUSG00000033713	3447.82	938.447	793.752	940.939	-1	-1	-1	0	0	0	6
ENSMUSG00000024887	568.755	156.035	96.6349	175.196	-1	-1	-1	0	0	0	6
ENSMUSG00000034157	3435.27	955.683	582.609	1023.49	-1	-1	-1	0	0	0	6
ENSMUSG00000053510	10370.4	3064.04	1723.09	3023.5	-1	-1	-1	0	0	0	6
ENSMUSG00000032519	381.603	93.182	68.2657	113.965	-1	-1	-1	0	0	0	6
ENSMUSG00000049550	14369.1	3726.91	2724.31	4311.46	-1	-1	-1	0	0	0	6
ENSMUSG00000032763	2451.33	633.129	515.074	756.469	-1	-1	-1	0	0	0	6
ENSMUSG00000019066	8825.28	2764.25	1639.85	2454.12	-1	-1	-1	0	0	0	6
ENSMUSG00000026510	1489.31	483.338	279.431	416.596	-1	-1	-1	0	0	0	6
ENSMUSG00000037316	1642.52	511.988	322.583	417.503	-1	-1	-1	0	0	0	6
ENSMUSG00000032578	783.664	281.511	127.017	219.346	-1	-1	-1	0	0	0	6
ENSMUSG00000036450	2815.42	1050.44	570.495	873.907	-1	-1	-1	0	0	0	6
ENSMUSG00000063268	544.966	212.863	111.039	156.111	-1	-1	-1	0	0	0	6
ENSMUSG00000028716	11697.6	3769.57	1466.28	2858.72	-1	-1	-1	0	0	0	6
ENSMUSG00000043333	1130.78	363.276	143.27	397.479	-1	-1	-1	0	0	0	6
ENSMUSG00000044991	332.913	110.238	55.2883	107.708	-1	-1	-1	0	0	0	6
ENSMUSG00000078619	1900.35	654.628	320.817	596.923	-1	-1	-1	0	0	0	6
ENSMUSG00000023055	2880.97	635.185	674.835	1141.21	-1	-1	-1	0	0	0	6
ENSMUSG00000035877	2616.9	412.659	586.641	907.474	-1	-1	-1	0	0	0	6
ENSMUSG00000050373	440.957	79.6771	101.736	133.509	-1	-1	-1	0	0	0	6
ENSMUSG00000067212	1122.53	214.382	224.232	366.222	-1	-1	-1	0	0	0	6
ENSMUSG00000022389	2595.83	365.12	389.384	771.69	-1	-1	-1	0	0	0	6
ENSMUSG00000029263	1354.25	252.035	195.542	407.108	-1	-1	-1	0	0	0	6
ENSMUSG00000040746	3818.72	768.812	619.868	1258.33	-1	-1	-1	0	0	0	6
ENSMUSG00000027602	1128.27	249.02	143.36	307.791	-1	-1	-1	0	0	0	6
ENSMUSG00000030217	467.391	104.394	51.0308	115.154	-1	-1	-1	0	0	0	6
ENSMUSG00000031861	802.296	170.384	126.678	209.795	-1	-1	-1	0	0	0	6
ENSMUSG00000037321	2224.51	465.66	349.571	487.321	-1	-1	-1	0	0	0	6
ENSMUSG00000039382	1900.88	345.571	297.706	385.428	-1	-1	-1	0	0	0	6
ENSMUSG00000044433	94.8483	20.5226	5.4529	22.4828	-1	-1	-1	0	0	0	6
ENSMUSG00000001247	577.616	232.532	170.343	206.556	-1	-1	-1	0	0	0	6
ENSMUSG00000026765	1223.12	512.539	370.047	430.931	-1	-1	-1	0	0	0	6
ENSMUSG00000002222	3022.67	1076.72	816.352	1008.34	-1	-1	-1	0	0	0	6
ENSMUSG00000022505	31880.5	11477.7	7964.38	9697.38	-1	-1	-1	0	0	0	6
ENSMUSG00000028617	1125.2	375.171	310.511	343.262	-1	-1	-1	0	0	0	6
ENSMUSG00000005718	236.281	89.085	70.2493	73.7836	-1	-1	-1	0	0	0	6
ENSMUSG00000032434	5805.95	2320.85	1695.26	1857.65	-1	-1	-1	0	0	0	6
ENSMUSG00000025702	2583.57	985.472	637.394	981.665	-1	-1	-1	0	0	0	6
ENSMUSG00000031482	473.641	209.499	120.961	192.673	-1	-1	-1	0	0	0	6
ENSMUSG00000031714	1340.74	596.146	335.355	526.283	-1	-1	-1	0	0	0	6
ENSMUSG00000021140	913.585	349.19	325.99	334.285	-1	-1	-1	0	0	0	6
ENSMUSG00000074698	2018.54	745.837	723.079	670.517	-1	-1	-1	0	0	0	6
ENSMUSG00000036989	213.533	78.0378	67.8098	82.5231	-1	-1	-1	0	0	0	6
ENSMUSG00000001419	612.124	234.7	231.235	265.346	-1	-1	-1	0	0	0	6
ENSMUSG00000027775	4267.63	1605.86	1632.68	1884	-1	-1	-1	0	0	0	6
ENSMUSG00000036246	287.287	108.725	103.915	131.681	-1	-1	-1	0	0	0	6
ENSMUSG00000025239	2551.13	897.777	875.944	1164.01	-1	-1	-1	0	0	0	6
[truncated: 4,585 more rows]
